# Supplementary material for: Redox- and protonation-driven Baird and Clar aromaticity in asymmetric multicyclic octaphyrins
Source: Royal Society of Chemistry journal article supplement (doi:10.1039/d6sc00941g), 2026-06-09
Supplement: d6sc00941g1.pdf [file d6sc00941g1.pdf]

## Supporting Information

### Redox- and Protonation-Driven Baird and Clar Aromatic Duality in Asymmetric Multicyclic Octaphyrins

Md Ashif Ali<sup>a</sup>, Ji Heon Kim<sup>b,c</sup>, Younghun Kim<sup>a</sup>, Yunwoo Nam<sup>a</sup>, Juwon Oh<sup>\*b,c</sup>, Woo-Dong Jang<sup>\*a</sup> and Dongho Kim<sup>\*a</sup>

#### Affiliations

<sup>a</sup>Department of Chemistry, Yonsei University, 50 Yonsei-ro, Seodaemun-gu, Seoul 03722, Korea

<sup>b</sup>Department of Chemistry and Green-Nano Material Research Center, Kyungpook National University, Daegu 41566, Korea

<sup>c</sup>Department of Chemistry, Soonchunhyang University, Asan 31538, Korea

#### Email

JO: juwoh933@knu.ac.kr

W-DJ: wdjang@yonsei.ac.kr

DK: dongho@yonsei.ac.kr

| No | Contents                                                                                                                                      | Page No        |
|----|-----------------------------------------------------------------------------------------------------------------------------------------------|----------------|
| 1  | <b>General Experimental Section:</b> Materials and Methods, Computational methods, General procedure for Synthesis, and Data Characterization | <b>S4-S10</b>  |
| 2  | <b>Figures S1-S8:</b> <sup>1</sup> H, <sup>13</sup> C { <sup>1</sup> H} NMR spectra and MALDI of compounds <b>5</b> and <b>6/6'</b>           | <b>S11-S18</b> |
| 3  | <b>Figures S9-S13:</b> <sup>1</sup> H- <sup>1</sup> H COSY, full and expanded NOESY spectra of compound <b>5</b> and <b>6</b> .               | <b>S19-S23</b> |
| 4  | <b>Figures S14-S15.</b> Comparison of <sup>1</sup> H NMR spectra of macrocycles <b>5</b> and <b>6</b> with TFA.                               | <b>S24-S25</b> |
| 5  | <b>Figure S16:</b> EPR spectrum and Mulliken spin density plot of <b>5•2H<sup>+</sup></b>                                                     | <b>S26</b>     |
| 6  | <b>Figure S17.</b> UV-Vis-NIR spectra of compounds <b>5</b> and <b>6/6'</b> .                                                                 | <b>S27</b>     |

|    |                                                                                                                                                                                                           |                |
|----|-----------------------------------------------------------------------------------------------------------------------------------------------------------------------------------------------------------|----------------|
| 7  | <b>Figures S18-S19.</b> Cyclic voltammograms, differential pulse voltammograms and Spectro electrochemistry of compounds <b>5</b> and <b>6</b>                                                            | <b>S28-S29</b> |
| 8  | <b>Figures S20-23:</b> <sup>1</sup> H NMR spectra and HRMS of oxidized compound [ <b>5</b> ] <sup>2+</sup> and [ <b>6</b> ] <sup>2+</sup>                                                                 | <b>S30-S33</b> |
| 9  | <b>Figure S24:</b> X-ray crystal structure of macrocycle <b>5</b> . The thermal ellipsoid plots (scaled to the 50% probability level).                                                                    | <b>S34</b>     |
| 10 | <b>Table S1.</b> Crystal data for macrocycle <b>5</b> .                                                                                                                                                   | <b>S35</b>     |
| 11 | <b>Table S2-S3.</b> Bond lengths and bond angles for macrocycle <b>5</b> .                                                                                                                                | <b>S36-S40</b> |
| 12 | <b>Figure S25:</b> Femtosecond transient absorption spectra and decay profiles of neutral, protonated, and oxidized forms of <b>5</b> and <b>6</b> .                                                      | <b>S41</b>     |
| 13 | <b>Figures S26-S30:</b> Ground state optimized structures of stable conformers for neutral <i>syn</i> <b>6'</b> , and neutral, protonated, oxidized form of macrocycles <b>5</b> and <i>anti</i> <b>6</b> | <b>S42-44</b>  |
| 14 | <b>Figures S31-S33:</b> Calculated <sup>1</sup> H NMR chemical shifts for compounds <b>5</b> , <b>6</b> and <b>6'</b> obtained using the GIAO method at CAM-B3LYP levels                                  | <b>S45-47</b>  |
| 15 | <b>Figure S34-S38:</b> AICD plot of all forms of compound <b>5</b> and <b>6</b> .                                                                                                                         | <b>S48-S52</b> |
| 16 | <b>Figures S39-S40:</b> NICS <sub>zz</sub> (2) all forms of compound <b>5</b> and <b>6</b> .                                                                                                              | <b>S53</b>     |
| 17 | <b>Figure S41:</b> Optimized Structure and AICD plot of <b>5•2H<sup>+</sup></b> in S <sub>0</sub> state with CAM-B3LYP/6-311G(d,p) level of Theory.                                                       | <b>S54</b>     |
| 18 | <b>Figure S42:</b> NICS <sub>zz</sub> (2) plot of <b>5•2H<sup>+</sup></b> in S <sub>0</sub> state with B3LYP and CAM-B3LYP/6-311G(d,p) level of Theory.                                                   | <b>S55</b>     |
| 19 | <b>Figures S43-S44:</b> HOMA values of all forms of compound <b>5</b> and <b>6</b> .                                                                                                                      | <b>S56-S57</b> |
| 20 | <b>Figure S45:</b> EDDB analysis of all forms of <b>5</b> and <b>6</b> .                                                                                                                                  | <b>S58</b>     |
| 21 | <b>Figure S46-S52:</b> Frontier MO diagram of all forms of <b>5</b> and <b>6</b> .                                                                                                                        | <b>S59-S65</b> |
| 22 | <b>Figure S53-S54:</b> NICS(2) <sub>zz</sub> map, ACID plot, and MO diagram of the isolated upper and bottom sub-macrocycles of <b>5</b> .                                                                | <b>S66-S67</b> |
| 23 | <b>Figure S55-S57:</b> Comparison of experimental UV-Vis-NIR spectra with simulated electronic transitions of all forms of <b>5</b> and <b>6</b> .                                                        | <b>S68-S70</b> |
| 24 | <b>Table S4-S19:</b> Cartesian coordinated for optimized geometry of all forms of <b>5</b> and <b>6</b> .                                                                                                 | <b>S71-S95</b> |

|    |            |     |
|----|------------|-----|
| 25 | References | S96 |
|----|------------|-----|

## General Experimental Section

### Materials and Methods

All chemicals used for synthesis were of reagent grade unless otherwise specified. Boron trifluoride diethyl etherate ( $\text{BF}_3 \cdot \text{OEt}_2$ ), trifluoroacetic acid (TFA), and 2,3-dichloro-5,6-dicyano-1,4-benzoquinone (DDQ) were obtained from Sigma-Aldrich and were used as such. Solvents such as petroleum ether (60-80°C), ethyl acetate, and dichloromethane purchased from Merck, Korea, and were used without further purification. Column chromatography was performed on aluminum oxide active basic (70-200 mesh, pH value 8.5-10).

$^1\text{H}$  (1D and 2D) and  $^{13}\text{C}\{^1\text{H}\}$  NMR spectra were recorded on Bruker 400 and 300 MHz FT-NMR spectrometers in  $\text{CDCl}_3$  and  $\text{CD}_2\text{Cl}_2$  using tetramethylsilane as the internal reference. The  $^{13}\text{C}\{^1\text{H}\}$  NMR frequencies are 100.6 and 75.4 MHz for the 400 and 300 MHz instruments, respectively. Structural assignments were made using additional information from  $^1\text{H}$ - $^1\text{H}$  COSY and  $^1\text{H}$ - $^1\text{H}$  NOESY experiments as needed.

High-resolution mass spectroscopy (HR-MS) spectra were recorded with a ThermoFisher Exploris\_240 mass spectrometer using positive mode ESI methods in acetonitrile or methanol. MALDI-TOF/TOF measured with Bruker Autoflex Max Mass Spectrometer using dithranol (1,8,9-trihydroxyanthracene) and trans-2-[3-(4-tert-Butylphenyl)-2-methyl-2-propenylidene]malononitrile (DCTB) as matrixes. UV-visible absorption spectra were recorded on a double-beam UV-Vis/NIR spectrophotometer (V-770, JASCO). Stock solutions of the compounds ( $10^{-5}$  M) were prepared using HPLC-grade chloroform. EPR spectra were

recorded on a Bruker EMX Plus with X-band CW EPR model equipped with a cryostat controller.

All electrochemical measurements were conducted using a CH Instruments (Austin, TX) model 760E potentiostat and carried out at room temperature in a three-electrode system with platinum wire as the counter electrode and an Ag/AgCl (1 M KCl) reference electrode. The reported potentials were calibrated to RHE, using the following equation:  $E(\text{RHE}) = E(\text{Ag/AgCl}) + (0.222 + 0.059 \text{ pH}) \text{ V}$ . The concentrations of the samples were maintained at 0.1 M containing tetrabutylammonium hexafluorophosphate (TBAPF<sub>6</sub>) as the supporting electrolyte (0.1 M) in dichloromethane at 25 °C under an argon atmosphere at a scan rate of 100 mV/s.

Spectro-electrochemical measurements were performed in UV-Vis/NIR spectrophotometer (V-770, JASCO) by incorporation of CH Instrument Electrochemical Analyzer in 1 M tetrabutylammonium hexafluorophosphate (supporting electrolyte) solution prepared in freshly distilled dichloromethane. The assembly consisted of a thin layer quartz glass cell (optical path length of 1 mm), and a three electrode setup (Pt gauze, Pt wire, and silver nitrate as the reference electrode). A UV-vis spectrum was recorded every 1 min, while adjusting the potential corresponding to the second oxidation waves.

Single crystals of **5** were mounted on a MiTeGen MicroLoops after it was coated with Parabar oil. The data were collected at 298 K using monochromated Cu K $\alpha$  radiation ( $\lambda = 1.54184 \text{ \AA}$ ) and a Hybrid Pixel Array Detector in a Rigaku XtaLab Synergy-i diffractometer and processed using CrysAlisPro 1.171.42.77a (Rigaku Oxford Diffraction, 2022). The crystal structures were solved by the direct method with SHELX-XT,<sup>1</sup> and refined by full matrix least-squares calculations with the SHELX-XL<sup>2</sup> in the Olex2<sup>3</sup> program package. Deposition CCDC 2432301 (for compound **5**) contains the supplementary crystallographic data for this paper.

Femtosecond transient absorption (TA) experiments were conducted using a custom-built TA spectrometer, powered by a Ti: Sapphire regenerative amplifier system (800 nm, 350  $\mu$ J, 10 kHz, 35 fs, Spitfire Pro, Spectra-Physics). A pump pulse was generated using a commercial optical parametric amplifier (TOPAS, Spectra-Physics). For the probe pulse, a fraction of the fundamental pulse was focused onto an 8 mm sapphire crystal, creating a white-light continuum (WLC). The time delay between the pump and probe beams was adjusted using a linear motor stage (ILS300LM-S, Newport) situated in the probe generation beamline. The dispersed WLC probe spectra were captured by a high-speed spectrometer (Ultrafast Systems), enabling us to acquire TA spectra at a rate of 2 kHz. To mitigate polarization-dependent signals, the pump polarization was set to the magic angle ( $54.7^\circ$ ) relative to the horizontally polarized probe pulse, using a Glan-laser calcite polarizer (GL10-A, Thorlabs) and an achromatic half-wave plate (AQWP05M-600, Thorlabs). The diameter of the pump pulse (at a  $1/e^2$  height) was adjusted to 1 mm at the sample stage by manipulating the position of a plano-convex lens. For accuracy and to account for long-term laser fluctuations, each data set was compiled from five individual scans. The absence of sample degradation throughout the experiment was confirmed by comparing the decay kinetics across each scan, as well as by recording the UV-vis-NIR spectrum of each sample before and after the TA measurements.

## Computational Methods

All the calculations were performed using of the Gaussian G16 program package.<sup>4</sup> The DFT method, hybrid functional B3LYP with basis set 6-311G(d,p)<sup>5</sup> was used to optimize the geometries of the compounds **5**, **5•2H<sup>+</sup>**, **6**, **6'** and **6•2H<sup>+</sup>** in their ground ( $S_0$  and  $T_1$ ) states. The minimum energy surfaces of the optimized geometries of compounds were verified by vibrational analyses, and no imaginary frequencies were found. The vertical excitation energies

and oscillator strengths were obtained for the 50 lowest  $S_0 \rightarrow S_n$  transitions at the optimized  $S_0$ -state equilibrium geometries using the TD-DFT method that was carried out at the same level of theory.<sup>6</sup>

*General procedure for synthesis of octaphyrins (5-6)*

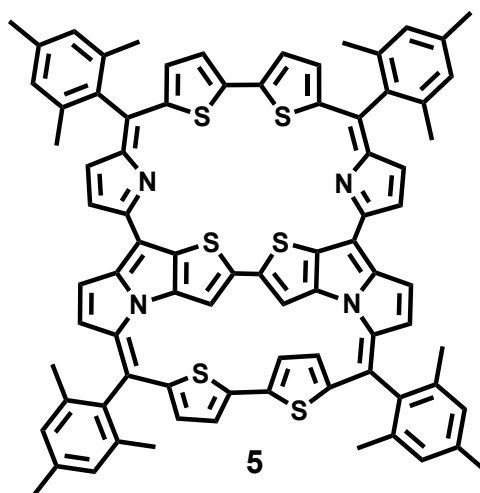

**Synthesis of 5:** A sample of appropriate bithiophene tripyrrane **7** (300 mg, 0.53 mmol) and 2,2-bithiophene carboxaldehyde **9** (50mg, 0.22 mmol) in dry dichloromethane was stirred for 15 min under  $N_2$  atmosphere. A catalytic amount of *p*-toluenesulfonic acid (15 mg, 0.08 mmol) was added to the above mixture and the reaction mixture was stirred for overnight under  $N_2$  atmosphere. The oxidant, 2,3-dichloro-5,6-dicyano-1,4-benzoquinone (DDQ, 350 mg, 1.5 mmol), was added with stirring continued in the open air for an additional 2 h. The volatiles were removed on rotary evaporator under vacuum. The resulted crude product was purified by basic alumina column chromatography using petroleum ether/ $CH_2Cl_2$  as the eluent. A brown band that eluted with petroleum ether/dichloromethane (60:40) was collected and the volatiles removed under vacuum to afford the desired octaphyrin as a dark brown solid in 11% yield.

$^1H$  NMR (300 MHz,  $CD_2Cl_2$ , 253K)  $\delta$  7.36 (d,  $J = 3.7$  Hz, 2H,  $\beta$ -th), 7.19 (d,  $J = 4.4$  Hz, 2H,  $\beta$ -py), 7.10 (d,  $J = 3.8$  Hz, 2H,  $\beta$ -th), 6.94 (d,  $J = 3.6$  Hz, 8H, *mes*-CH), 6.82 (d,  $J = 4.7$ , 2H,  $\beta$ -th), 6.77 (d,  $J = 5.9$  Hz, 2H,  $\beta$ -py), 6.59 (d,  $J = 4.4$  Hz, 2H,  $\beta$ -py), 6.50 (d,  $J = 4.7$  Hz, 2H,

$\beta$ -th), 5.89 (d,  $J = 5.8$  Hz, 2H,  $\beta$ -py), 5.42 (s, 2H,  $\beta$ -th), 2.36 (s, 6H), 2.32 (d,  $J = 3.1$  Hz, 12H), 2.28 (s, 6H), 2.12 (s, 6H), 2.04 (s, 6H).  $^{13}\text{C}\{^1\text{H}\}$  NMR (75 MHz,  $\text{CD}_2\text{Cl}_2$ , 253K)  $\delta$  162.1, 152.8, 141.9, 140.6, 139.6, 138.4, 138.0, 137.6, 136.8, 136.1, 135.7, 134.8, 128.7, 127.9, 126.6, 126.2, 122.8, 109.3, 100.0, 31.5, 29.6, 22.6, 20.8, 20.7, 20.4, 19.7, 19.6, 13.8. UV-vis (in  $\text{CH}_2\text{Cl}_2$ ,  $\lambda_{\text{max}}/\text{nm}$ ,  $\log \epsilon$ ) = 340 (4.49), 483 (4.74), 553 (4.60). MALDI-TOF mass ( $\text{C}_{82}\text{H}_{62}\text{N}_4\text{S}_6$ ): 1295.566 (M+H) $^+$ .

**[5] $^{2+}$** : The dicationic species was synthesized via the addition of excess  $\text{NOSbF}_6$  to a solution of **5** in dichloromethane at  $-20$  °C. Subsequently, the solution was stirred for 5 minutes at the same temperature. A subtle color change from brown to purple indicated the formation of dicationic species **[5] $^{2+}$** . It was washed with pentane and obtained in quantitative yield (80%).

$^1\text{H}$  NMR (300 MHz,  $\text{CDCl}_3$ , 298K)  $\delta$  10.74 (s, 2H,  $\beta$ -CH), 9.84 (dd,  $J = 11.4$ , 4.8 Hz, 6H,  $\beta$ -CH), 9.09 (dd,  $J = 11.8$ , 4.8 Hz, 4H,  $\beta$ -CH), 7.48 (d,  $J = 9.8$  Hz, 4H, *mes*-CH), 7.35 (d,  $J = 10.0$  Hz, 6H, *mes*-CH,  $\beta$ -CH), 2.78 (s, 6H), 2.68 (s, 6H), 2.18 (s, 6H), 2.09 (s, 6H), 1.99 (s, 6H), 1.86 (s, 6H). UV-vis (in  $\text{CH}_2\text{Cl}_2$ ,  $\lambda_{\text{max}}/\text{nm}$ ,  $\log \epsilon$ ) = 546 (4.91), 711 (4.89), 1054 (4.23). HR-MS (ESI-TOF)  $m/z$ :  $[\text{M} + \text{H}]^+$  Calcd for  $(\text{C}_{82}\text{H}_{62}\text{N}_4\text{S}_6)^{2+}$  647.6649; Found 647.6648.

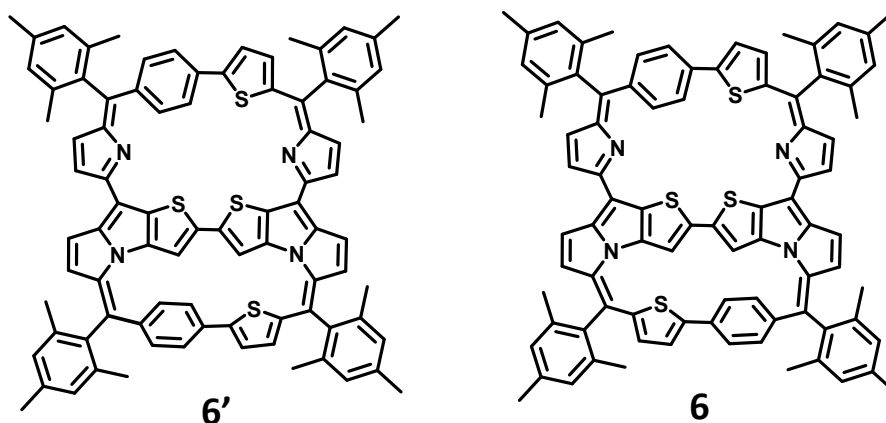

**Synthesis of 6/6'**: A sample of the appropriate benzothiophene tripyrrane **8** (300 mg, 0.54 mmol) and 2,2-bithiophene carboxaldehyde **9** (50 mg, 0.22 mmol) in dry dichloromethane was

stirred for 15 min under N<sub>2</sub> atmosphere. A catalytic amount of *p*-toluenesulfonic acid (15 mg, 0.08 mmol) was added to the above mixture and the reaction mixture was stirred for overnight under an N<sub>2</sub> atmosphere. The oxidant, 2,3-dichloro-5,6-dicyano-1,4-benzoquinone (DDQ, 360 mg, 1.6 mmol), was added and stirring was continued in open air for additional 2 h. The volatiles were removed on rotary evaporator under vacuum. The resulting crude product was purified by basic alumina column chromatography using petroleum ether/CH<sub>2</sub>Cl<sub>2</sub> as the eluent. The first brown band (*syn*) and second brown band (*anti*) that eluted with petroleum ether/dichloromethane (70:30) and (60:40) were collected, respectively, and the volatiles were removed to afford the desired octaphyrin **6/6'** as dark brown solids in 9-10% yields.

**6'**: <sup>1</sup>H NMR (400 MHz, CDCl<sub>3</sub>, 298K) δ 7.94 (d, *J* = 8.0 Hz, 4H), 7.72 (d, *J* = 8.0 Hz, 4H), 7.31 (s, 2H), 6.95 (d, *J* = 12.9 Hz, 8H), 6.73 (dd, *J* = 7.1, 4.2 Hz, 4H), 6.55 (t, *J* = 5.3 Hz, 4H), 6.51 (d, *J* = 3.8 Hz, 2H), 5.80 (d, *J* = 5.7 Hz, 2H), 2.36 (d, *J* = 12.6 Hz, 12H), 2.20 (s, 12H), 2.15 (s, 12H).

UV-vis (in CH<sub>2</sub>Cl<sub>2</sub>, λ<sub>max</sub>/nm, log ε) = 375 (4.45), 481 (4.75), 540 (4.58). MALDI-TOF mass (C<sub>86</sub>H<sub>66</sub>N<sub>4</sub>S<sub>4</sub>): 1283.594 (M+H)<sup>+</sup>.

**6**: <sup>1</sup>H NMR (400 MHz, CDCl<sub>3</sub>, 298K) δ 8.19 (s, 2H), 7.93 (d, *J* = 8.2 Hz, 2H), 7.45 (d, *J* = 3.8 Hz, 1H), 7.21 (d, *J* = 3.9 Hz, 1H), 7.14 (d, *J* = 4.0 Hz, 1H), 6.98 (d, *J* = 6.5 Hz, 12H), 6.94 (d, *J* = 5.9 Hz, 2H), 6.87 (d, *J* = 4.7 Hz, 2H), 6.69 (dd, *J* = 9.5, 4.3 Hz, 2H), 6.14 (d, *J* = 5.6 Hz, 1H), 6.10 (d, *J* = 5.8 Hz, 1H), 5.05 (s, 1H), 4.39 (s, 1H), 2.40 – 2.35 (m, 18H), 2.25 (s, 6H), 2.16 (d, *J* = 3.3 Hz, 12H). <sup>13</sup>C{<sup>1</sup>H} NMR (101 MHz, CDCl<sub>3</sub>) δ 145.1, 141.3, 139.9, 138.5, 138.3, 138.0, 137.6, 137.3, 137.2, 135.5, 130.9, 128.8, 128.2, 127.9, 126.4, 123.2, 122.8, 110.7, 29.7, 21.20, 21.17, 20.9, 20.6, 20.1. UV-vis (in CH<sub>2</sub>Cl<sub>2</sub>, λ<sub>max</sub>/nm, log ε) = 350 (4.39), 465 (4.76), 527 (4.50). MALDI-TOF mass (C<sub>86</sub>H<sub>66</sub>N<sub>4</sub>S<sub>4</sub>): 1283.423 (M+H)<sup>+</sup>.

**[6]<sup>2+</sup>**: The dicationic species was synthesized via the addition of excess of  $\text{NOSbF}_6$  to a solution of **6** in dichloromethane at  $-20\text{ }^\circ\text{C}$ . Subsequently, the solution was stirred for 5 minutes at the same temperature. A subtle color change from brown to purple indicated the formation of dicationic species **[6]<sup>2+</sup>**. It was further washed with pentane and obtained in quantitative yield (80%).

$^1\text{H NMR}$  (300 MHz,  $\text{CDCl}_3$ , 338K)  $\delta$  13.03 (s, 2H), 12.20 (d,  $J = 13.4\text{ Hz}$ , 4H), 12.05 (d,  $J = 5.0\text{ Hz}$ , 2H), 11.45 (d,  $J = 4.8\text{ Hz}$ , 2H), 11.37 (d,  $J = 4.9\text{ Hz}$ , 2H), 9.59 (d,  $J = 10.7\text{ Hz}$ , 4H), 9.46 (d,  $J = 12.0\text{ Hz}$ , 4H), 8.21 (s, 1H), 7.87 (s, 1H), 4.78 (s, 6H), 4.68 (s, 6H), 4.41 (s, 6H), 4.31 (s, 6H), 4.23 (s, 6H), 4.09 (s, 6H). UV-vis (in  $\text{CH}_2\text{Cl}_2$ ,  $\lambda_{\text{max}}/\text{nm}$ ,  $\log \epsilon$ ) = 524 (4.71), 680 (4.56), 1097 (4.17). HR-MS (ESI-TOF)  $m/z$ :  $[\text{M} + \text{H}]^+$  Calcd for  $(\text{C}_{86}\text{H}_{66}\text{N}_4\text{S}_4)^{2+}$  642.2085; Found 642.2152.

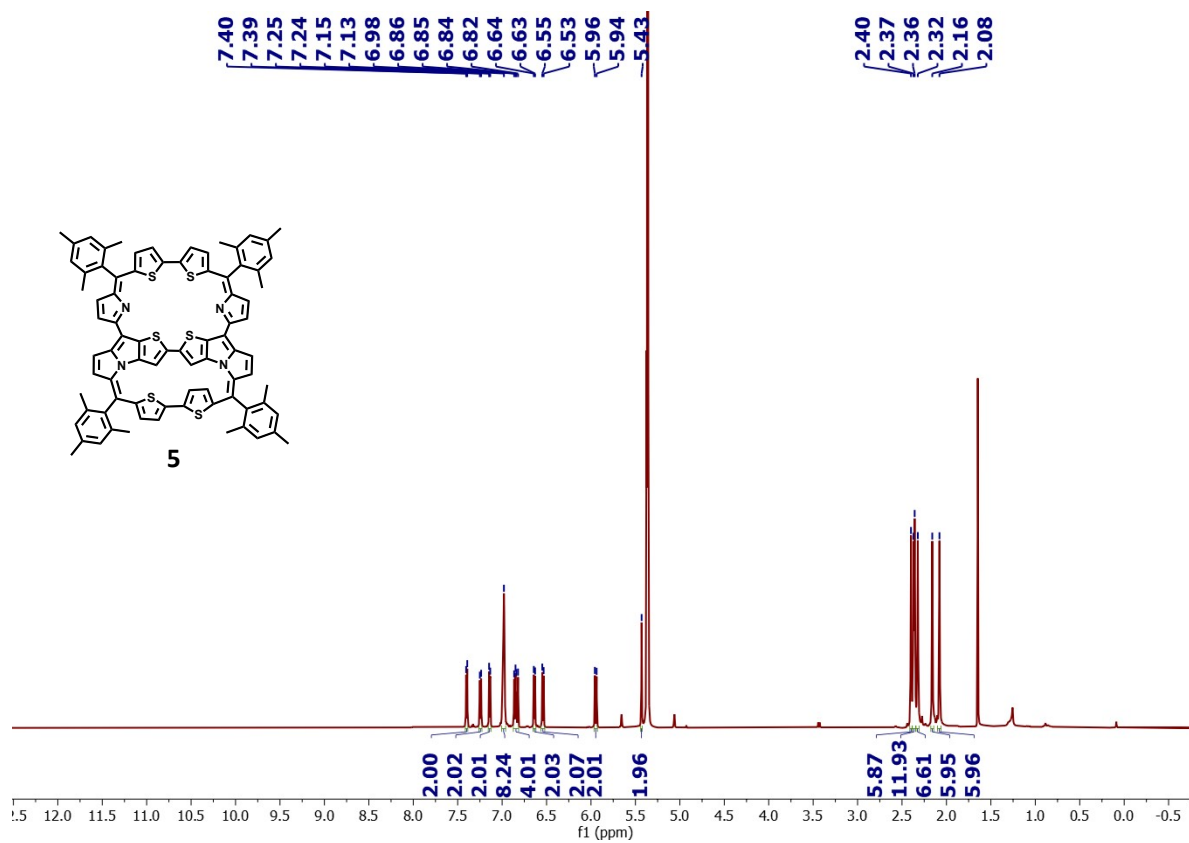

**Figure S1.** <sup>1</sup>H NMR Spectra of compound **5** in CD<sub>2</sub>Cl<sub>2</sub> recorded on a 300 MHz FT-NMR spectrometer at -20 °C.

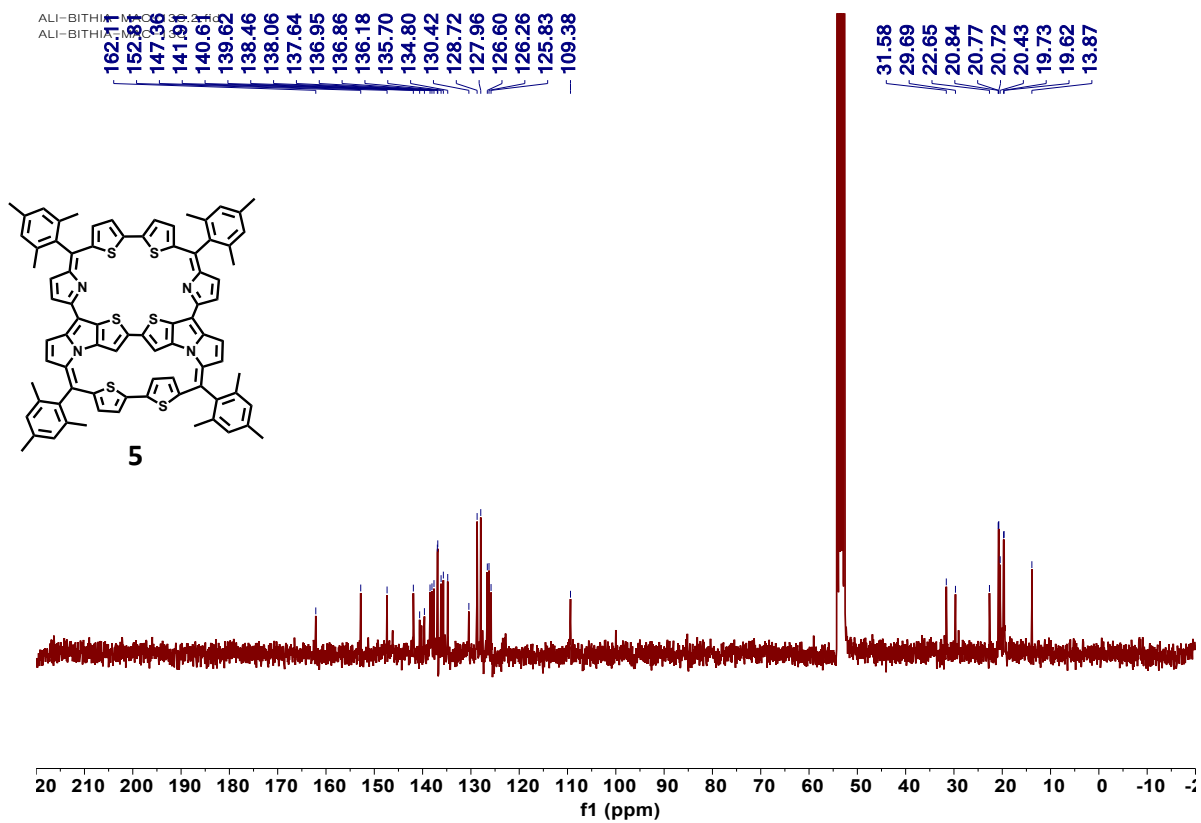

**Figure S2.**  $^{13}\text{C}\{^1\text{H}\}$  NMR spectrum of the macrocycle **5** recorded in  $\text{CD}_2\text{Cl}_2$  on a 400 MHz FT-NMR spectrometer at 25 °C.

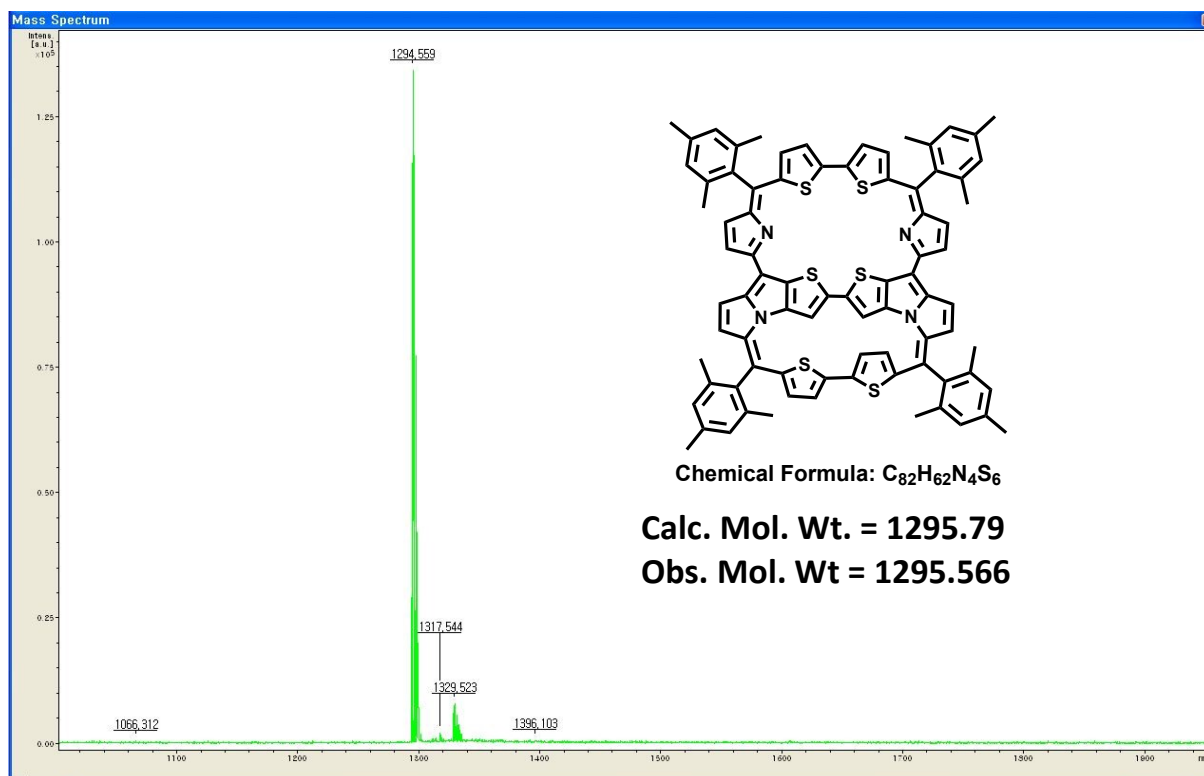

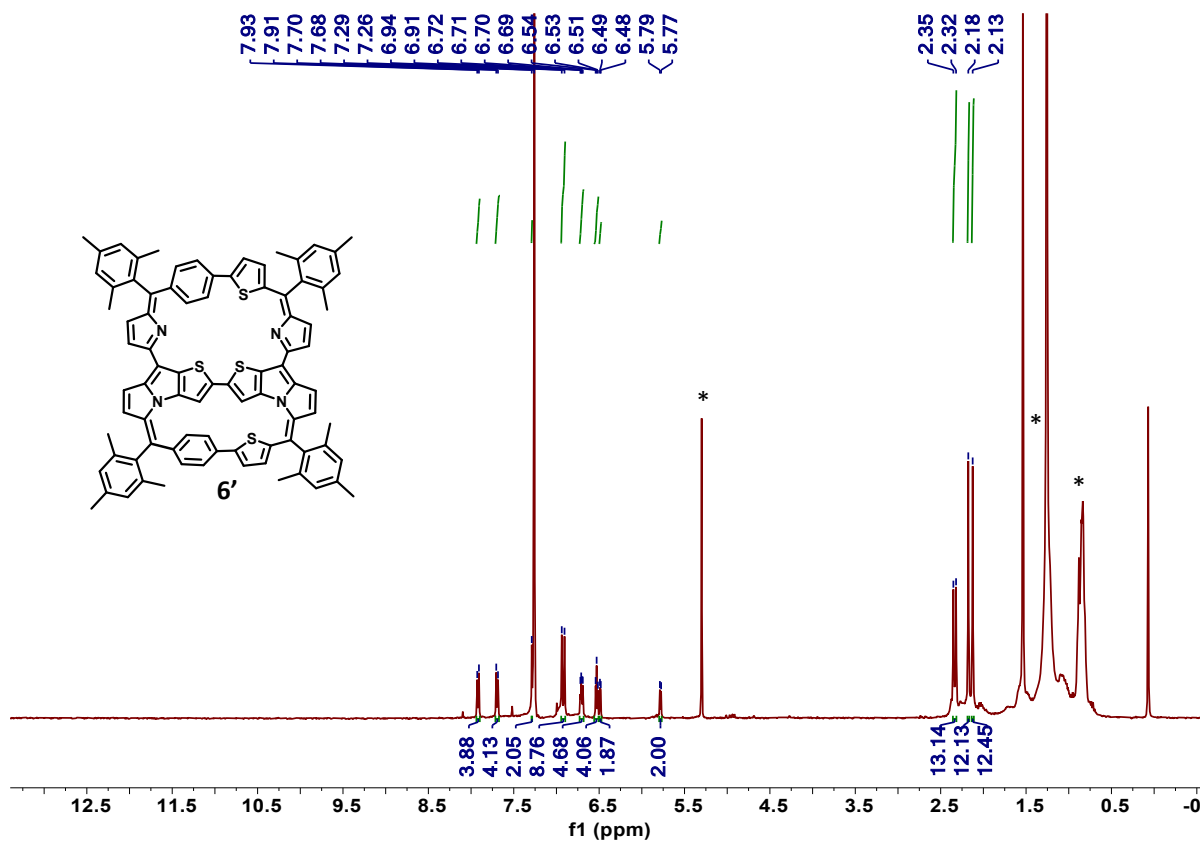

**Figure S4.**  $^1\text{H}$  NMR spectra of compound **6'** recorded in  $\text{CDCl}_3$  on a 400 MHz FT-NMR spectrometer at 25 °C.

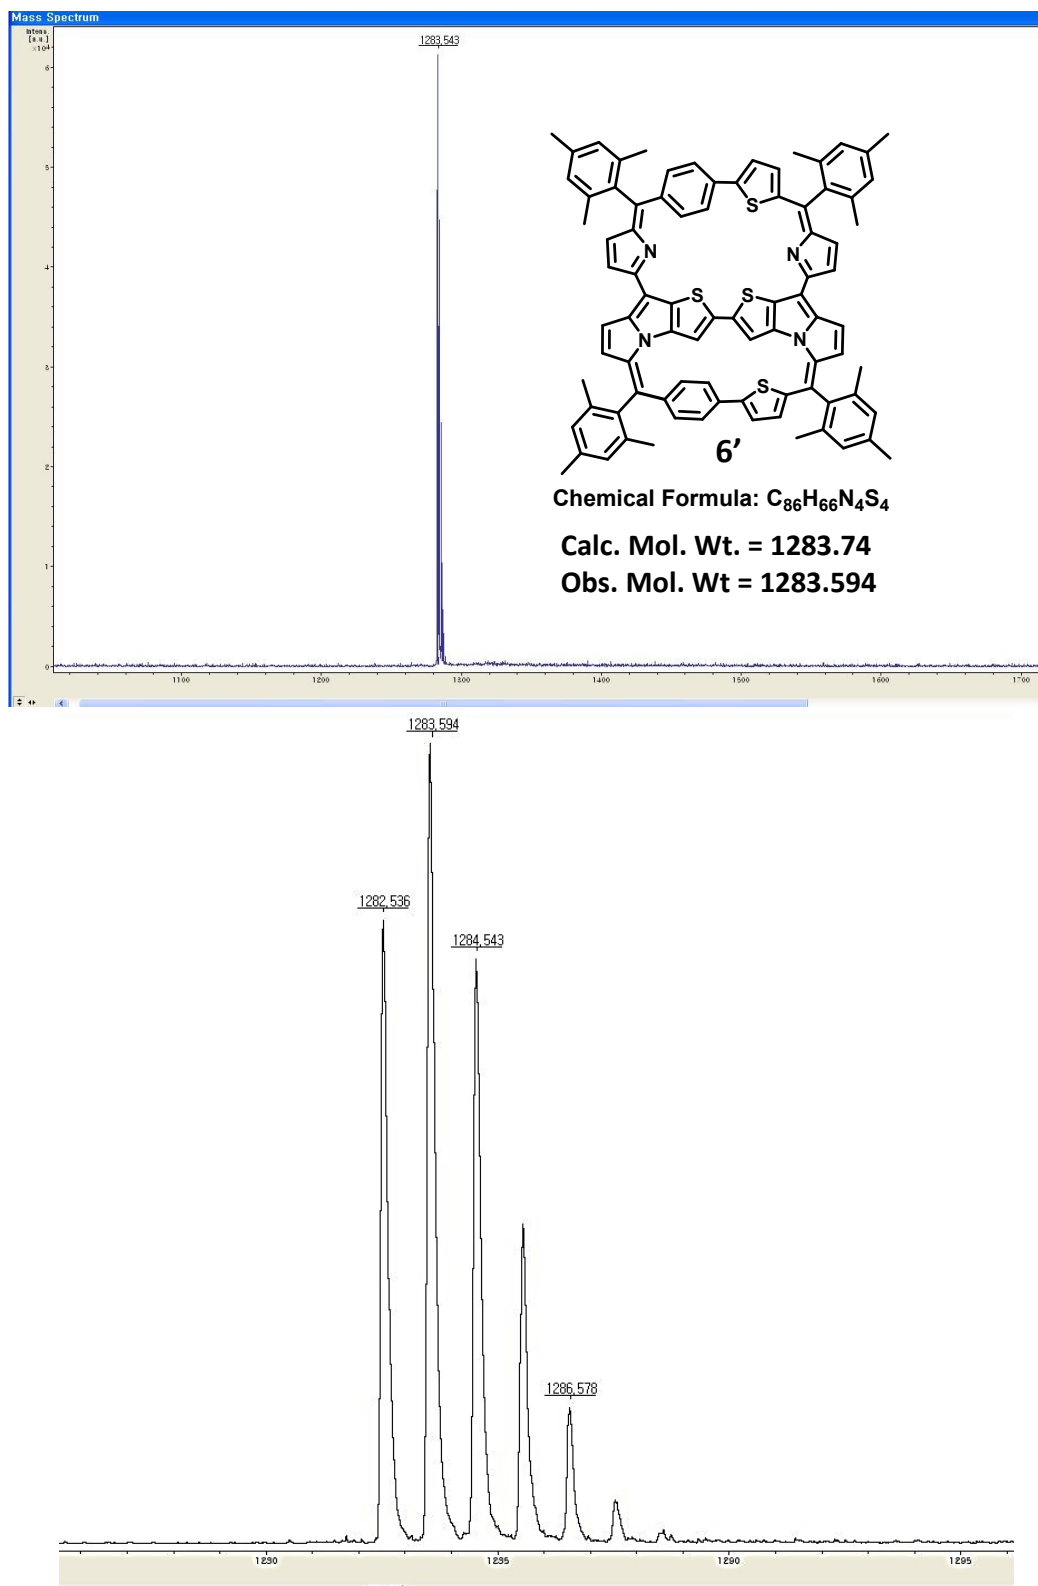

**Figure S5.** MALDI spectrum of compound **6'**.

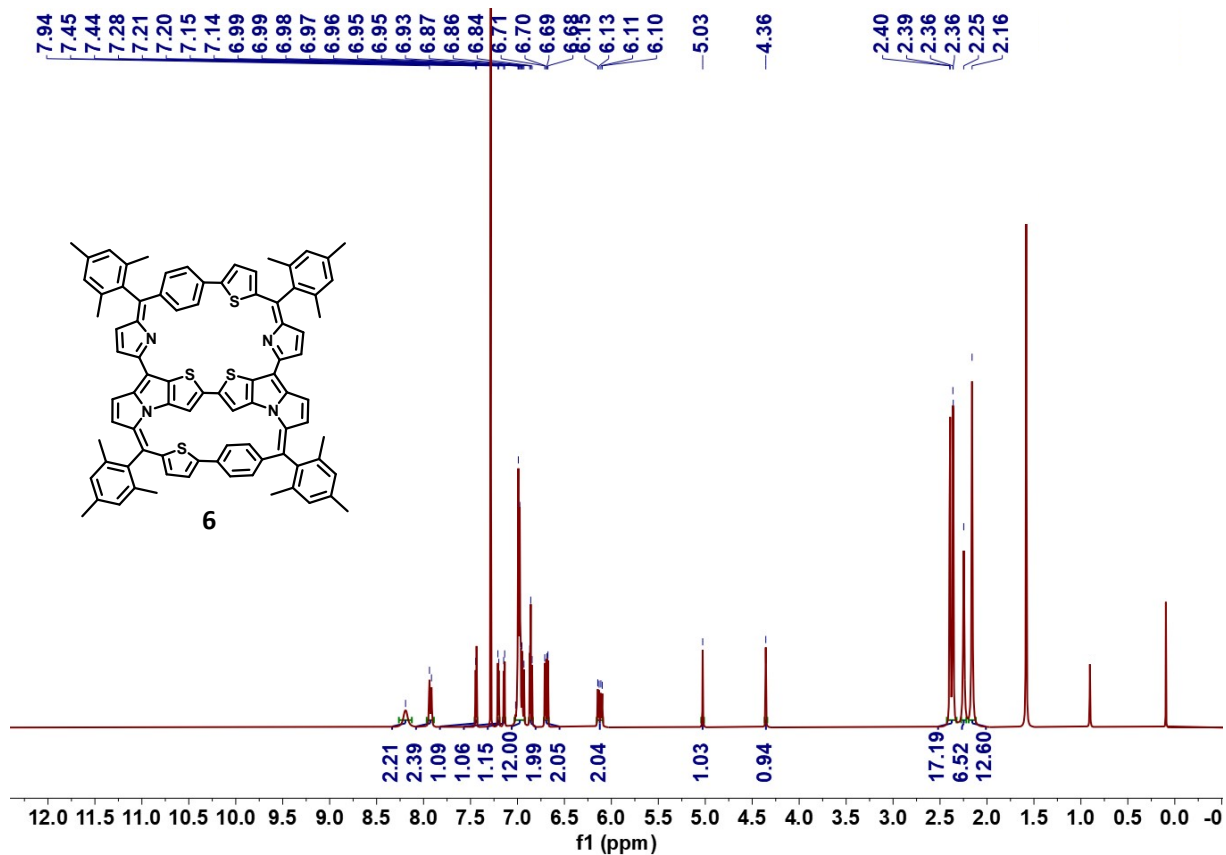

**Figure S6.** <sup>1</sup>H NMR spectra of compound **6** recorded in CDCl<sub>3</sub> on a 400 MHz FT-NMR spectrometer at 25 °C

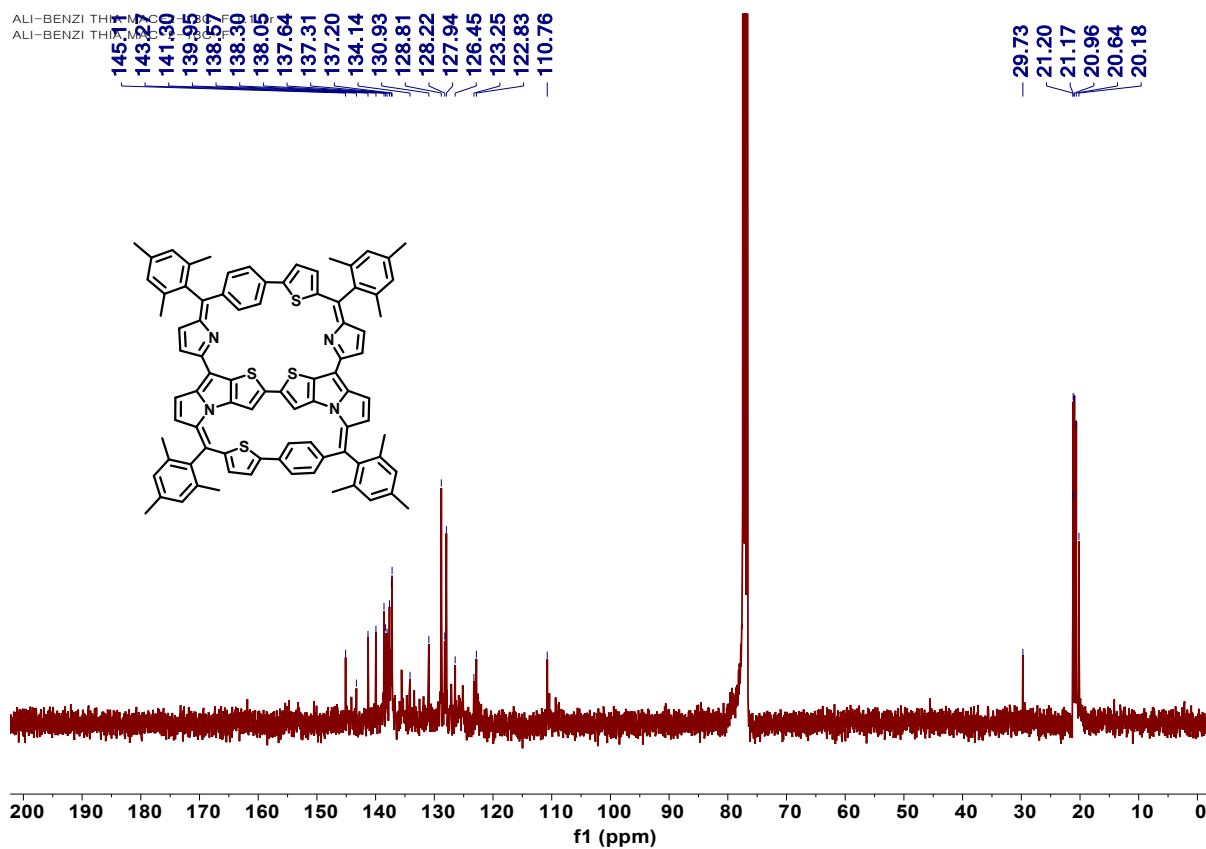

**Figure S7.**  $^{13}\text{C}\{^1\text{H}\}$  NMR spectrum of the macrocycle **6** recorded in  $\text{CD}_2\text{Cl}_2$  on a 400 MHz FT-NMR spectrometer at 25 °C.

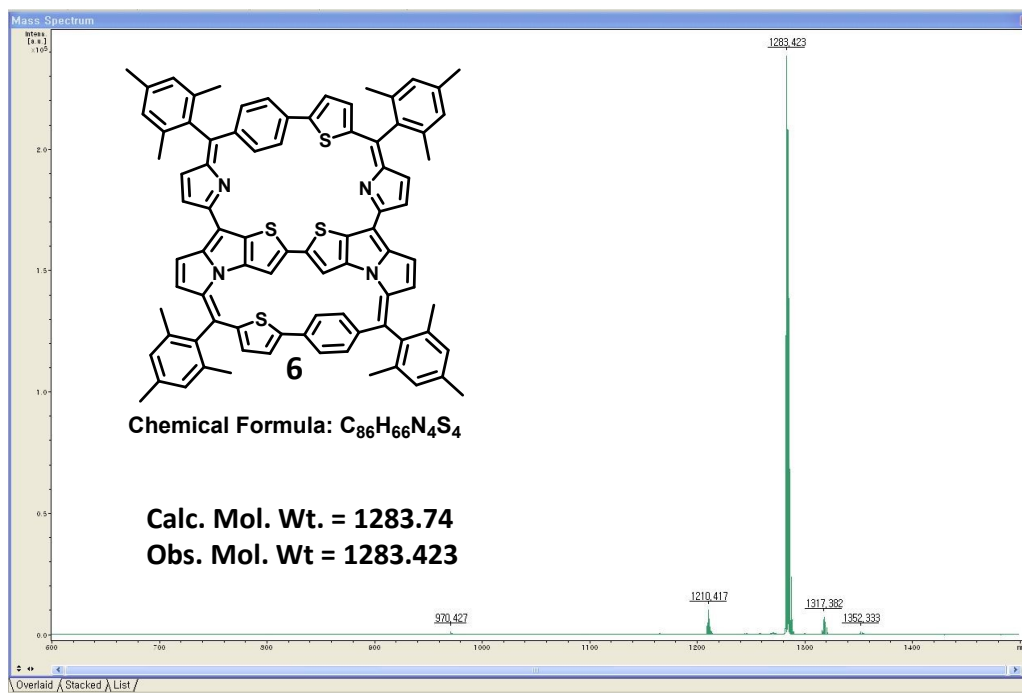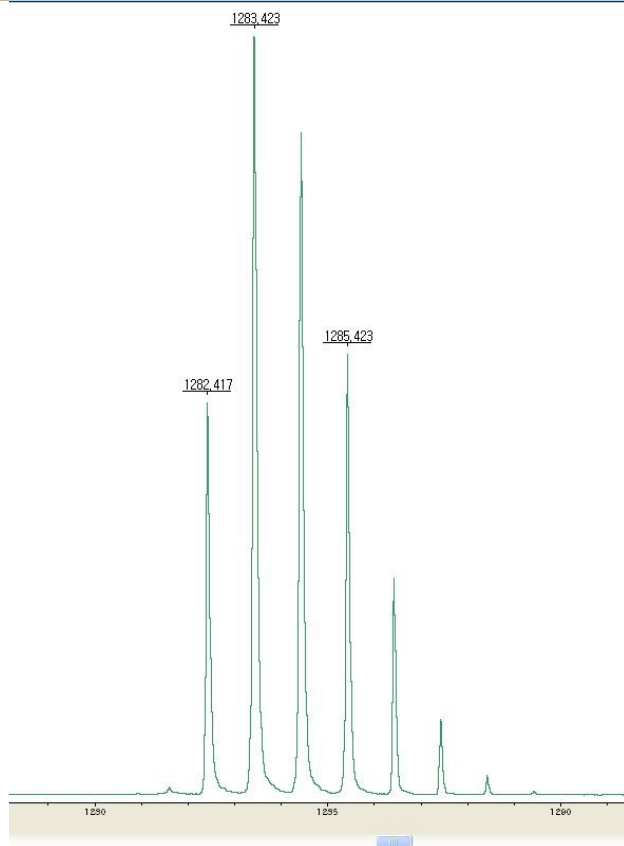

**Figure S8.** HRMS spectrum of compound **6**.

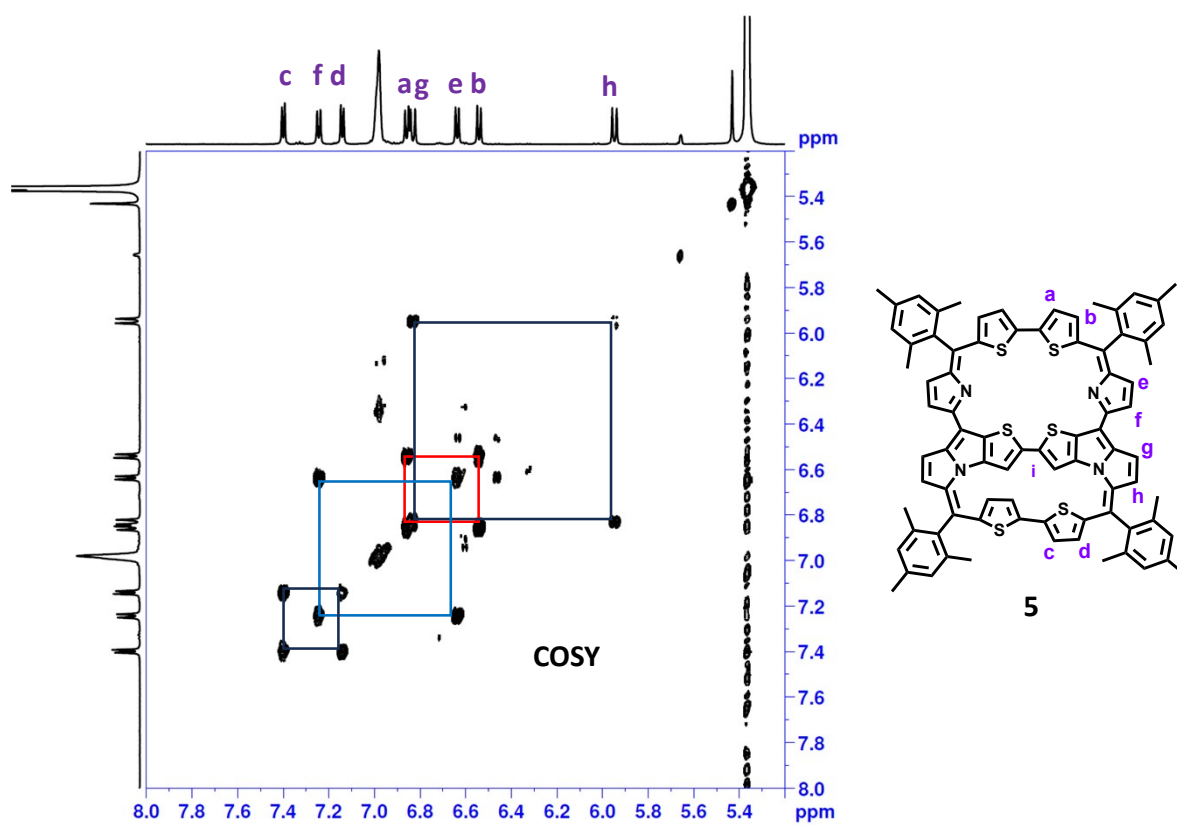

**Figure S9.**  $^1\text{H}$ - $^1\text{H}$  COSY spectrum of compound **5** recorded in  $\text{CD}_2\text{Cl}_2$  at  $-20^\circ\text{C}$ .

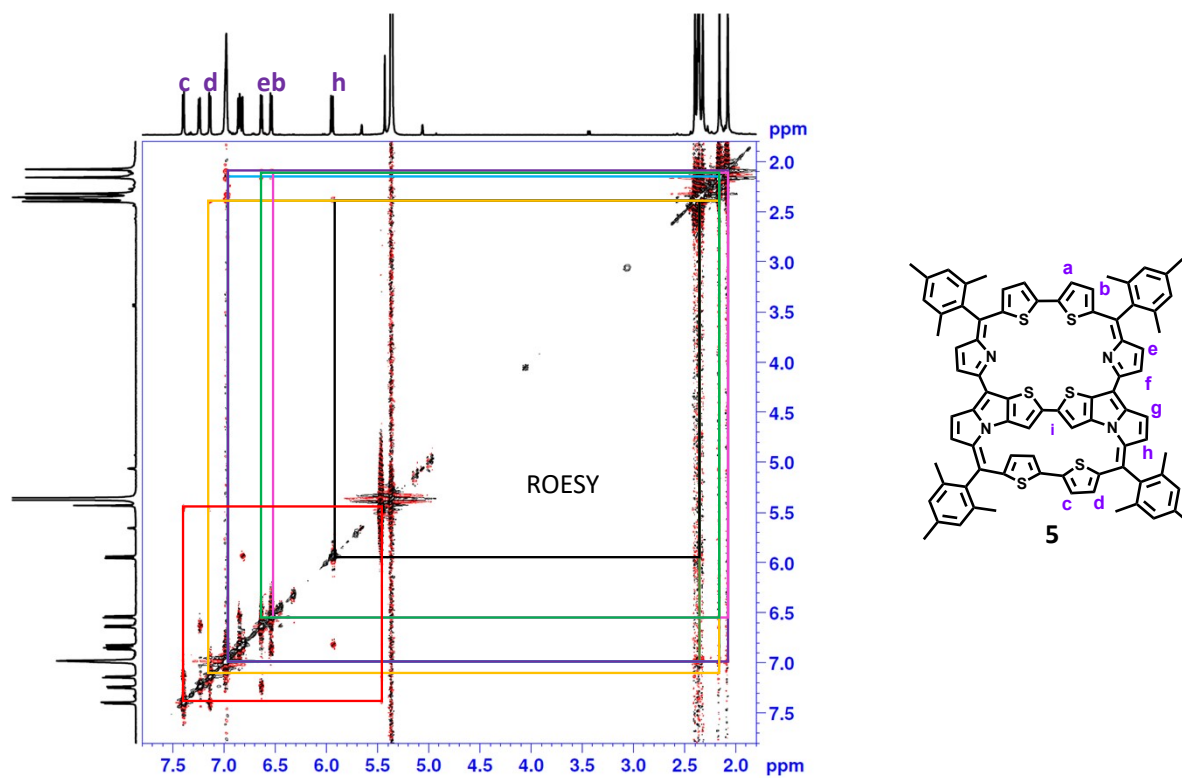

**Figure S10.**  $^1\text{H}$ - $^1\text{H}$  ROESY spectrum of compound **5** recorded in  $\text{CD}_2\text{Cl}_2$  at  $-20\text{ }^\circ\text{C}$ .

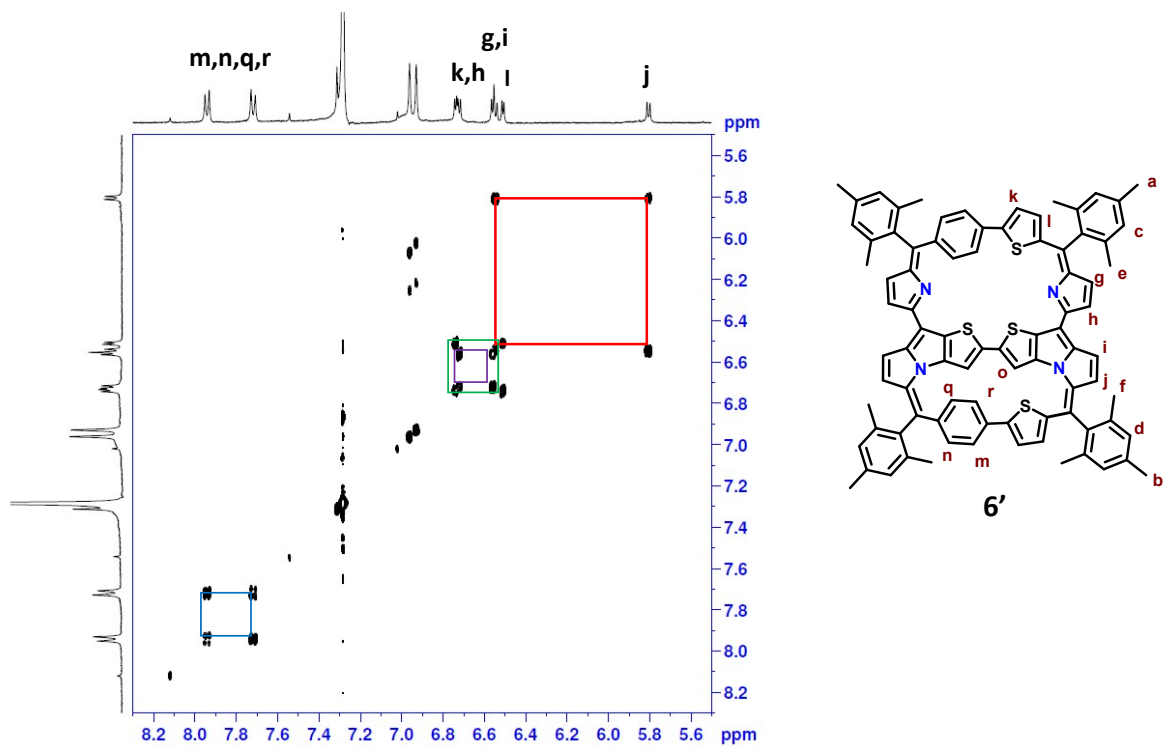

**Figure S11.**  $^1\text{H}$ - $^1\text{H}$  COSY spectrum of compound **6'** recorded in  $\text{CDCl}_3$  at  $25^\circ\text{C}$ .

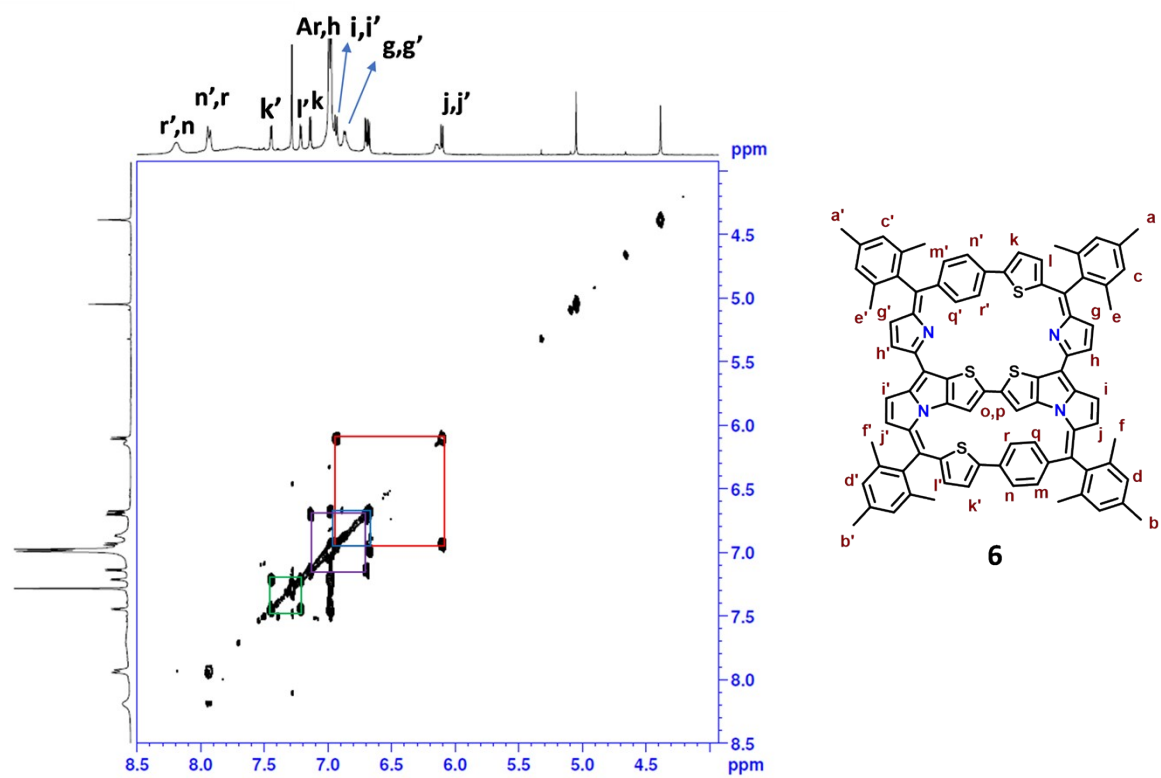

**Figure S12.**  $^1\text{H}$ - $^1\text{H}$  COSY spectrum of compound **6** recorded in  $\text{CDCl}_3$  at  $25^\circ\text{C}$ .

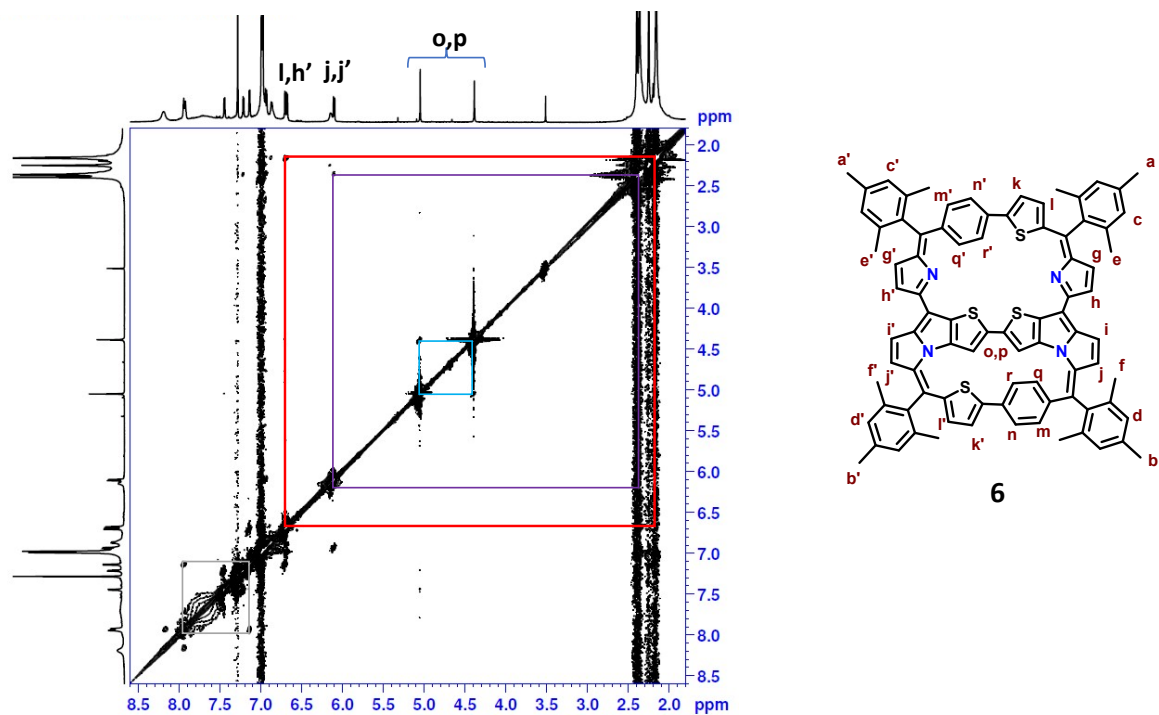

**Figure S13.**  $^1\text{H}$ - $^1\text{H}$  ROESY spectrum of compound **6** recorded in  $\text{CDCl}_3$  at  $25^\circ\text{C}$ .

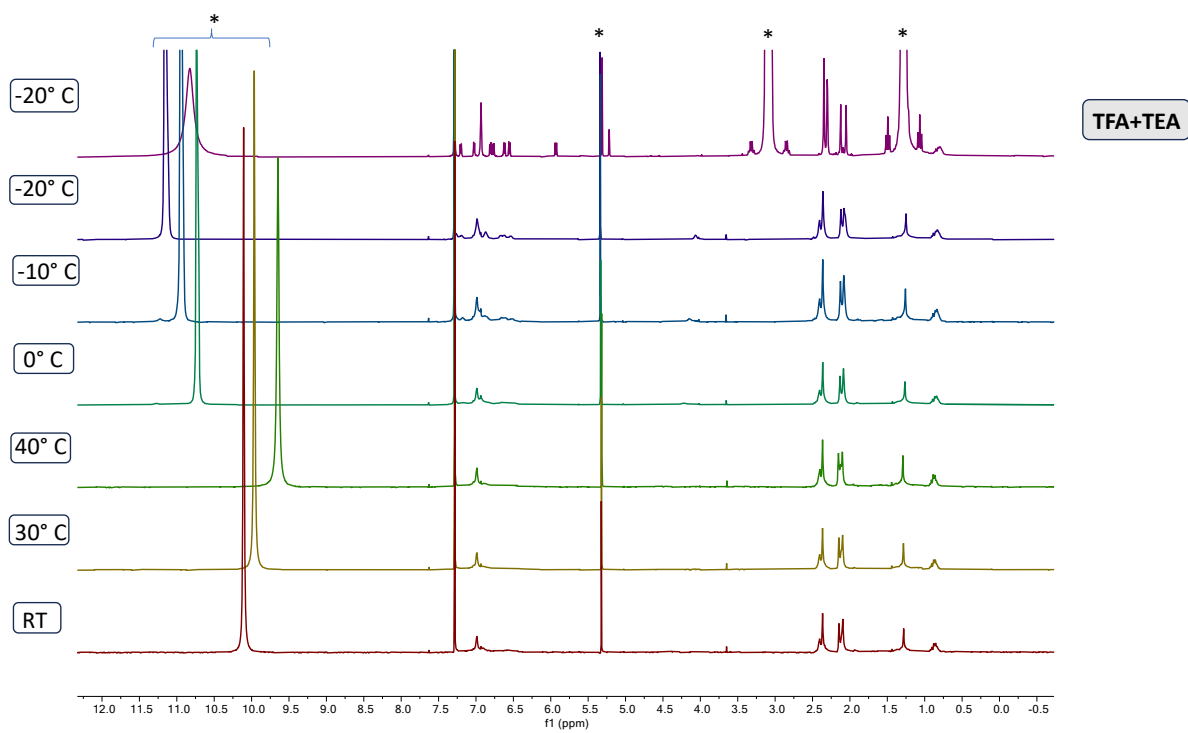

**Figure S14.**  $^1\text{H}$  NMR of **5** recorded in the presence of TFA in  $\text{CDCl}_3$  at different temperatures.

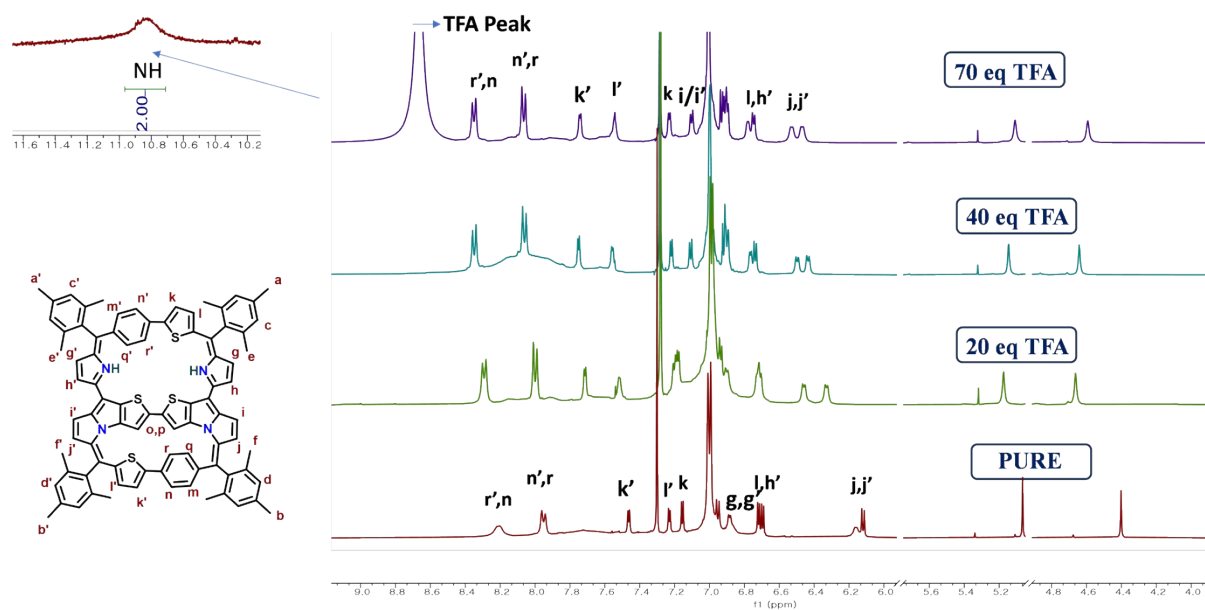

**Figure S15.**  $^1\text{H}$  NMR titration experiment of macrocycle **6** with a dilute solution of TFA in  $\text{CDCl}_3$  at  $25^\circ\text{C}$ .

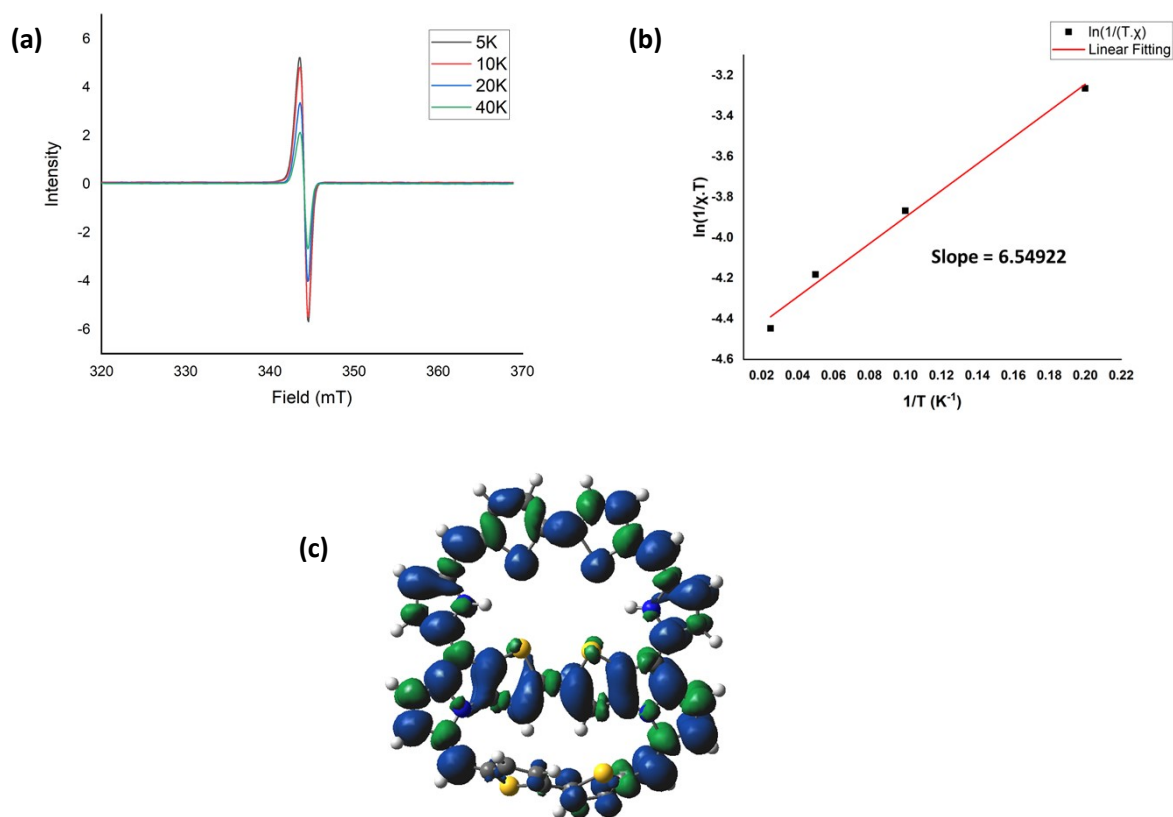

**Figure S16.** (a) EPR spectrum of the protonated form  $5 \cdot 2H^+$  performed in toluene at different temperatures from 5 K to 40 K. (b) Temperature-dependent fit to the Bleaney-Bowers equation with a  $\Delta E_{S-T}$  of 0.013 kcal mol<sup>-1</sup>. (c) Mulliken electron spin density plot of  $5 \cdot 2H^+$  in the  $T_1$  state calculated using UCAM-B3LYP /6-311G(d, p) level of theory.

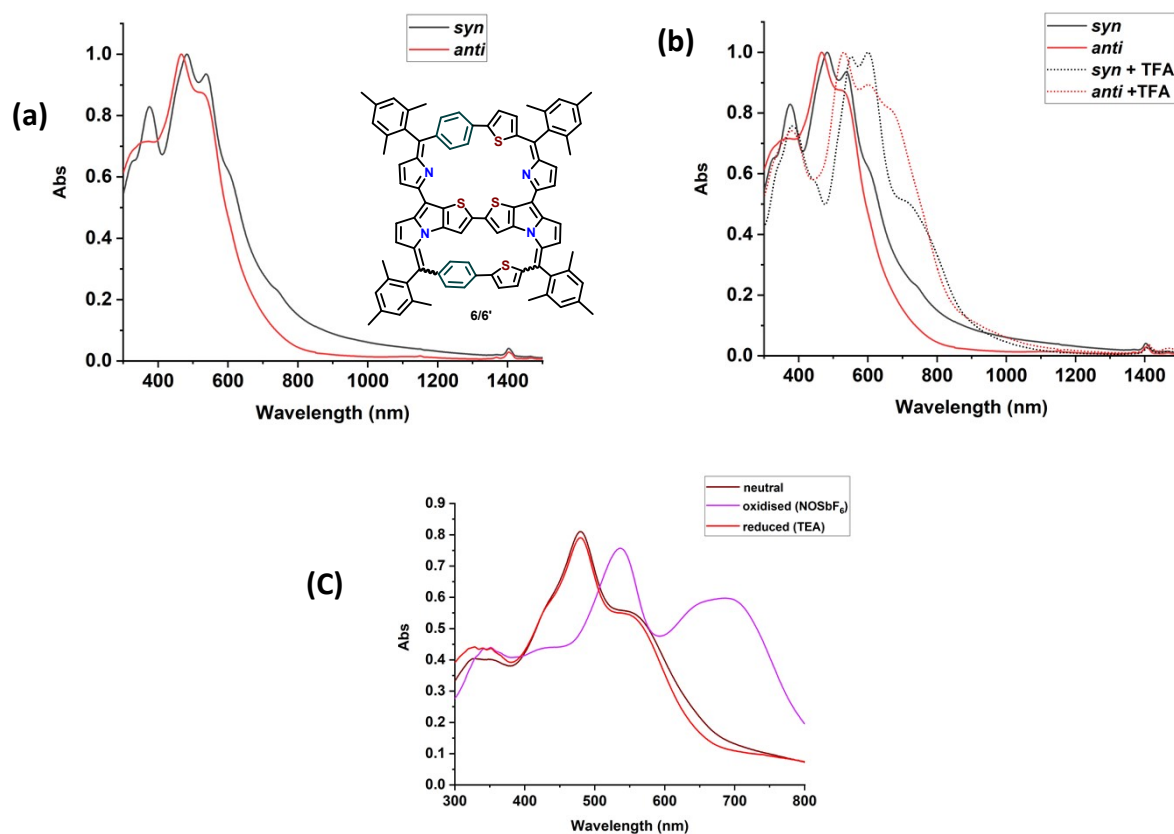

**Figure S17.** (a) Comparison of UV-Vis-NIR spectrum of *syn* (6') and *anti* (6) octaphyrin in  $\text{CH}_2\text{Cl}_2$ . (b) Comparison of UV-Vis-NIR spectrum of neutral *syn* (6') and *anti* (6) octaphyrin with the protonated form (6'•2H<sup>+</sup> and 6•2H<sup>+</sup>) with TFA in  $\text{CH}_2\text{Cl}_2$ . (c) Comparison of UV-Vis-NIR spectra of neutral **5** (brown line), oxidized from [5]<sup>2+</sup> (pink line) and reduced form with triethylamine (TEA) (red line).

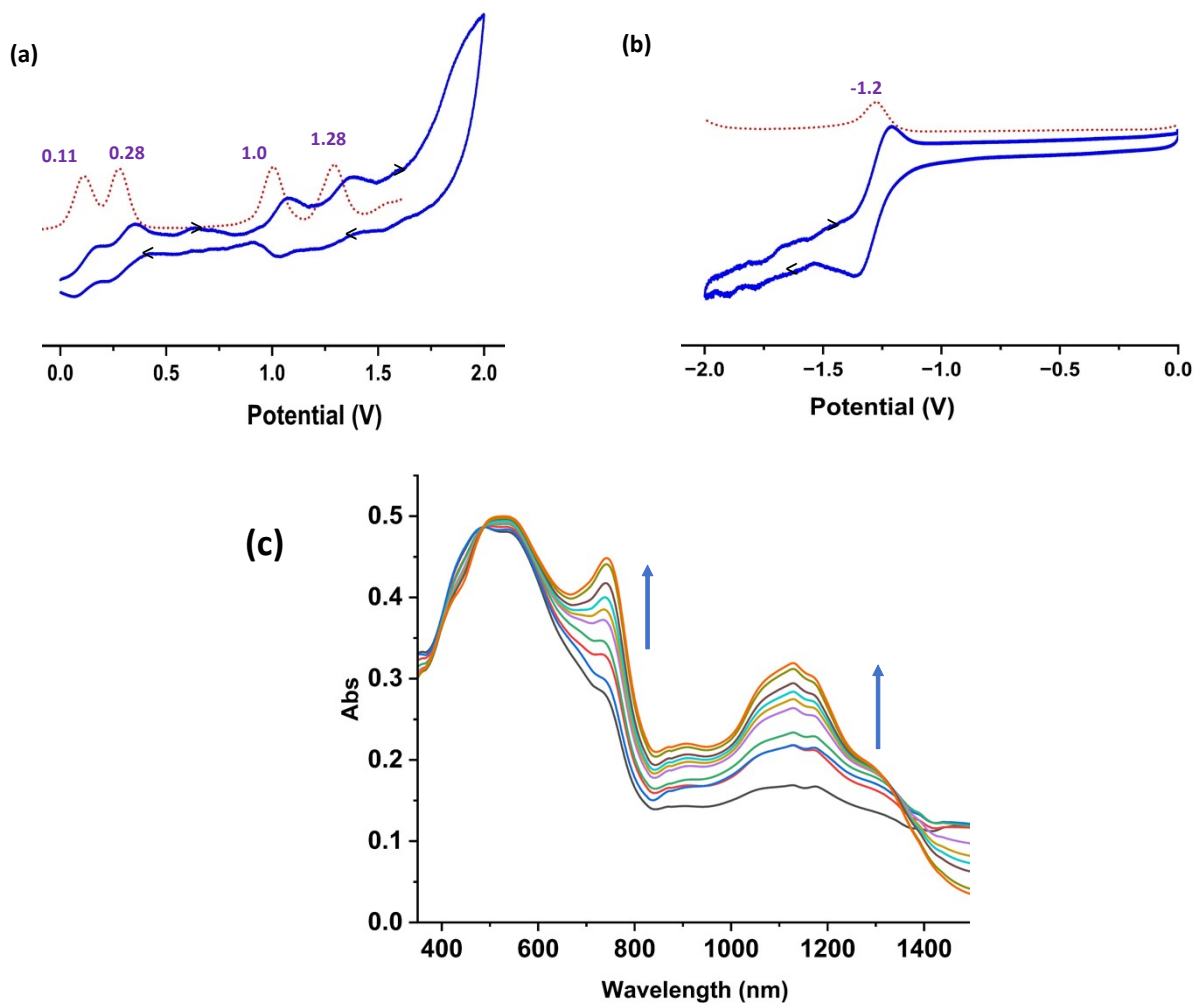

**Figure S18.** Cyclic voltammograms and differential pulse voltammograms upon (a) oxidation and (b) reduction of macrocycle **5** recorded in  $\text{CH}_2\text{Cl}_2$  with  $\text{TBAPF}_6$  (0.1 M) as the supporting electrolyte and  $\text{Ag}/\text{AgNO}_3$  as the reference electrode at a scan rate of 100 mV/s at 25 °C. (c) Oxidative spectroelectrochemical titrations carried out at the second oxidation potential of 0.45 V (the data were recorded at an interval of 60 s).

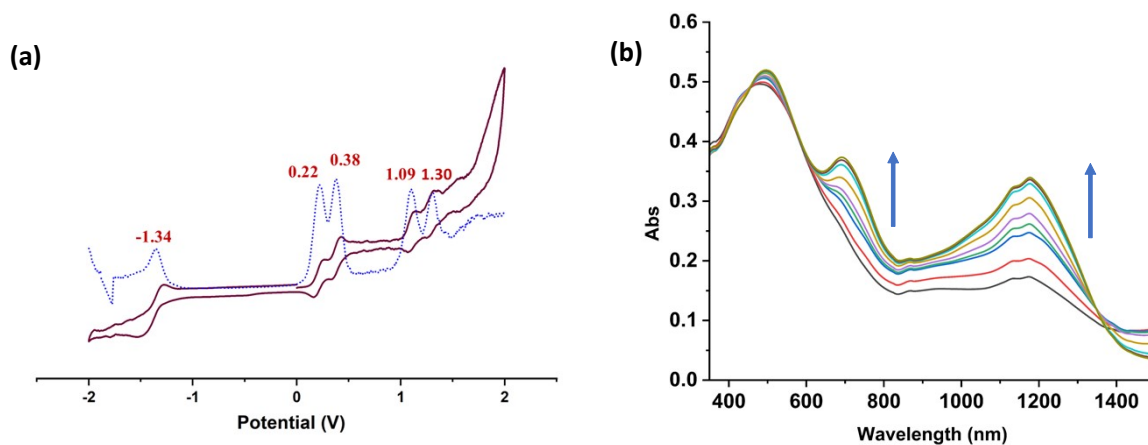

**Figure S19.** (a) Cyclic voltammograms and differential pulse voltammograms of the macrocycle **6** recorded in  $\text{CH}_2\text{Cl}_2$  with  $\text{TBAPF}_6$  (0.1 M) as the supporting electrolyte and  $\text{Ag}/\text{AgNO}_3$  as the reference electrode at a scan rate of 100 mV/s at 25  $^\circ\text{C}$ . (b) Oxidative spectroelectrochemical titrations carried out at the second oxidation potential of 0.51 V (the data were recorded at an interval of 60 s).

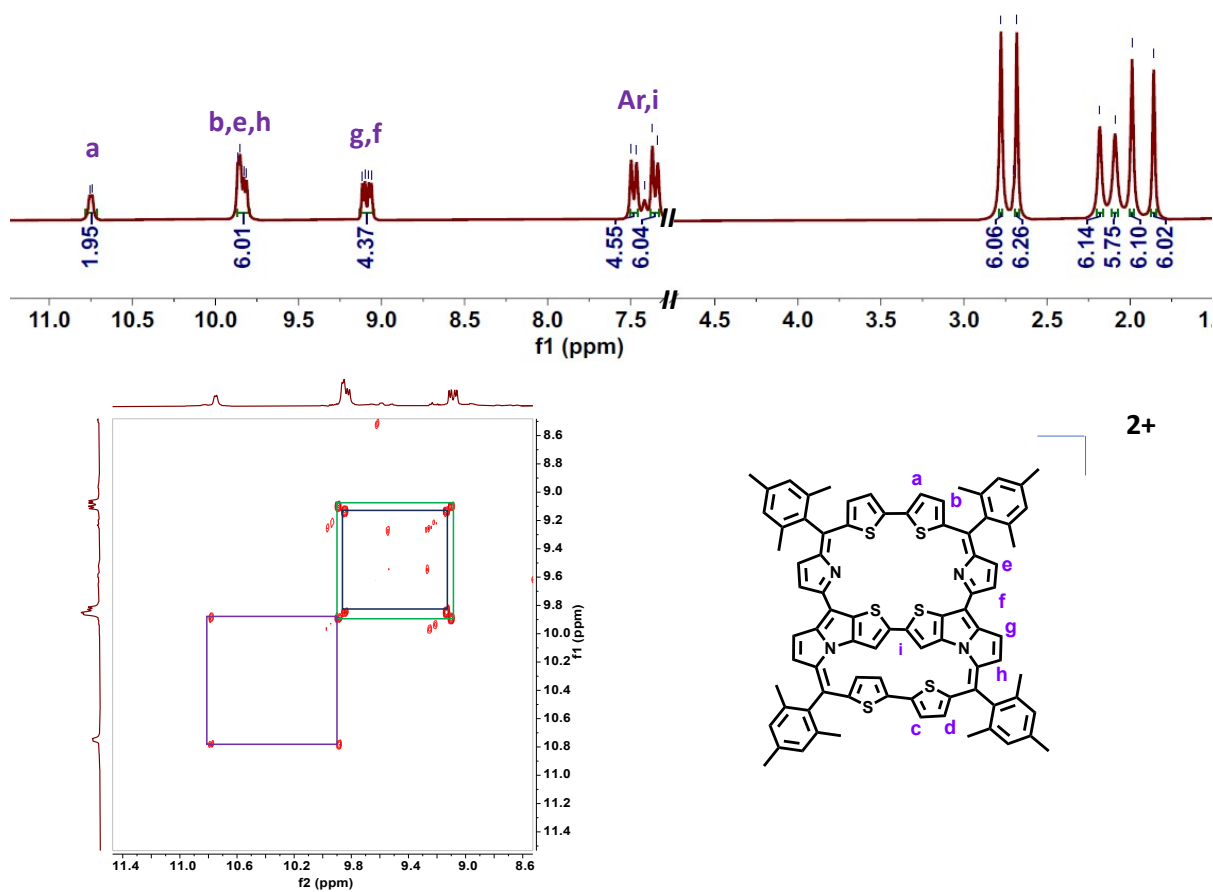

**Figure S20.**  $^1\text{H}$  NMR (expanded) and COSY spectra of compound  $[5]^{2+}$  in  $\text{CDCl}_3$  on 300 MHz FT-NMR spectrometer at  $25^\circ\text{C}$  (solvent impurities were hidden for clarity).



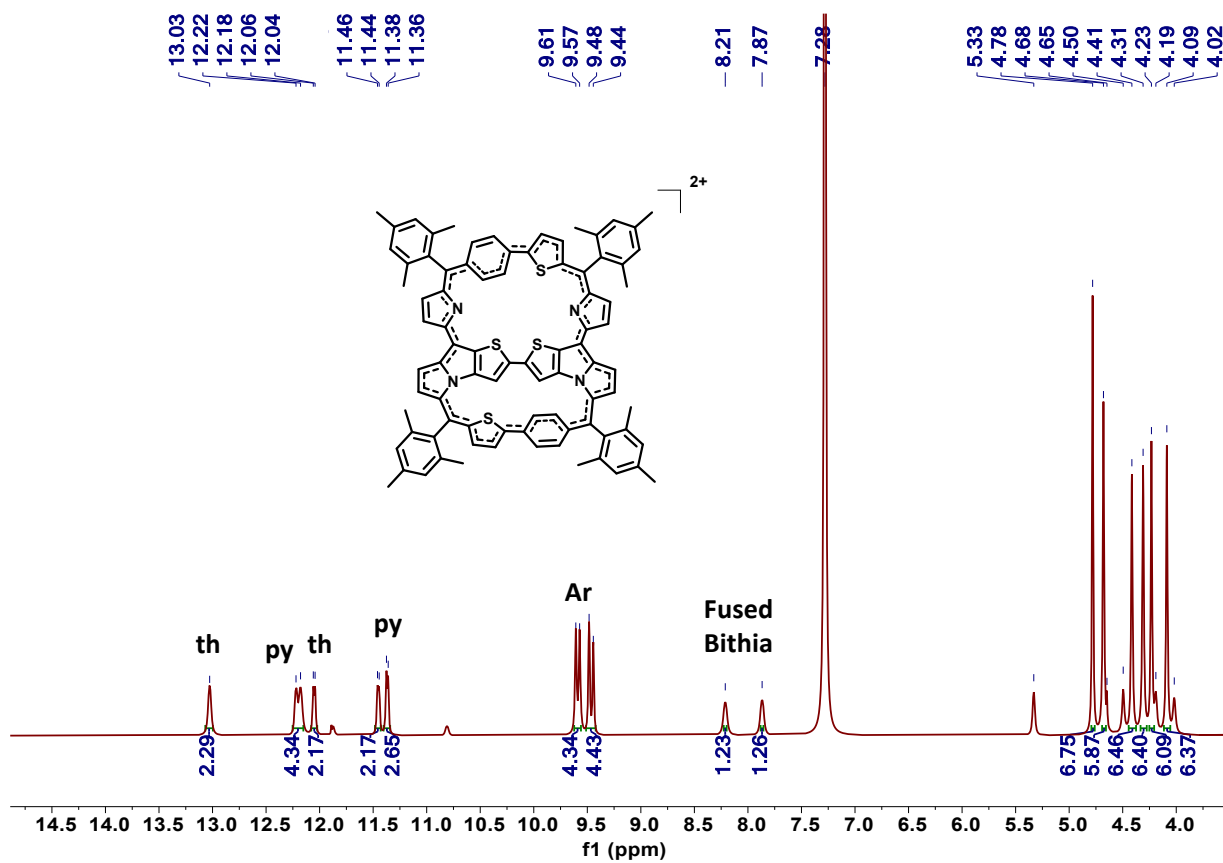

**Figure S22.**  $^1\text{H}$  NMR spectrum of compound  $[\mathbf{6}]^{2+}$  in  $\text{CDCl}_3$  on 300 MHz FT-NMR spectrometer at  $40^\circ\text{C}$ .

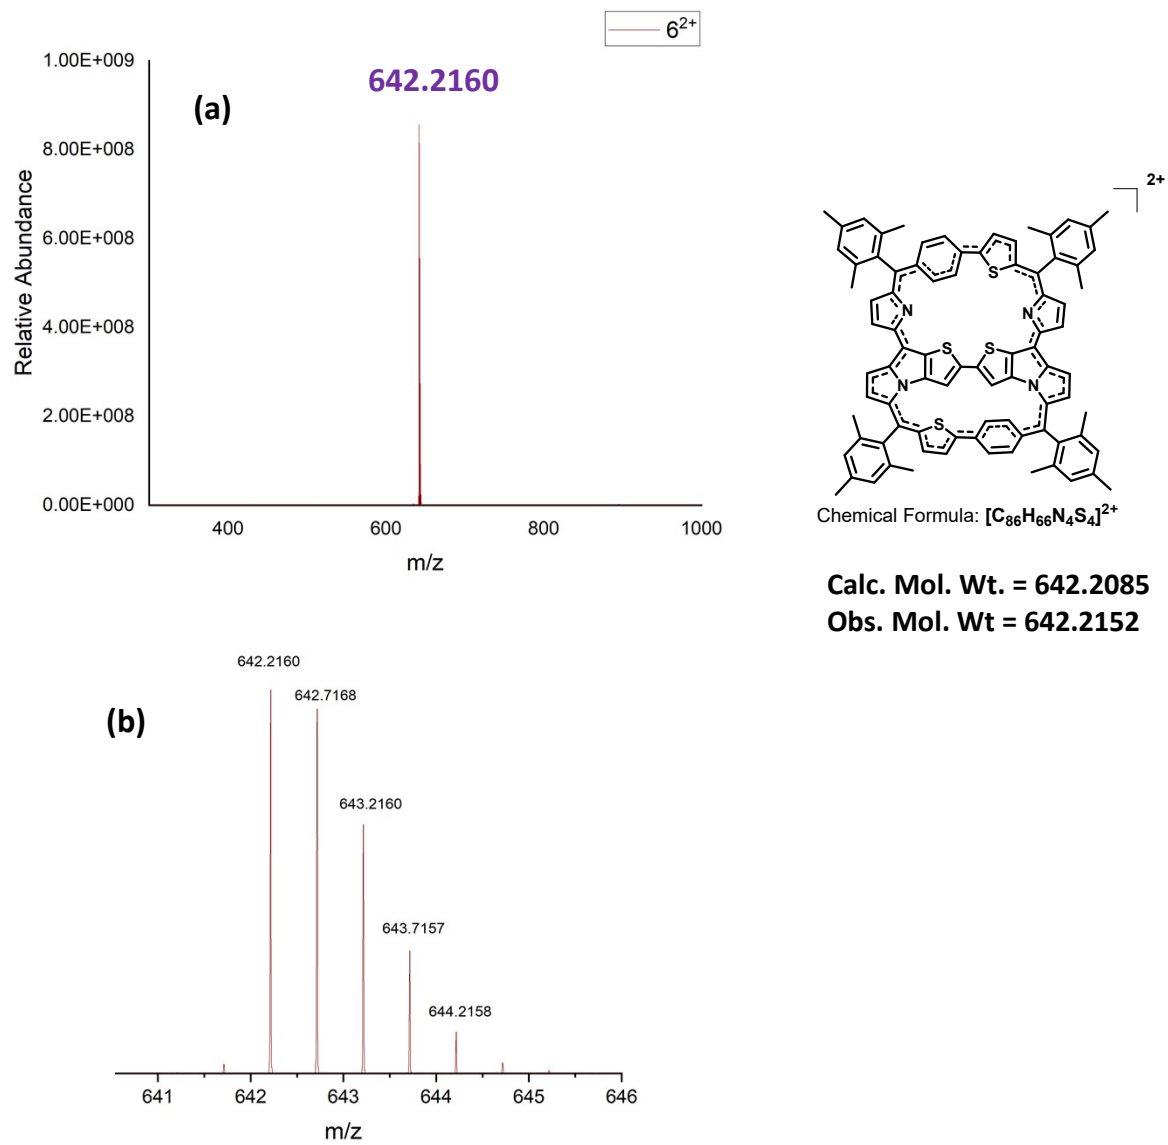

**Figure S23.** HRMS spectrum of oxidized octaphyrin  $[6]^{2+}$  plotted in Origin.

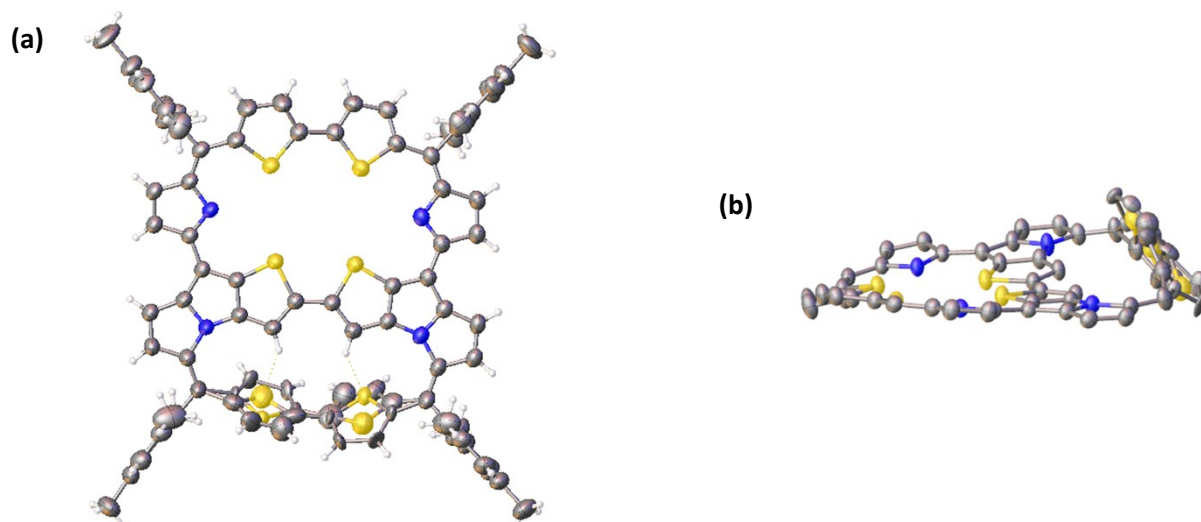

**Figure S24:** (a) X-ray crystal structure of macrocycle **5**. (b) Side view of macrocycle **5** (ellipsoids set at the 50% probability level). [(b) *Meso*-aryls and hydrogen atoms are omitted for clarity.]

**Table S1.** Crystal data for macrocycle **5**.

|                                             |                                                                |
|---------------------------------------------|----------------------------------------------------------------|
| CCDC No                                     | 2432301                                                        |
| Empirical formula                           | C <sub>82</sub> H <sub>62</sub> N <sub>4</sub> S <sub>6</sub>  |
| Formula weight                              | 1295.71                                                        |
| Temperature/K                               | 298                                                            |
| Crystal system                              | monoclinic                                                     |
| Space group                                 | I2/a                                                           |
| a/Å                                         | 16.8793(2)                                                     |
| b/Å                                         | 16.1714(2)                                                     |
| c/Å                                         | 56.9401(9)                                                     |
| α/°                                         | 90                                                             |
| β/°                                         | 92.6640(10)                                                    |
| γ/°                                         | 90                                                             |
| Volume/Å <sup>3</sup>                       | 15525.7(4)                                                     |
| Z                                           | 8                                                              |
| ρ <sub>calc</sub> /g/cm <sup>3</sup>        | 1.109                                                          |
| μ/mm <sup>-1</sup>                          | 1.954                                                          |
| F(000)                                      | 5424.0                                                         |
| Crystal size/mm <sup>3</sup>                | 0.18 × 0.08 × 0.03                                             |
| Radiation                                   | Cu Kα (λ = 1.54184)                                            |
| 2θ range for data collection/°              | 5.682 to 136.494                                               |
| Index ranges                                | -20 ≤ h ≤ 17, -17 ≤ k ≤ 19, -68 ≤ l ≤ 66                       |
| Reflections collected                       | 45317                                                          |
| Independent reflections                     | 13988 [R <sub>int</sub> = 0.0479, R <sub>sigma</sub> = 0.0433] |
| Data/restraints/parameters                  | 13988/130/931                                                  |
| Goodness-of-fit on F <sup>2</sup>           | 1.033                                                          |
| Final R indexes [I ≥ 2σ (I)]                | R <sub>1</sub> = 0.0581, wR <sub>2</sub> = 0.1734              |
| Final R indexes [all data]                  | R <sub>1</sub> = 0.0696, wR <sub>2</sub> = 0.1821              |
| Largest diff. peak/hole / e Å <sup>-3</sup> | 0.44/-0.46                                                     |

**Table S2.** Bond length of crystal 5.

| Atom | Atom | Length/Å |  | Atom | Atom | Length/Å |
|------|------|----------|--|------|------|----------|
| S1   | C1   | 1.739(3) |  | C43  | C44  | 1.373(3) |
| S1   | C4   | 1.728(3) |  | C44  | C45  | 1.410(4) |
| S2   | C5   | 1.731(3) |  | C45  | C46  | 1.390(4) |
| S2   | C8   | 1.741(3) |  | C47  | C48  | 1.398(4) |
| S5   | C39  | 1.703(3) |  | C47  | C52  | 1.406(4) |
| S5   | C42  | 1.750(2) |  | C48  | C49  | 1.379(4) |
| S6   | C43  | 1.752(3) |  | C48  | C53  | 1.509(5) |
| S6   | C46  | 1.700(3) |  | C49  | C50  | 1.381(5) |
| N1   | C34  | 1.320(3) |  | C50  | C51  | 1.372(5) |
| N1   | C37  | 1.392(3) |  | C50  | C54  | 1.524(5) |
| N2   | C10  | 1.400(3) |  | C51  | C52  | 1.393(4) |
| N2   | C13  | 1.316(3) |  | C52  | C55  | 1.495(5) |
| N3   | C29  | 1.418(3) |  | C56  | C57  | 1.407(5) |
| N3   | C32  | 1.395(3) |  | C56  | C61  | 1.390(5) |
| N3   | C40  | 1.404(3) |  | C57  | C58  | 1.388(5) |
| N4   | C15  | 1.389(3) |  | C57  | C62  | 1.487(6) |
| N4   | C18  | 1.430(3) |  | C58  | C59  | 1.366(6) |
| N4   | C45  | 1.411(3) |  | C59  | C60  | 1.379(6) |
| C1   | C2   | 1.376(4) |  | C59  | C63  | 1.505(5) |
| C1   | C38  | 1.444(4) |  | C60  | C61  | 1.391(5) |
| C2   | C3   | 1.385(5) |  | C61  | C64  | 1.510(5) |
| C3   | C4   | 1.373(4) |  | C65  | C66  | 1.391(4) |
| C4   | C5   | 1.451(4) |  | C65  | C70  | 1.393(5) |
| C5   | C6   | 1.380(4) |  | C66  | C67  | 1.385(4) |
| C6   | C7   | 1.376(4) |  | C66  | C71  | 1.495(5) |
| C7   | C8   | 1.376(4) |  | C67  | C68  | 1.388(5) |
| C8   | C9   | 1.445(4) |  | C68  | C69  | 1.369(5) |
| C9   | C10  | 1.359(4) |  | C68  | C72  | 1.513(5) |
| C9   | C47  | 1.501(4) |  | C69  | C70  | 1.379(5) |
| C10  | C11  | 1.454(4) |  | C70  | C73  | 1.518(5) |
| C11  | C12  | 1.336(4) |  | C74  | C75  | 1.389(4) |
| C12  | C13  | 1.457(4) |  | C74  | C79  | 1.394(4) |
| C13  | C14  | 1.434(4) |  | C75  | C76  | 1.395(4) |
| C14  | C15  | 1.397(4) |  | C75  | C80  | 1.505(5) |
| C14  | C46  | 1.427(4) |  | C76  | C77  | 1.374(5) |
| C15  | C16  | 1.433(4) |  | C77  | C78  | 1.353(5) |
| C16  | C17  | 1.335(4) |  | C77  | C81  | 1.521(4) |
| C17  | C18  | 1.459(4) |  | C78  | C79  | 1.392(4) |
| C18  | C19  | 1.355(4) |  | C79  | C82  | 1.500(5) |
| C19  | C56  | 1.504(4) |  | S3A  | C24A | 1.713(7) |
| C19  | C20A | 1.489(6) |  | S3A  | C27A | 1.742(5) |
| C19  | C20B | 1.536(9) |  | S4A  | C20A | 1.761(6) |

|     |      |          |  |      |      |           |
|-----|------|----------|--|------|------|-----------|
| C28 | C29  | 1.341(4) |  | S4A  | C23A | 1.663(11) |
| C28 | C65  | 1.495(4) |  | C20A | C21A | 1.367(8)  |
| C28 | C27A | 1.531(5) |  | C21A | C22A | 1.483(7)  |
| C28 | C27B | 1.516(8) |  | C22A | C23A | 1.412(15) |
| C29 | C30  | 1.458(4) |  | C23A | C24A | 1.460(10) |
| C30 | C31  | 1.346(4) |  | C24A | C25A | 1.326(10) |
| C31 | C32  | 1.418(4) |  | C25A | C26A | 1.472(6)  |
| C32 | C33  | 1.398(4) |  | C26A | C27A | 1.387(8)  |
| C33 | C34  | 1.427(3) |  | S3B  | C24B | 1.704(11) |
| C33 | C39  | 1.420(3) |  | S3B  | C27B | 1.715(9)  |
| C34 | C35  | 1.447(4) |  | S4B  | C20B | 1.663(9)  |
| C35 | C36  | 1.336(4) |  | S4B  | C23B | 1.673(17) |
| C36 | C37  | 1.448(4) |  | C20B | C21B | 1.335(13) |
| C37 | C38  | 1.356(4) |  | C21B | C22B | 1.240(13) |
| C38 | C74  | 1.511(3) |  | C22B | C23B | 1.49(2)   |
| C39 | C40  | 1.387(3) |  | C23B | C24B | 1.451(19) |
| C40 | C41  | 1.404(4) |  | C24B | C25B | 1.371(14) |
| C41 | C42  | 1.370(4) |  | C25B | C26B | 1.239(12) |
| C42 | C43  | 1.448(4) |  | C26B | C27B | 1.314(12) |

**Table S3.** Bond Angles for the macrocycle **5**.

| Atom | Atom | Atom | Angle/°   |  | Atom | Atom | Atom | Angle/°    |
|------|------|------|-----------|--|------|------|------|------------|
| C4   | S1   | C1   | 92.08(13) |  | C46  | C45  | N4   | 106.0(2)   |
| C5   | S2   | C8   | 92.04(13) |  | C46  | C45  | C44  | 112.9(2)   |
| C39  | S5   | C42  | 90.78(12) |  | C14  | C46  | S6   | 136.6(2)   |
| C46  | S6   | C43  | 90.81(12) |  | C45  | C46  | S6   | 112.37(19) |
| C34  | N1   | C37  | 105.4(2)  |  | C45  | C46  | C14  | 111.0(2)   |
| C13  | N2   | C10  | 105.8(2)  |  | C48  | C47  | C9   | 121.2(3)   |
| C32  | N3   | C29  | 109.4(2)  |  | C48  | C47  | C52  | 120.1(3)   |
| C32  | N3   | C40  | 108.3(2)  |  | C52  | C47  | C9   | 118.6(3)   |
| C40  | N3   | C29  | 142.2(2)  |  | C47  | C48  | C53  | 121.0(3)   |
| C15  | N4   | C18  | 109.3(2)  |  | C49  | C48  | C47  | 119.0(3)   |
| C15  | N4   | C45  | 108.1(2)  |  | C49  | C48  | C53  | 120.0(3)   |
| C45  | N4   | C18  | 142.5(2)  |  | C48  | C49  | C50  | 122.2(3)   |
| C2   | C1   | S1   | 109.5(2)  |  | C49  | C50  | C54  | 120.5(4)   |
| C2   | C1   | C38  | 124.7(2)  |  | C51  | C50  | C49  | 118.1(3)   |
| C38  | C1   | S1   | 125.6(2)  |  | C51  | C50  | C54  | 121.4(4)   |
| C1   | C2   | C3   | 114.5(3)  |  | C50  | C51  | C52  | 122.5(3)   |
| C4   | C3   | C2   | 113.1(3)  |  | C47  | C52  | C55  | 121.4(3)   |
| C3   | C4   | S1   | 110.7(2)  |  | C51  | C52  | C47  | 118.1(3)   |
| C3   | C4   | C5   | 123.3(3)  |  | C51  | C52  | C55  | 120.5(3)   |
| C5   | C4   | S1   | 125.9(2)  |  | C57  | C56  | C19  | 119.2(3)   |
| C4   | C5   | S2   | 126.4(2)  |  | C61  | C56  | C19  | 119.9(3)   |
| C6   | C5   | S2   | 110.5(2)  |  | C61  | C56  | C57  | 120.8(3)   |
| C6   | C5   | C4   | 123.2(3)  |  | C56  | C57  | C62  | 122.1(3)   |
| C7   | C6   | C5   | 113.2(3)  |  | C58  | C57  | C56  | 117.9(4)   |
| C8   | C7   | C6   | 114.9(3)  |  | C58  | C57  | C62  | 120.0(3)   |
| C7   | C8   | S2   | 109.3(2)  |  | C59  | C58  | C57  | 122.8(4)   |
| C7   | C8   | C9   | 123.8(2)  |  | C58  | C59  | C60  | 117.8(3)   |
| C9   | C8   | S2   | 126.8(2)  |  | C58  | C59  | C63  | 121.1(4)   |
| C8   | C9   | C47  | 114.4(2)  |  | C60  | C59  | C63  | 121.1(4)   |
| C10  | C9   | C8   | 127.2(2)  |  | C59  | C60  | C61  | 122.7(4)   |
| C10  | C9   | C47  | 118.5(2)  |  | C56  | C61  | C60  | 117.9(3)   |
| N2   | C10  | C11  | 108.9(2)  |  | C56  | C61  | C64  | 122.0(3)   |
| C9   | C10  | N2   | 125.1(2)  |  | C60  | C61  | C64  | 120.1(4)   |
| C9   | C10  | C11  | 125.9(2)  |  | C66  | C65  | C28  | 119.9(3)   |
| C12  | C11  | C10  | 107.2(2)  |  | C66  | C65  | C70  | 119.7(3)   |
| C11  | C12  | C13  | 106.0(2)  |  | C70  | C65  | C28  | 120.4(3)   |
| N2   | C13  | C12  | 112.2(2)  |  | C65  | C66  | C71  | 121.2(3)   |
| N2   | C13  | C14  | 120.6(2)  |  | C67  | C66  | C65  | 119.1(3)   |
| C14  | C13  | C12  | 127.1(2)  |  | C67  | C66  | C71  | 119.7(3)   |
| C15  | C14  | C13  | 130.3(2)  |  | C66  | C67  | C68  | 121.7(3)   |

|      |     |      |          |  |      |      |      |          |
|------|-----|------|----------|--|------|------|------|----------|
| C15  | C14 | C46  | 104.1(2) |  | C67  | C68  | C72  | 120.1(4) |
| C46  | C14 | C13  | 125.3(2) |  | C69  | C68  | C67  | 117.8(3) |
| N4   | C15 | C14  | 110.7(2) |  | C69  | C68  | C72  | 122.1(4) |
| N4   | C15 | C16  | 107.6(2) |  | C68  | C69  | C70  | 122.3(3) |
| C14  | C15 | C16  | 141.7(3) |  | C65  | C70  | C73  | 122.0(3) |
| C17  | C16 | C15  | 108.6(2) |  | C69  | C70  | C65  | 119.3(3) |
| C16  | C17 | C18  | 110.4(2) |  | C69  | C70  | C73  | 118.8(4) |
| N4   | C18 | C17  | 104.1(2) |  | C75  | C74  | C38  | 120.1(2) |
| C19  | C18 | N4   | 131.4(2) |  | C75  | C74  | C79  | 119.9(2) |
| C19  | C18 | C17  | 124.4(2) |  | C79  | C74  | C38  | 119.9(3) |
| C18  | C19 | C56  | 118.1(3) |  | C74  | C75  | C76  | 118.9(3) |
| C18  | C19 | C20A | 130.3(3) |  | C74  | C75  | C80  | 122.2(3) |
| C18  | C19 | C20B | 114.7(4) |  | C76  | C75  | C80  | 118.9(3) |
| C56  | C19 | C20B | 125.1(4) |  | C77  | C76  | C75  | 121.6(4) |
| C20A | C19 | C56  | 110.3(3) |  | C76  | C77  | C81  | 119.6(4) |
| C29  | C28 | C65  | 120.4(2) |  | C78  | C77  | C76  | 118.4(3) |
| C29  | C28 | C27A | 117.7(3) |  | C78  | C77  | C81  | 122.0(4) |
| C29  | C28 | C27B | 124.8(3) |  | C77  | C78  | C79  | 122.7(3) |
| C65  | C28 | C27A | 120.0(3) |  | C74  | C79  | C82  | 121.3(3) |
| C65  | C28 | C27B | 109.5(3) |  | C78  | C79  | C74  | 118.4(3) |
| N3   | C29 | C30  | 104.5(2) |  | C78  | C79  | C82  | 120.3(3) |
| C28  | C29 | N3   | 129.6(2) |  | C24A | S3A  | C27A | 91.8(3)  |
| C28  | C29 | C30  | 125.8(3) |  | C23A | S4A  | C20A | 93.9(5)  |
| C31  | C30 | C29  | 109.7(2) |  | C19  | C20A | S4A  | 115.5(4) |
| C30  | C31 | C32  | 108.8(2) |  | C21A | C20A | C19  | 132.1(5) |
| N3   | C32 | C31  | 107.5(2) |  | C21A | C20A | S4A  | 111.6(4) |
| N3   | C32 | C33  | 110.0(2) |  | C20A | C21A | C22A | 108.9(5) |
| C33  | C32 | C31  | 142.4(2) |  | C23A | C22A | C21A | 114.1(5) |
| C32  | C33 | C34  | 128.8(2) |  | C22A | C23A | S4A  | 109.9(5) |
| C32  | C33 | C39  | 104.5(2) |  | C22A | C23A | C24A | 126.5(9) |
| C39  | C33 | C34  | 126.7(2) |  | C24A | C23A | S4A  | 123.5(9) |
| N1   | C34 | C33  | 121.0(2) |  | C23A | C24A | S3A  | 119.1(8) |
| N1   | C34 | C35  | 112.0(2) |  | C25A | C24A | S3A  | 112.5(4) |
| C33  | C34 | C35  | 127.0(2) |  | C25A | C24A | C23A | 127.0(8) |
| C36  | C35 | C34  | 106.5(2) |  | C24A | C25A | C26A | 114.3(5) |
| C35  | C36 | C37  | 106.5(2) |  | C27A | C26A | C25A | 109.4(4) |
| N1   | C37 | C36  | 109.6(2) |  | C28  | C27A | S3A  | 115.9(4) |
| C38  | C37 | N1   | 124.4(2) |  | C26A | C27A | C28  | 131.9(4) |
| C38  | C37 | C36  | 126.0(2) |  | C26A | C27A | S3A  | 112.0(3) |
| C1   | C38 | C74  | 114.8(2) |  | C24B | S3B  | C27B | 92.9(5)  |
| C37  | C38 | C1   | 125.3(2) |  | C20B | S4B  | C23B | 95.9(8)  |
| C37  | C38 | C74  | 119.8(2) |  | C19  | C20B | S4B  | 114.6(6) |
| C33  | C39 | S5   | 137.2(2) |  | C21B | C20B | C19  | 141.4(9) |

|     |     |     |                |  |      |      |      |           |
|-----|-----|-----|----------------|--|------|------|------|-----------|
| C40 | C39 | S5  | 111.69(19<br>) |  | C21B | C20B | S4B  | 103.6(8)  |
| C40 | C39 | C33 | 111.1(2)       |  | C22B | C21B | C20B | 127.0(13) |
| C39 | C40 | N3  | 106.2(2)       |  | C21B | C22B | C23B | 105.9(13) |
| C39 | C40 | C41 | 113.9(2)       |  | C22B | C23B | S4B  | 107.5(12) |
| C41 | C40 | N3  | 139.9(2)       |  | C24B | C23B | S4B  | 127.7(12) |
| C42 | C41 | C40 | 111.1(2)       |  | C24B | C23B | C22B | 118.9(14) |
| C41 | C42 | S5  | 112.52(19<br>) |  | C23B | C24B | S3B  | 129.4(11) |
| C41 | C42 | C43 | 128.2(2)       |  | C25B | C24B | S3B  | 109.5(9)  |
| C43 | C42 | S5  | 119.00(19<br>) |  | C25B | C24B | C23B | 120.7(11) |
| C42 | C43 | S6  | 118.42(18<br>) |  | C26B | C25B | C24B | 107.8(12) |
| C44 | C43 | S6  | 112.17(19<br>) |  | C25B | C26B | C27B | 127.6(13) |
| C44 | C43 | C42 | 129.2(2)       |  | C28  | C27B | S3B  | 111.4(6)  |
| C43 | C44 | C45 | 111.6(2)       |  | C26B | C27B | C28  | 146.0(9)  |
| C44 | C45 | N4  | 141.0(2)       |  | C26B | C27B | S3B  | 101.5(8)  |

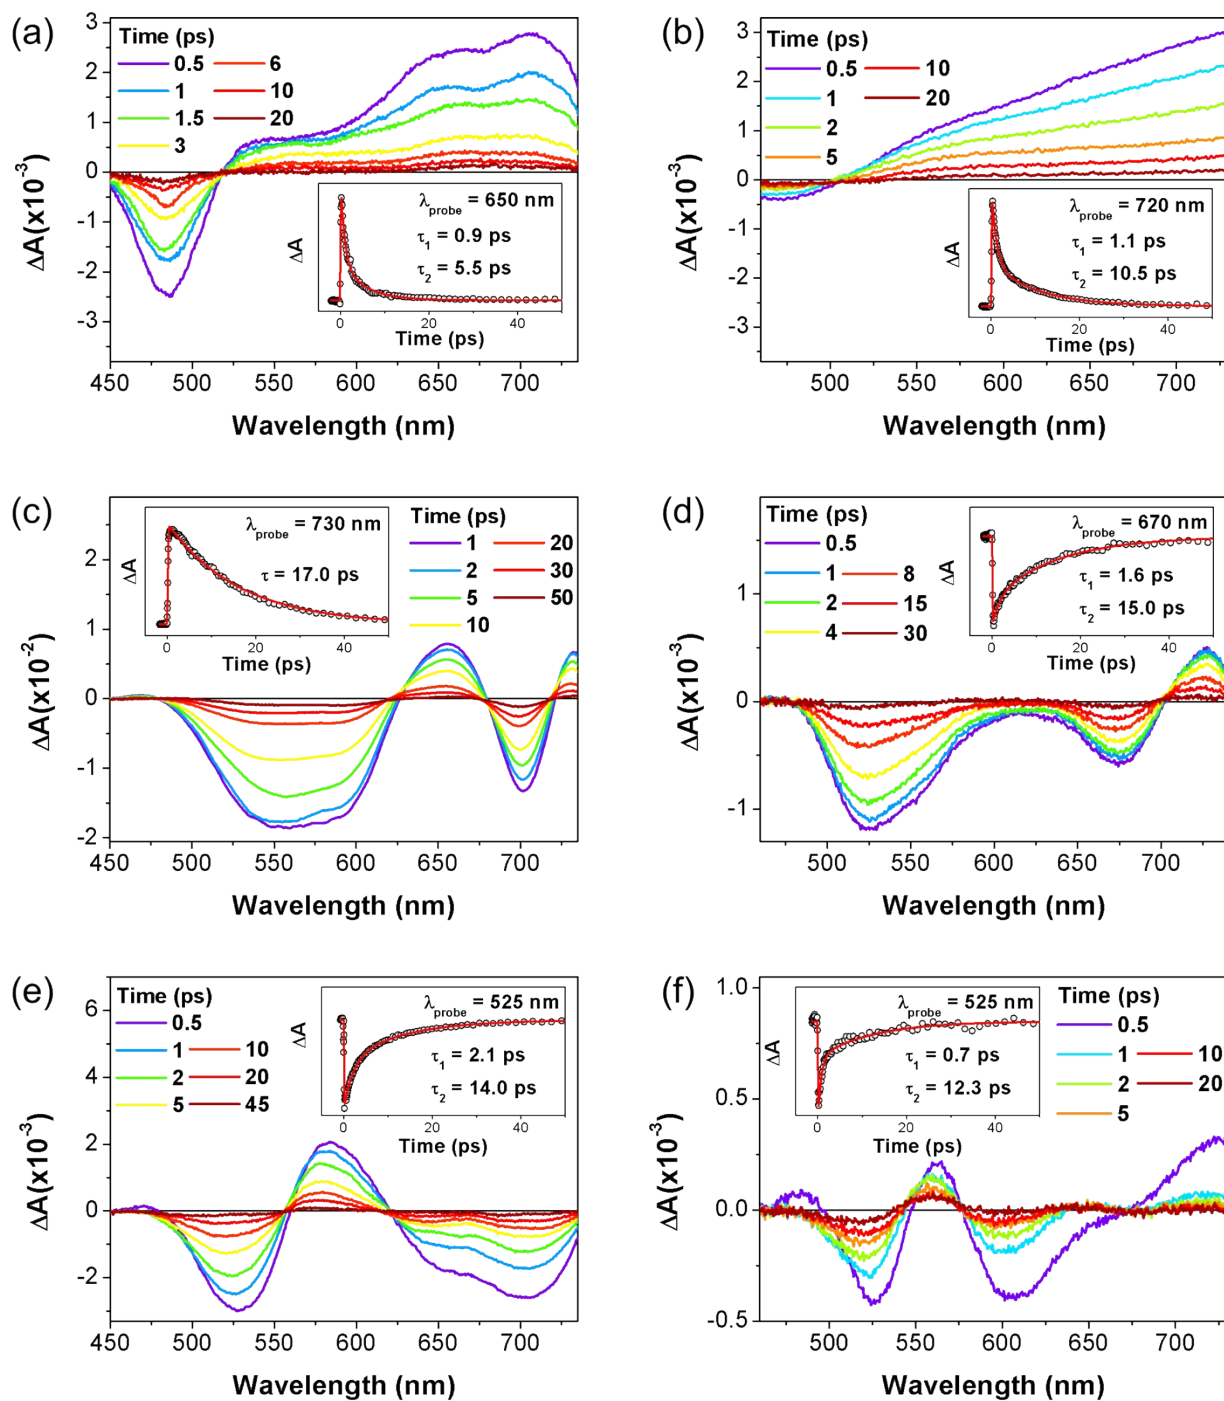

**Figure S25.** Femtosecond transient absorption spectra (left) and decay profiles (right) of (a) **5**, (b) **6**, (c) **5** with  $\text{NOSbF}_6$ , (d) **6** with  $\text{NOSbF}_6$ , (e) **5** with  $\text{CF}_3\text{COOH}$ , and (f) **6** with  $\text{CF}_3\text{COOH}$  in  $\text{CH}_2\text{Cl}_2$ .

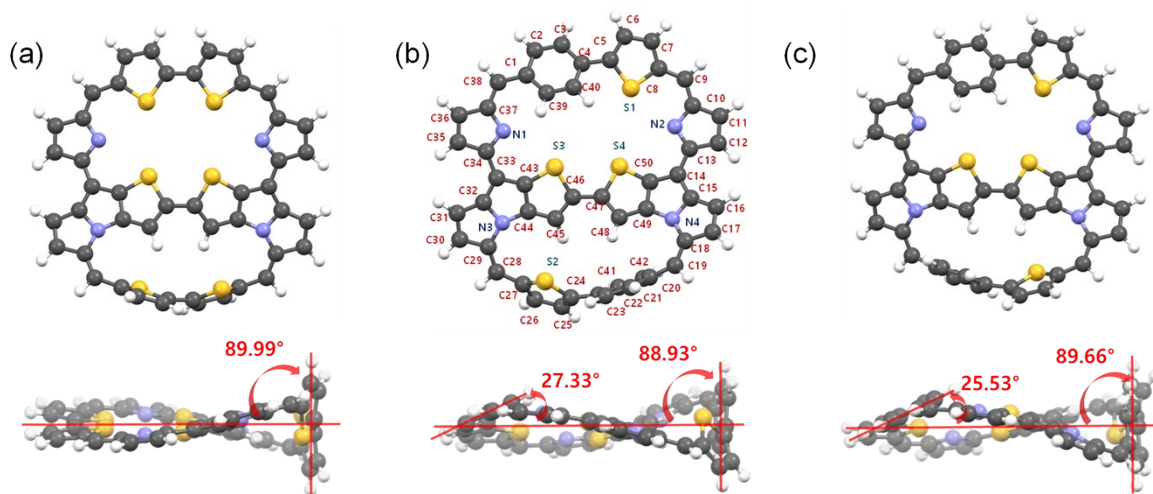

**Figure S26.** Optimized structures of (a) **5**, (b) **6**, and (c) **6'** calculated with B3LYP/6-311G(d,p).

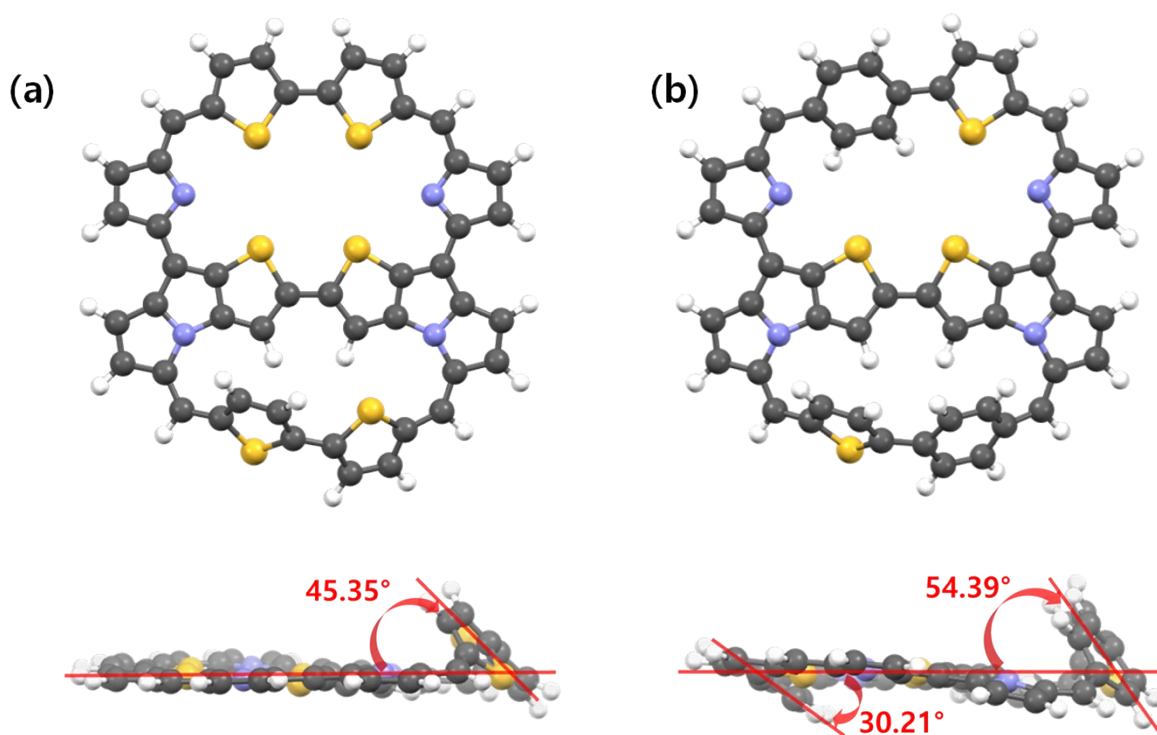

**Figure S27.** Optimized structures of (a)  $[5]^{2+}$  and (b)  $[6]^{2+}$  calculated with B3LYP/6-311G(d,p).

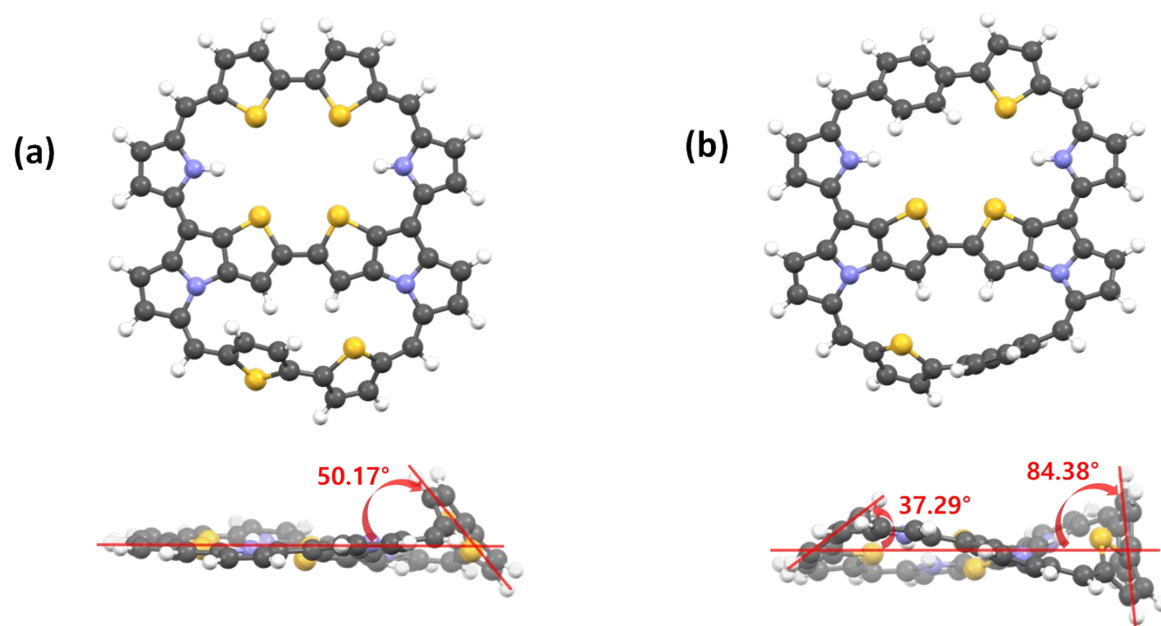

**Figure S28.** Optimized structures of (a)  $5\bullet 2H^+$  and (b)  $6\bullet 2H^+$  calculated with B3LYP/6-311G(d,p).

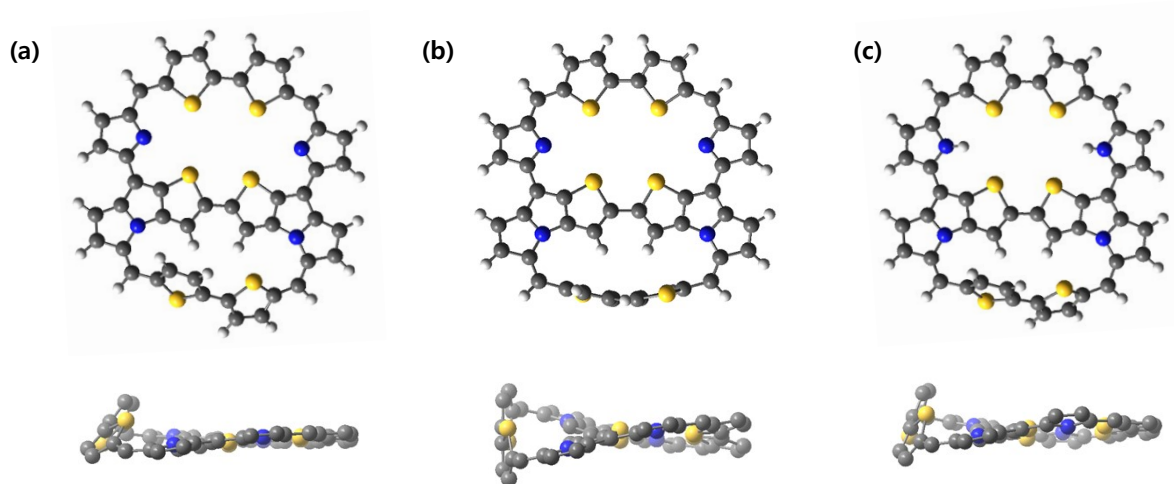

**Figures S29.** Optimized structures of (a)  $5^{2+}$ , (b)  $5$  and (c)  $5 \cdot 2H^+$  calculated with CAM-B3LYP/6-311G(d,p)

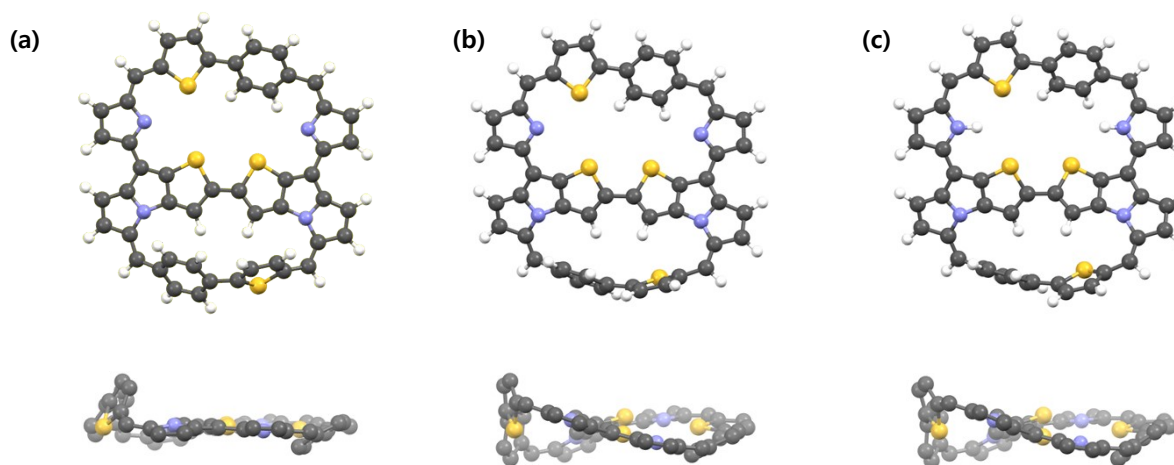

**Figures S30.** Optimized structures of (a)  $6^{2+}$ , (b)  $6$  and (c)  $6 \cdot 2H^+$  calculated using CAM-B3LYP/6-311G(d,p)

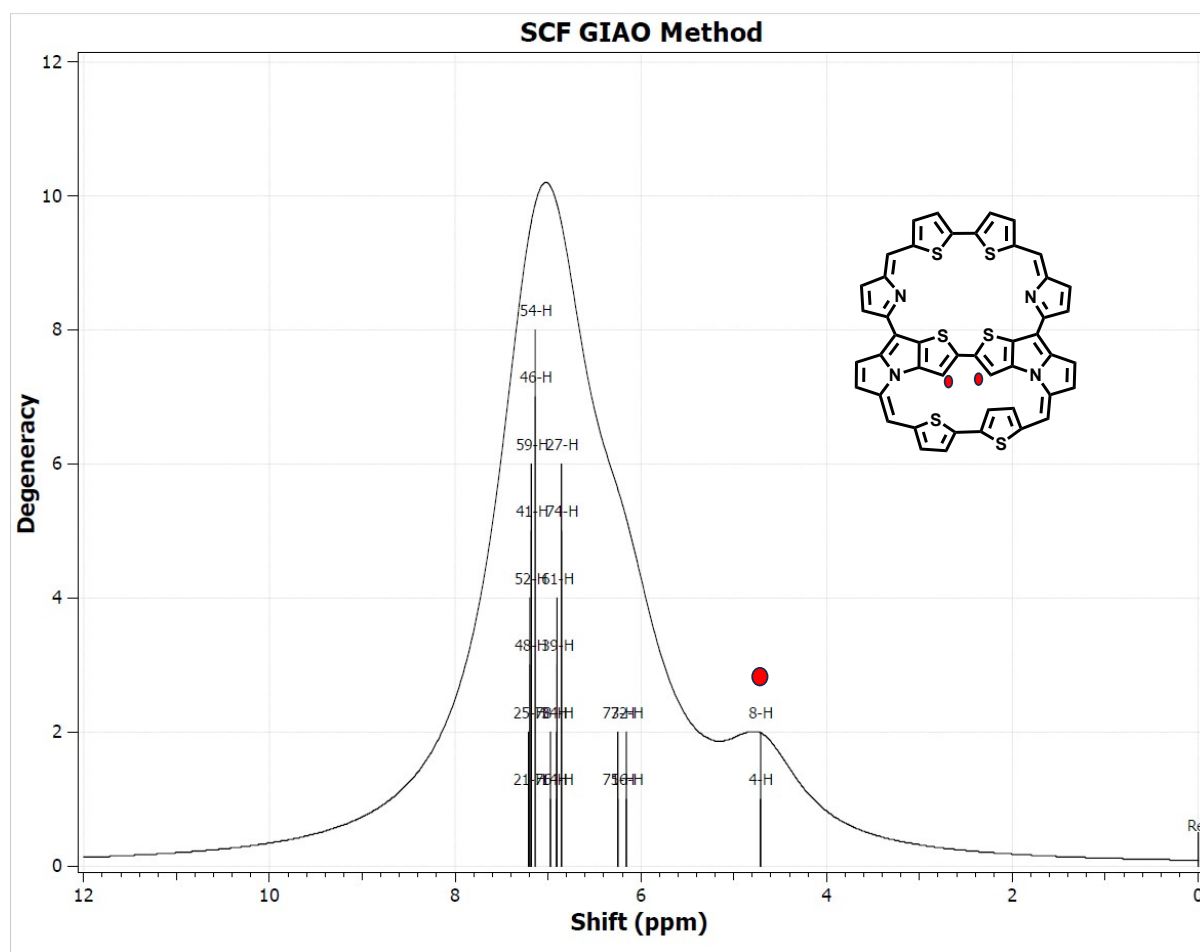

**Figure S31.** Calculated  $^1\text{H}$  NMR chemical shifts for compound **5** obtained using the GIAO method at CAM-B3LYP levels

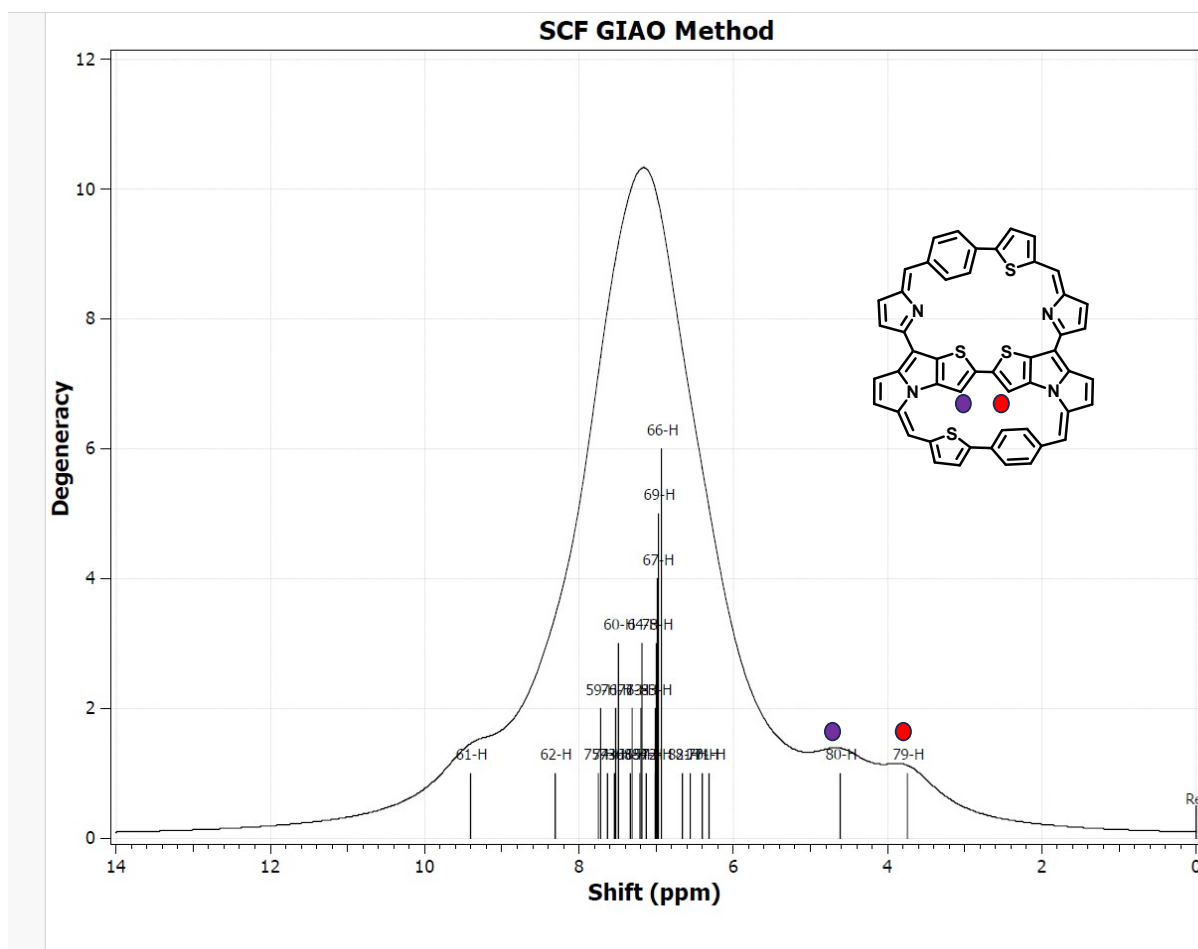

**Figure S32.** Calculated  $^1\text{H}$  NMR chemical shifts for compound **6** obtained using the GIAO method at CAM-B3LYP levels

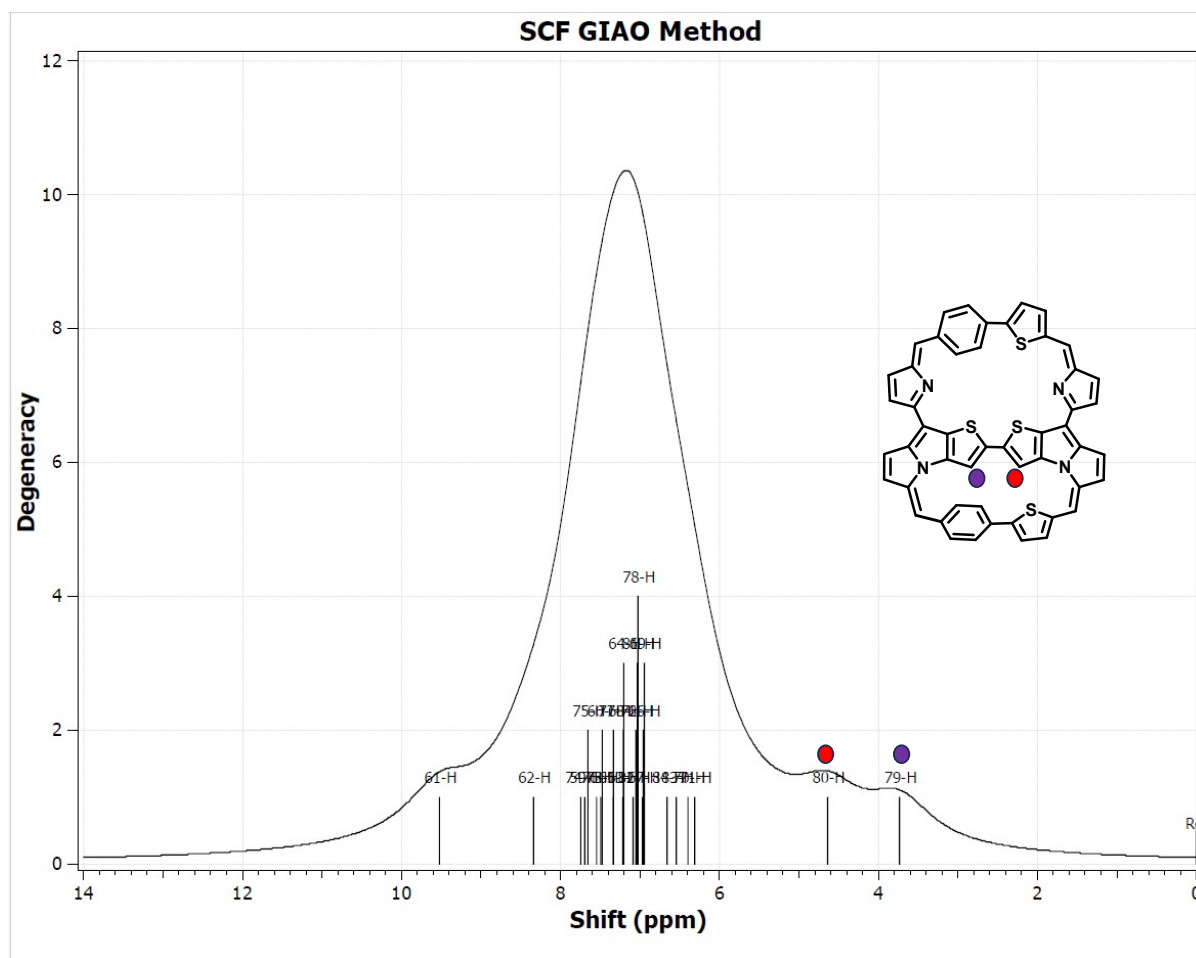

**Figure S33.** Calculated <sup>1</sup>H NMR chemical shifts for compound **6'** obtained using the GIAO method at CAM-B3LYP levels

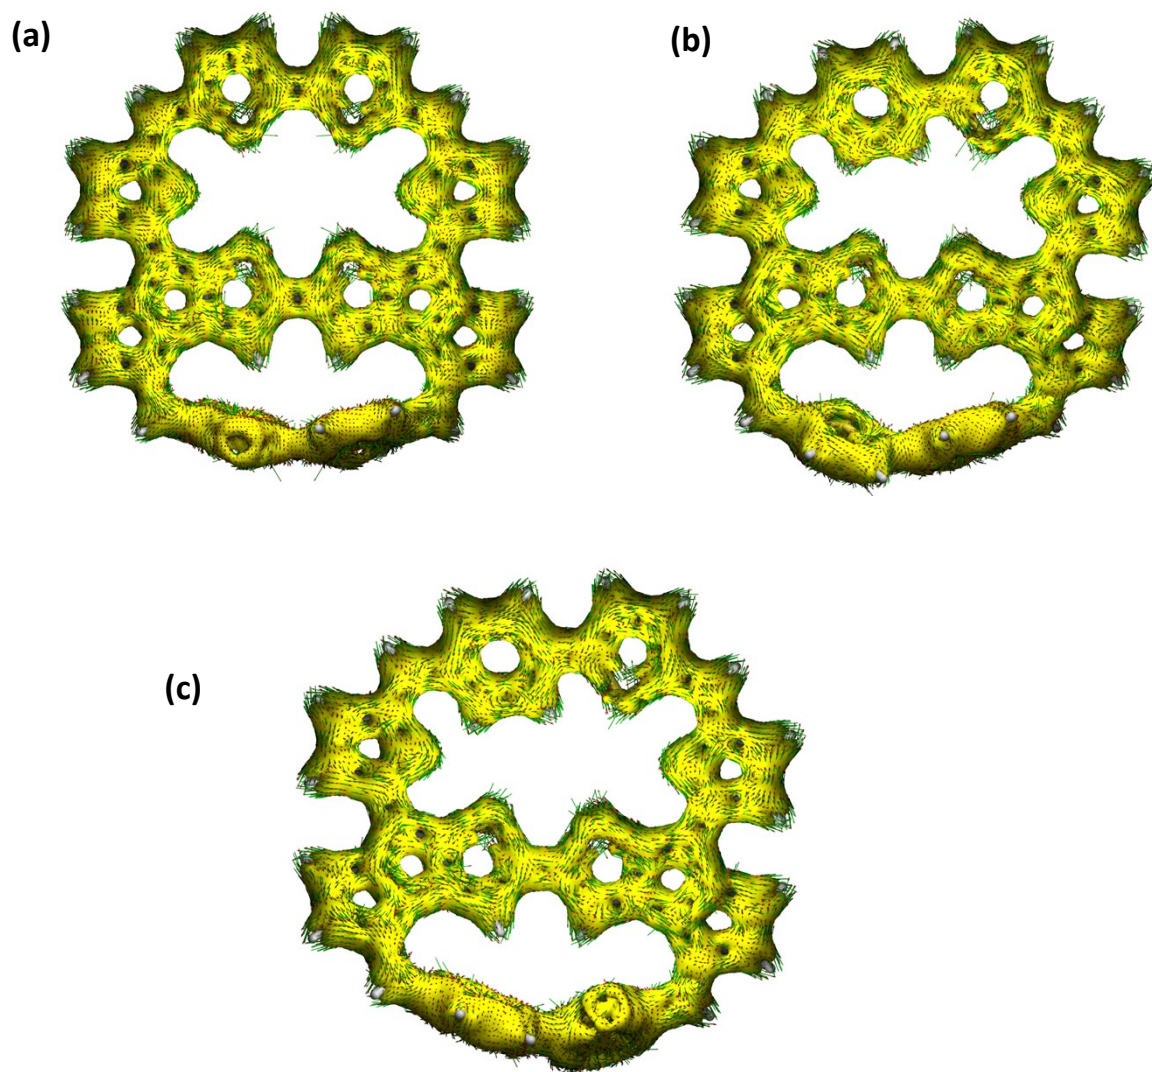

**Figure S34.** ACID plots for (a) **5**, (b) **6**, and (c) **6'** in  $S_0$  state at isovalue of 0.04 calculated with B3LYP/6-311G(d,p) level of Theory. For clarity, mesityl substituents are omitted in the ACID calculations.

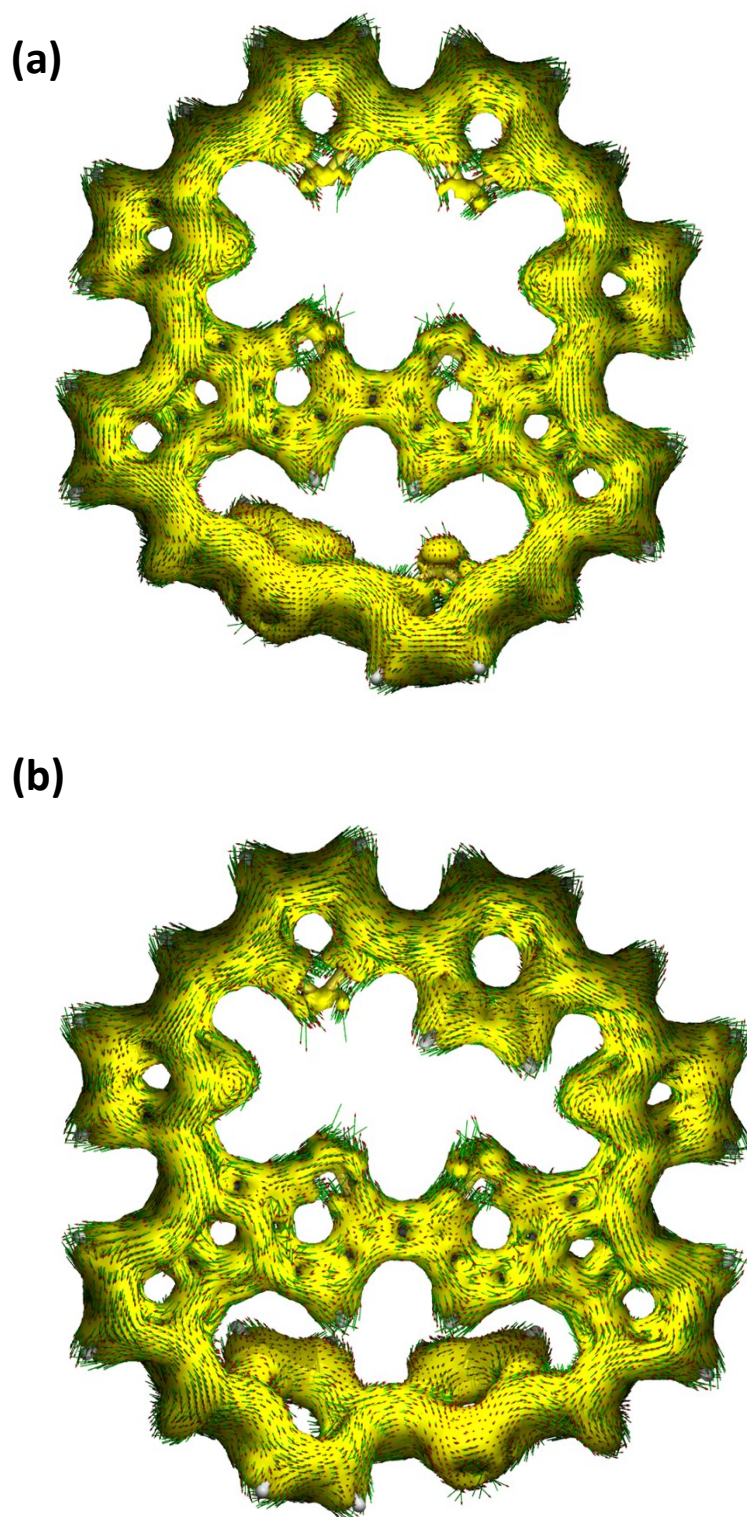

**Figure S35.** ACID plots for (a)  $[5]^{2+}$  and  $[6]^{2+}$  in  $S_0$  state at isovalue of 0.04 calculated with B3LYP/6-311G(d,p) level of Theory.

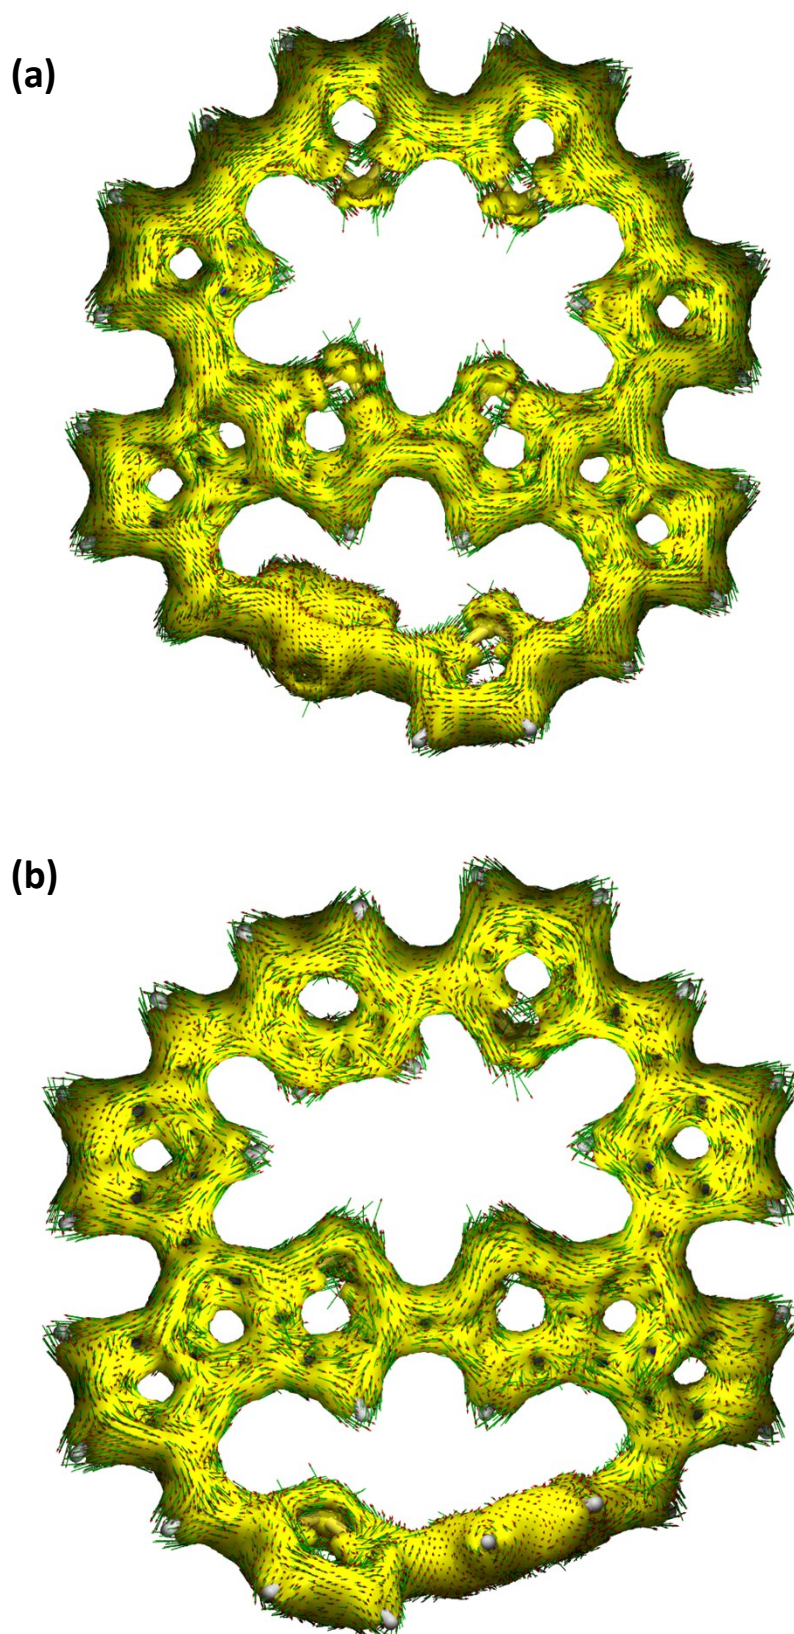

**Figure S36.** ACID plots for (a)  $5 \cdot 2H^+$  in  $T_1$  state and (b)  $6 \cdot 2H^+$  in  $S_0$  state at isovalue of 0.04 calculated with B3LYP/6-311G(d,p) level of Theory.

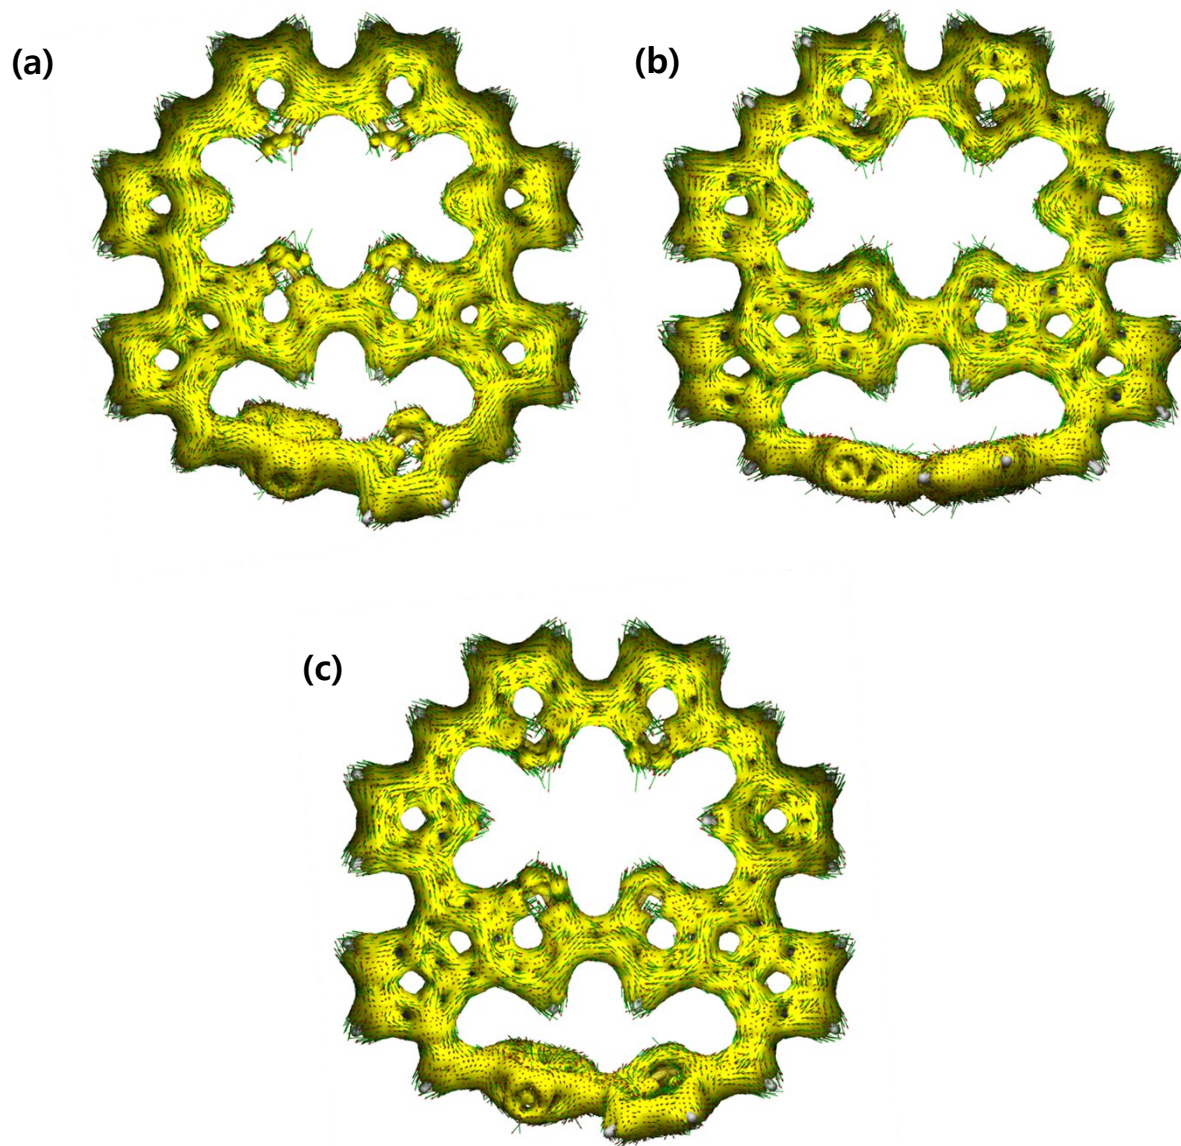

**Figure S37.** ACID plots for (a)  $5^{2+}$ , (b)  $5$  in  $S_0$  state and (c)  $5 \cdot 2H^+$  in  $T_1$  state at isovalue of 0.04 calculated with CAM-B3LYP/6-311G(d,p) level of Theory.

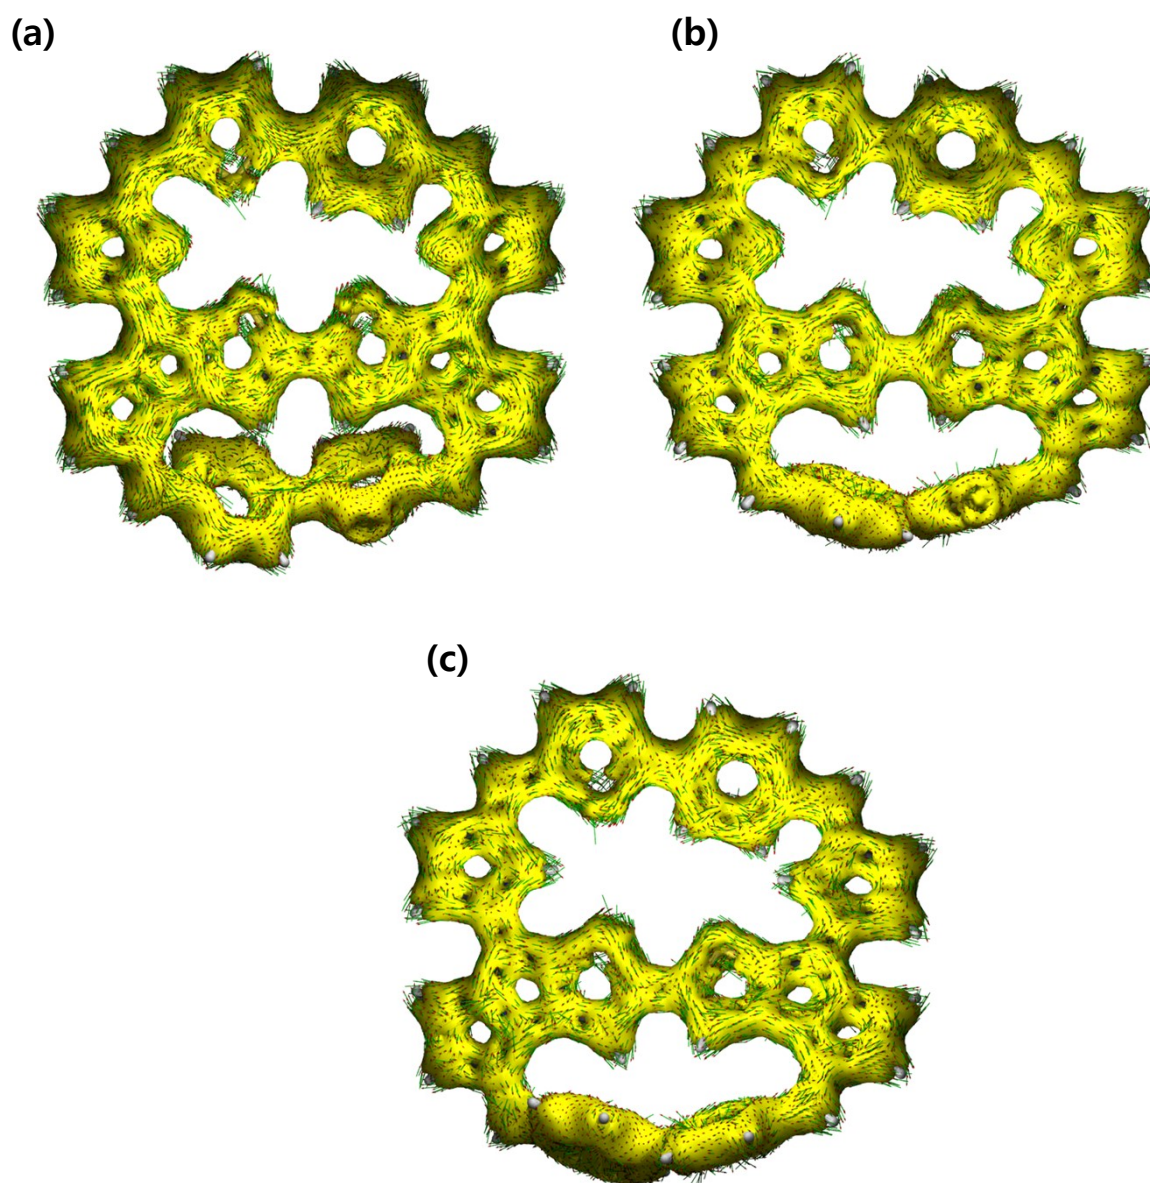

**Figure S38.** ACID plots for (a)  $6^{2+}$ , (b) **6** in  $S_0$  state and (c)  $6 \cdot 2H^+$  at isovalue of 0.04 calculated with CAM-B3LYP/6-311G(d,p) level of Theory.

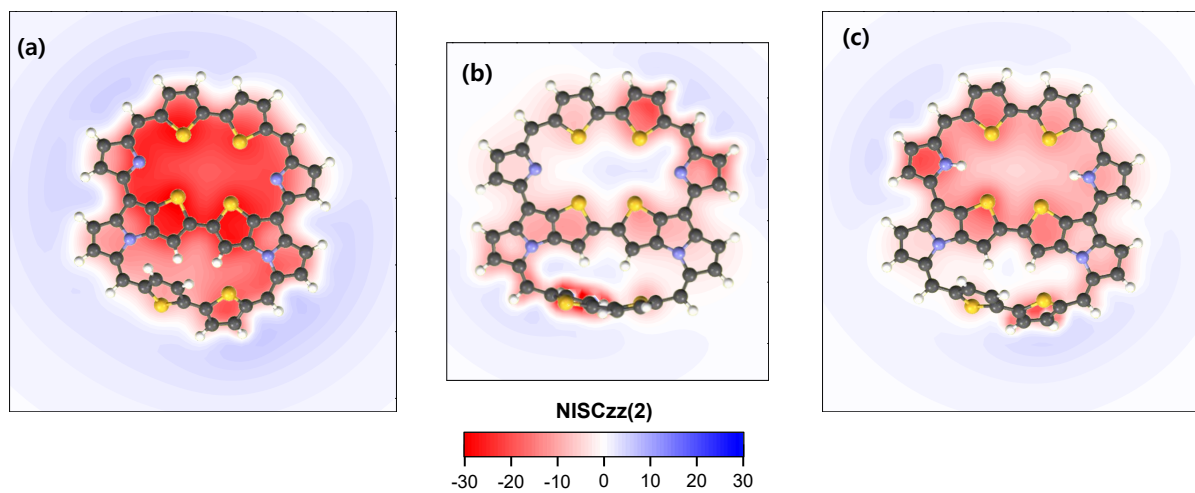

**Figure S39.** NICS<sub>zz</sub>(2) scans of octaphyrins (a)  $5^{2+}$  ( $S_0$ ), (b) **5** ( $S_0$ ) and (c)  $5 \cdot 2H^+$  ( $T_1$ ) calculated with CAM-B3LYP/6-311G(d,p) level of Theory.

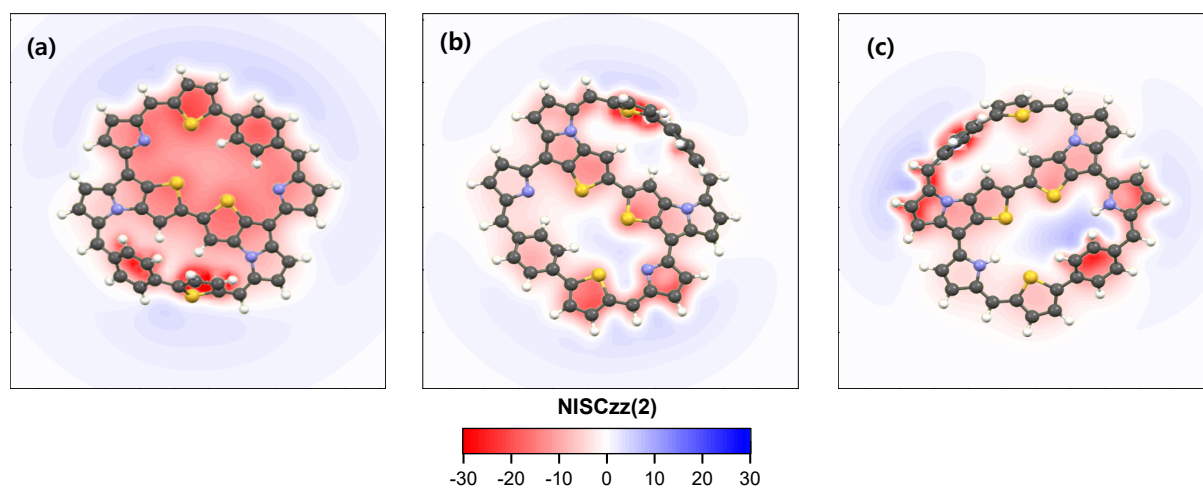

**Figure S40.** NICS<sub>zz</sub>(2) scans of octaphyrins (a)  $6^{2+}$  ( $S_0$ ), (b) **6** ( $S_0$ ) and (c)  $6 \cdot 2H^+$  ( $S_0$ ) calculated with CAM-B3LYP/6-311G(d,p) level of Theory.

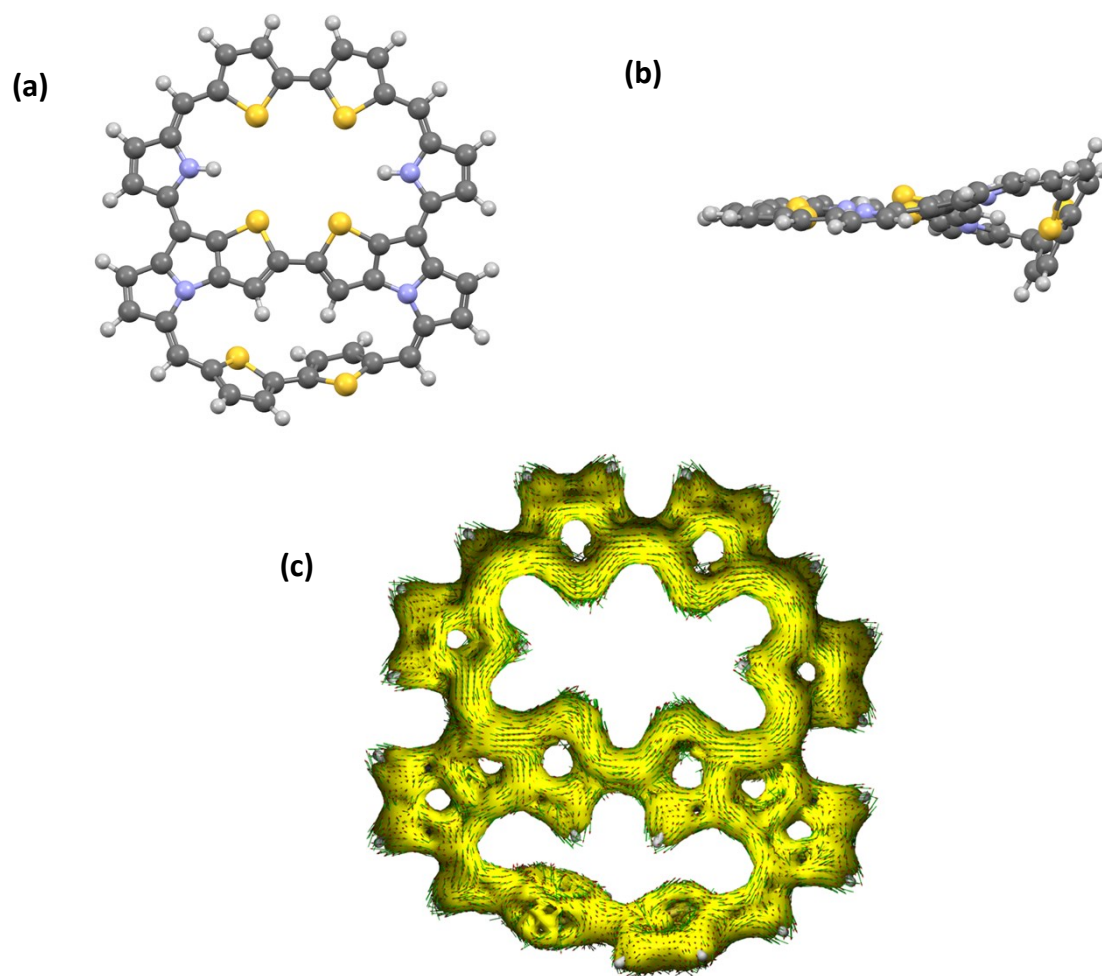

**Figure S41.** Optimized structure of singlet state ( $S_0$ ) of  $5\bullet 2H^+$  (a) front view, (b) side view and (c) AICD plot calculated with CAM-B3LYP/6-311G(d,p)

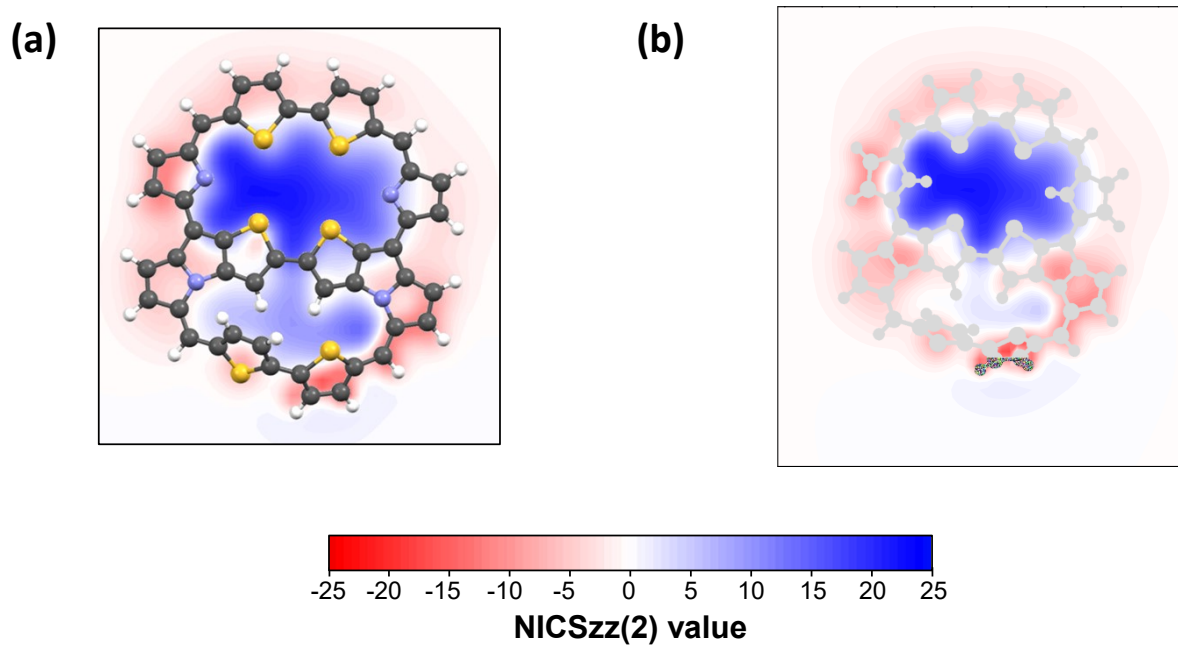

**Figure S42.** NICS<sub>zz</sub> Scan for 5•2H<sup>+</sup> in S<sub>0</sub> state with (a) B3LYP/6-311G(d,p) and (b) CAM-B3LYP/6-311G(d,p) level of Theory.

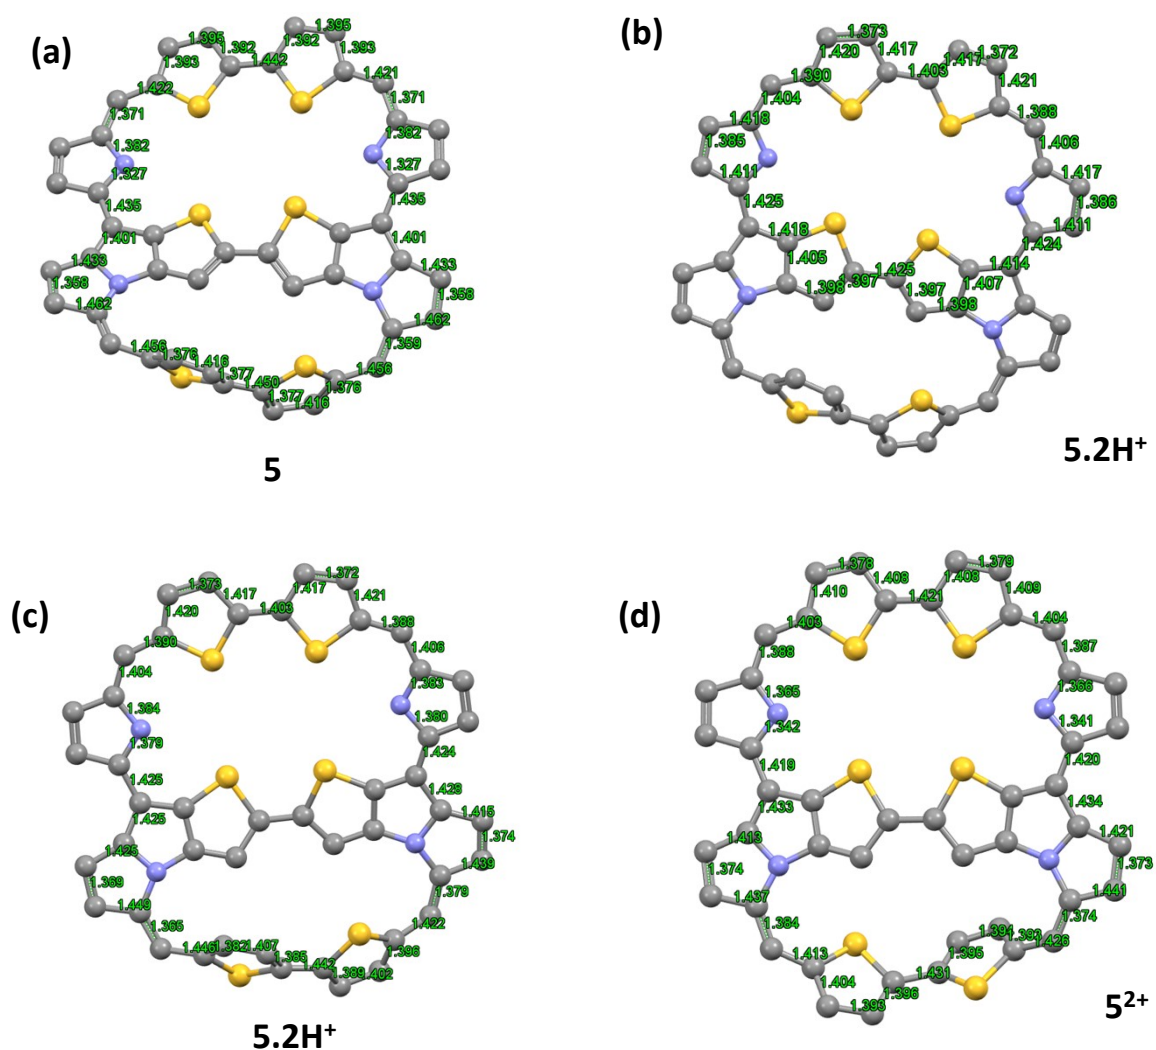

| Compound                       | R <sub>avg</sub> | EN    | GEO   | HOMA | BLA   |
|--------------------------------|------------------|-------|-------|------|-------|
| 5                              | 1.404            | 0.066 | 0.289 | 0.64 | 0.065 |
| 5.2H <sup>+</sup> (upper ring) | 1.399            | 0.031 | 0.146 | 0.82 | 0.026 |
| 5.2H <sup>+</sup> (full ring)  | 1.401            | 0.043 | 0.149 | 0.81 | 0.042 |
| 5 <sup>2+</sup>                | 1.401            | 0.044 | 0.159 | 0.80 | 0.041 |

**Figure S43.** HOMA values of (a) [36] $\pi$ -electron conjugation pathway for **5**. (b) [28] $\pi$ - and (c) [36] $\pi$ -electron conjugation pathways for **5•2H<sup>+</sup>**. (d) [34] $\pi$ -electron conjugation pathways for **[5]<sup>2+</sup>**.

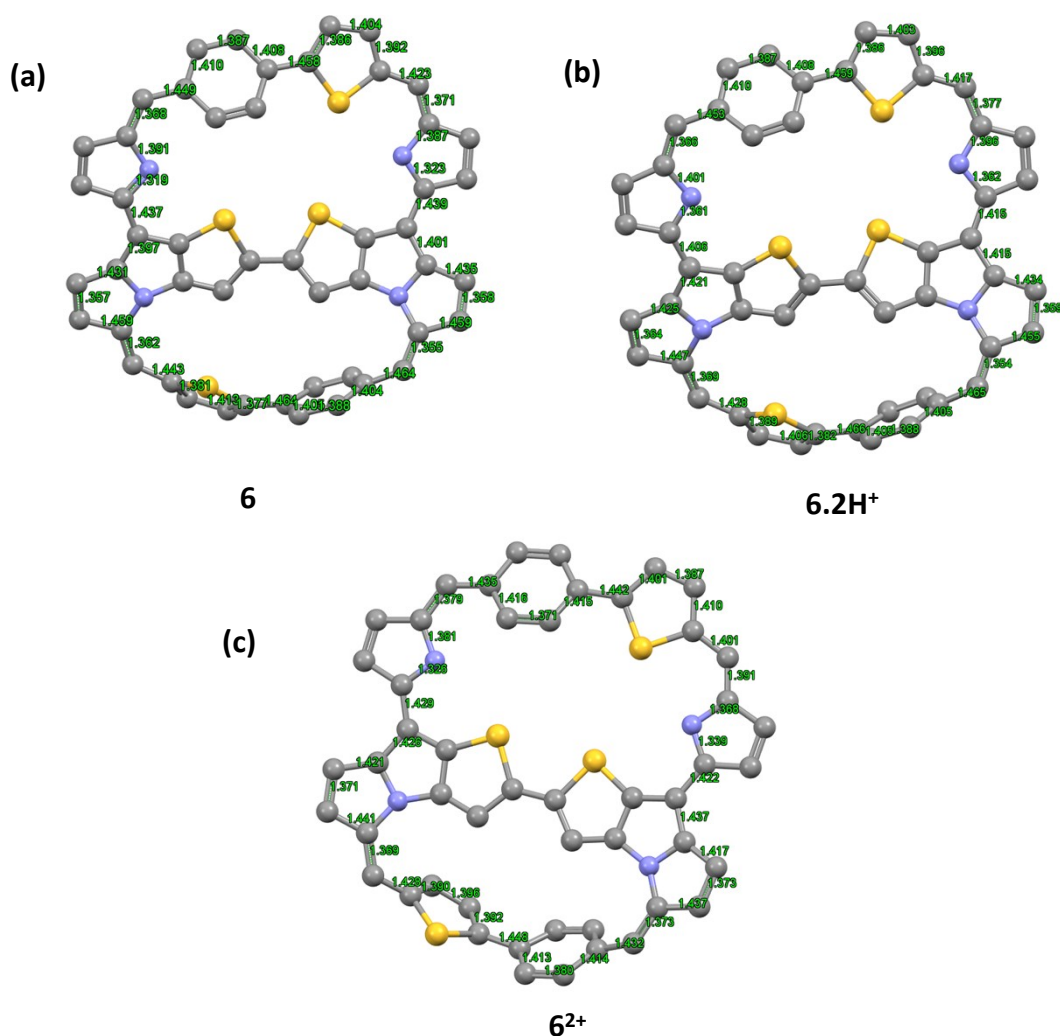

| Compound                | $R_{\text{avg}}$ | EN    | GEO   | HOMA | BLA   |
|-------------------------|------------------|-------|-------|------|-------|
| <b>6</b>                | 1.401            | 0.044 | 0.320 | 0.63 | 0.064 |
| <b>6.2H<sup>+</sup></b> | 1.401            | 0.044 | 0.325 | 0.63 | 0.056 |
| <b>6<sup>2+</sup></b>   | 1.400            | 0.037 | 0.272 | 0.69 | 0.052 |

**Figure S44.** HOMA values for [36] $\pi$ -electron conjugation pathways for (a) **6**, (b) **6•2H<sup>+</sup>** and (c) **[6]<sup>2+</sup>**. The  $\alpha$  and  $R_{\text{opt}}$ (Å) values were taken as 257.7 Å<sup>-2</sup> and 1.397, 1.334 respectively for C-C and C-N. *Meso*-substituents and protons are omitted for clarity.

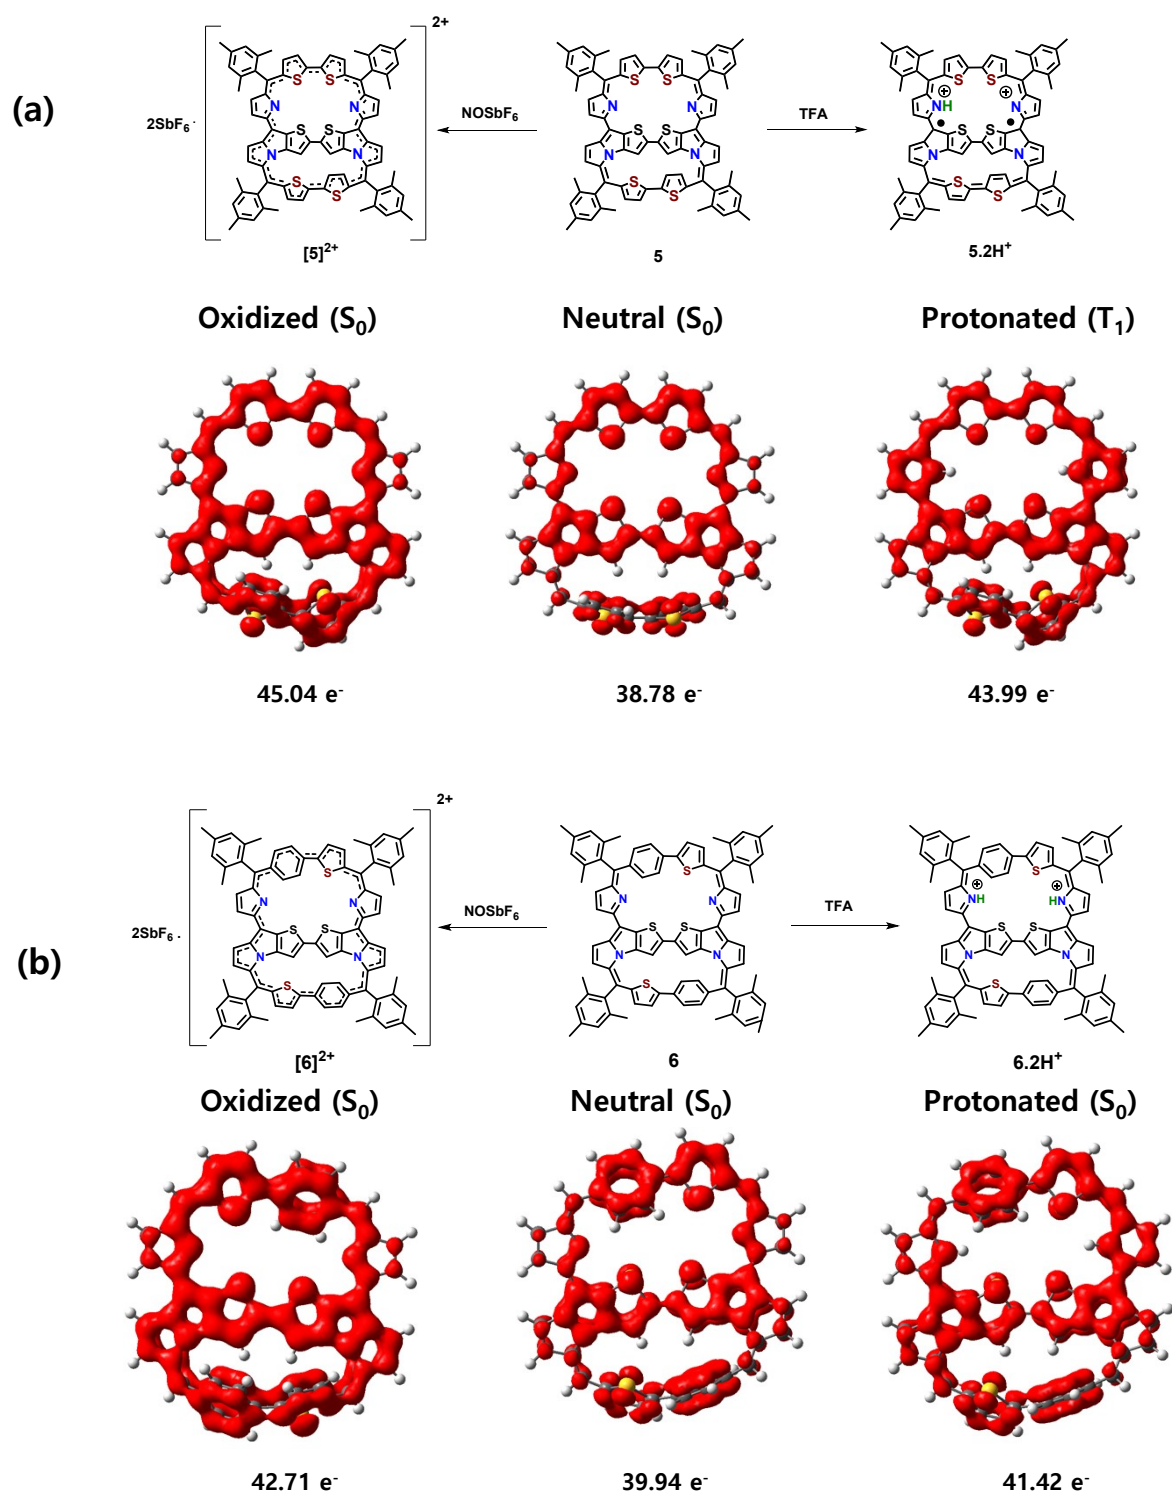

**Figure S45.** Electron density of delocalized bonds (EDDB) analysis of (a) **5** in neutral, two-electron oxidized, and diprotonated states, where **5•2H<sup>+</sup>** was calculated in the T<sub>1</sub> state, and (b) **6** in its neutral, two-electron oxidized, and diprotonated states. The values indicate quantitative delocalized electron density.

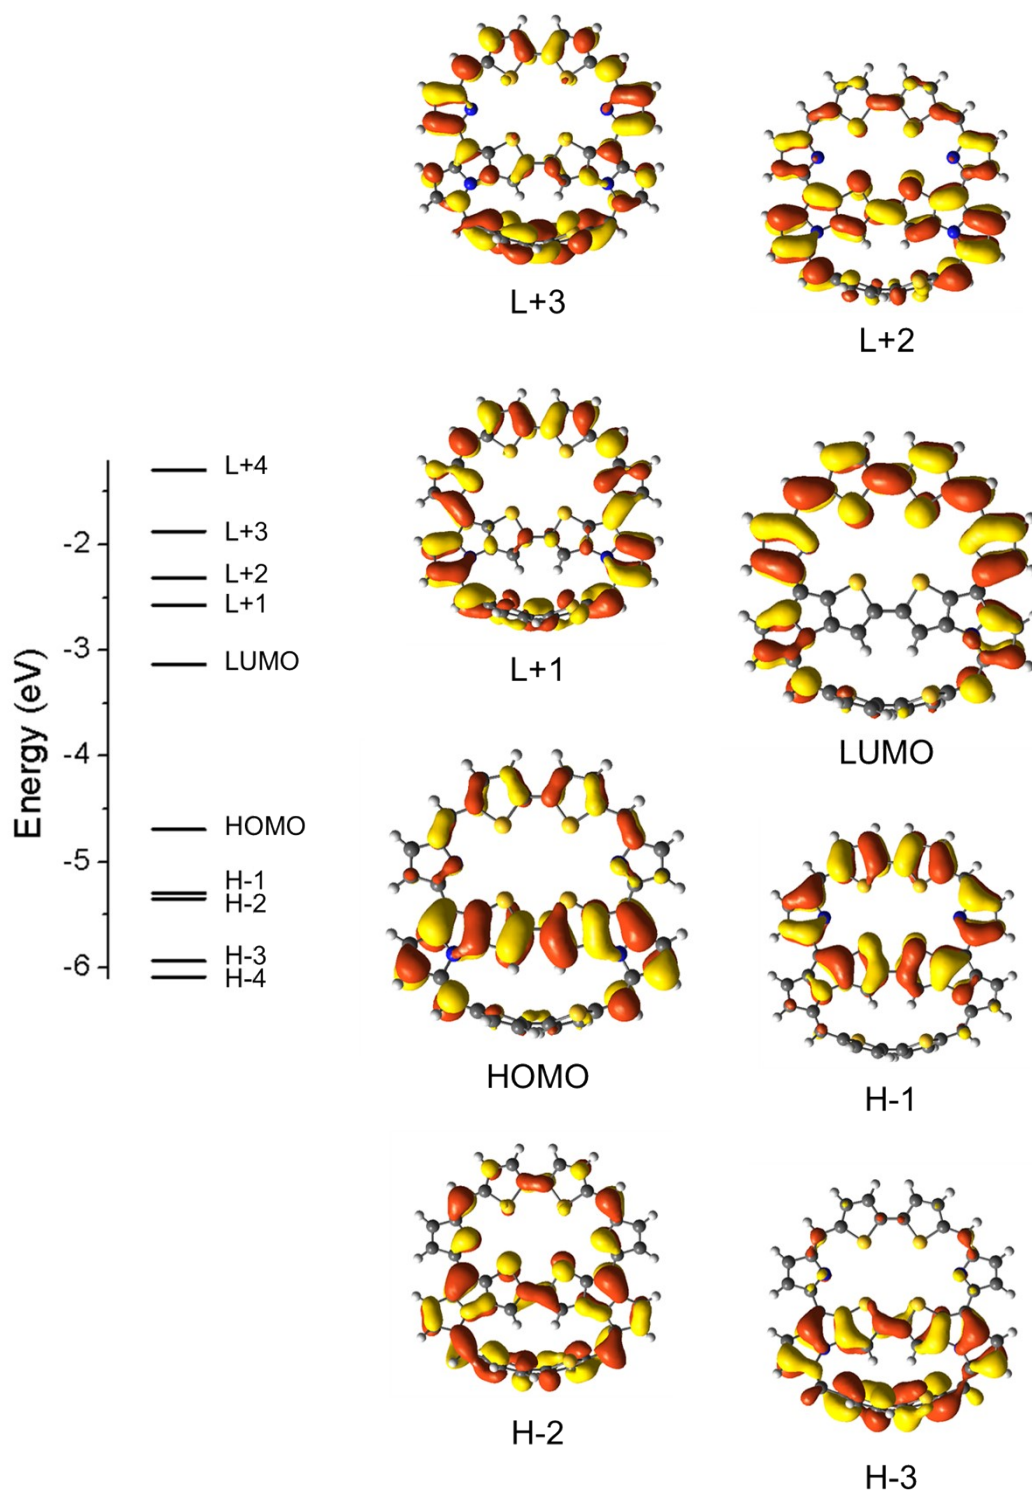

Figure S46. Frontier MO diagram of **5** in its neutral  $S_0$  state.

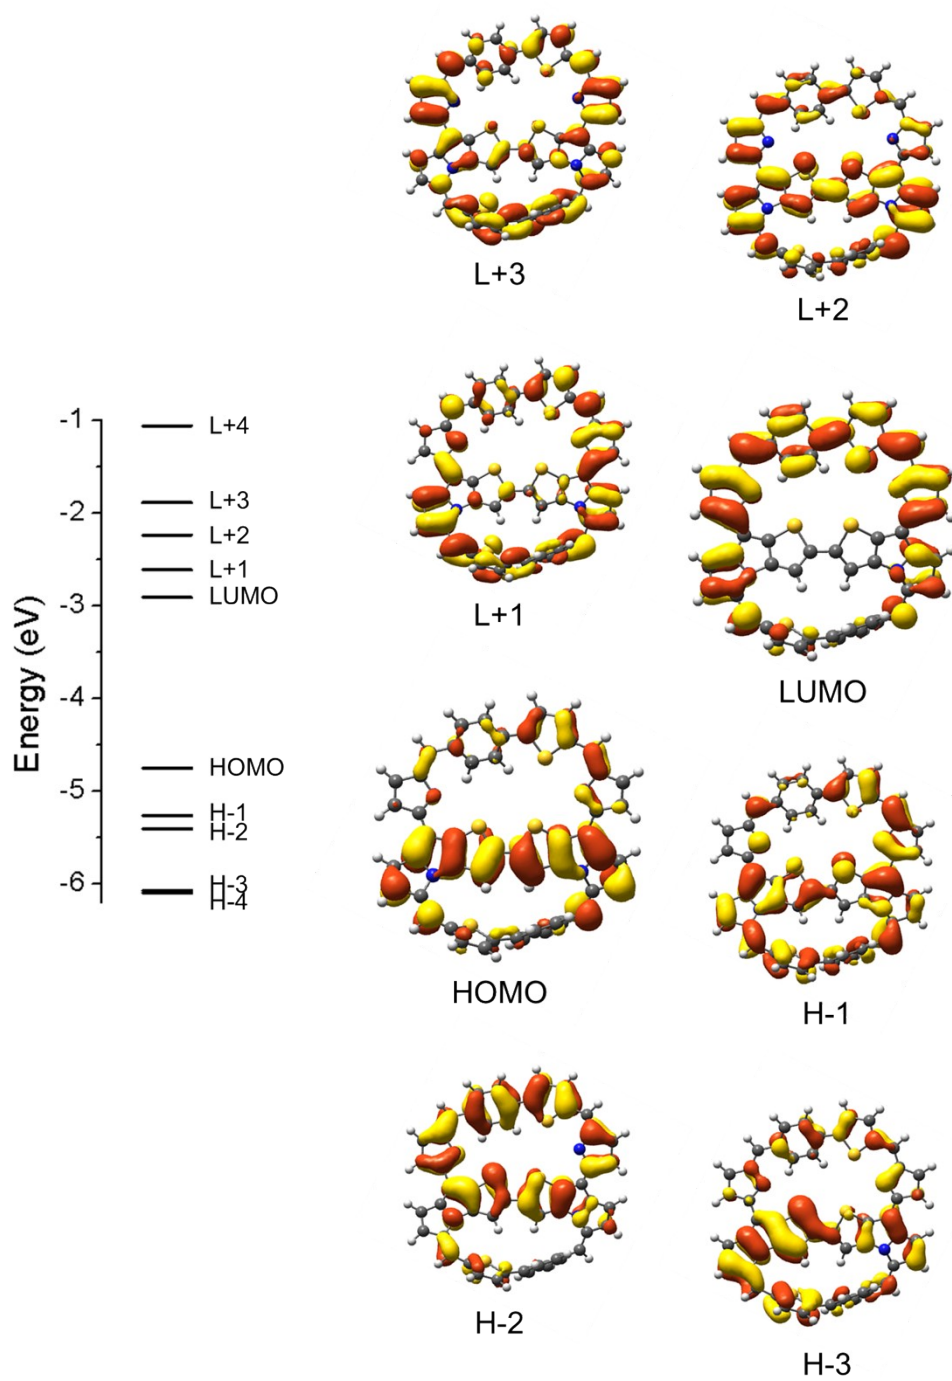

**Figure S47.** Frontier MO diagram of **6** in its neutral  $S_0$  state.

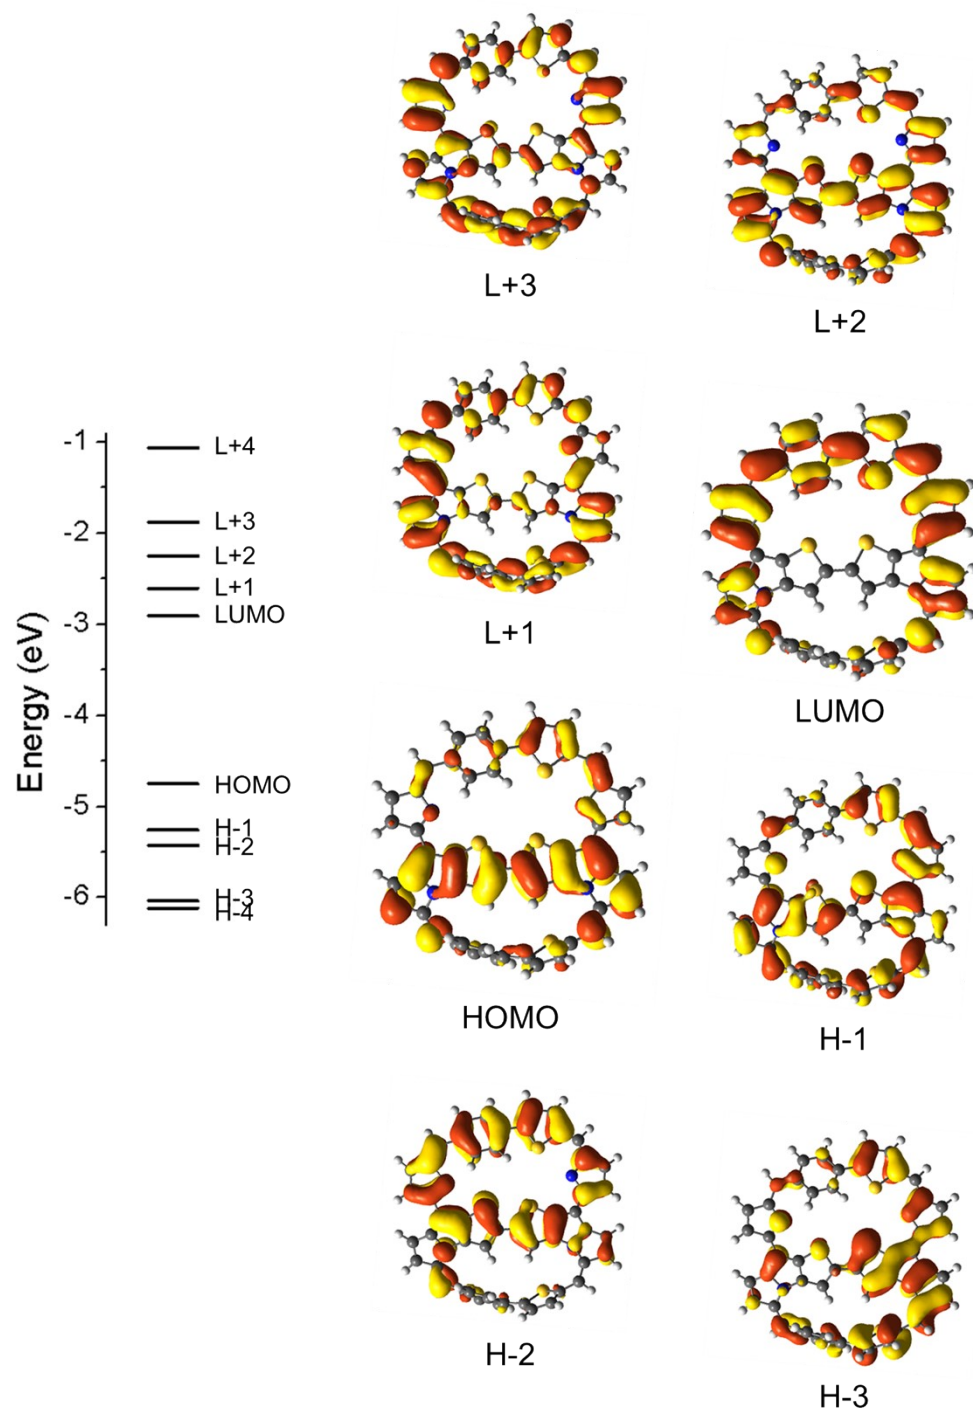

**Figure S48.** Frontier MO diagram of neutral **6'** in its neutral  $S_0$  state.

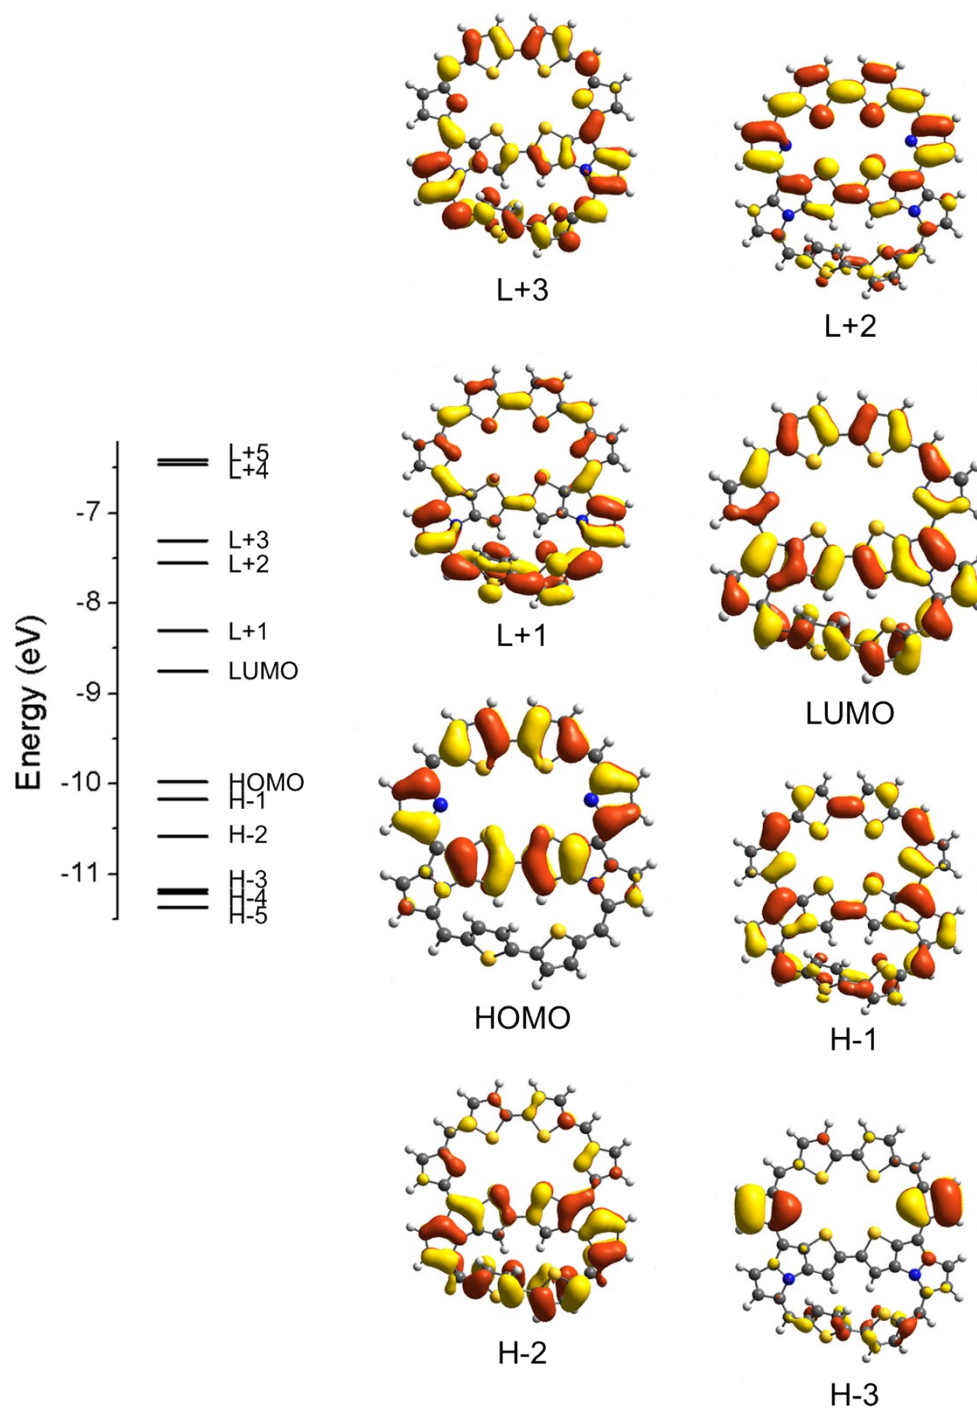

**Figure S49.** Frontier MO diagram of  $[5]^{2+}$  in its  $S_0$  state.

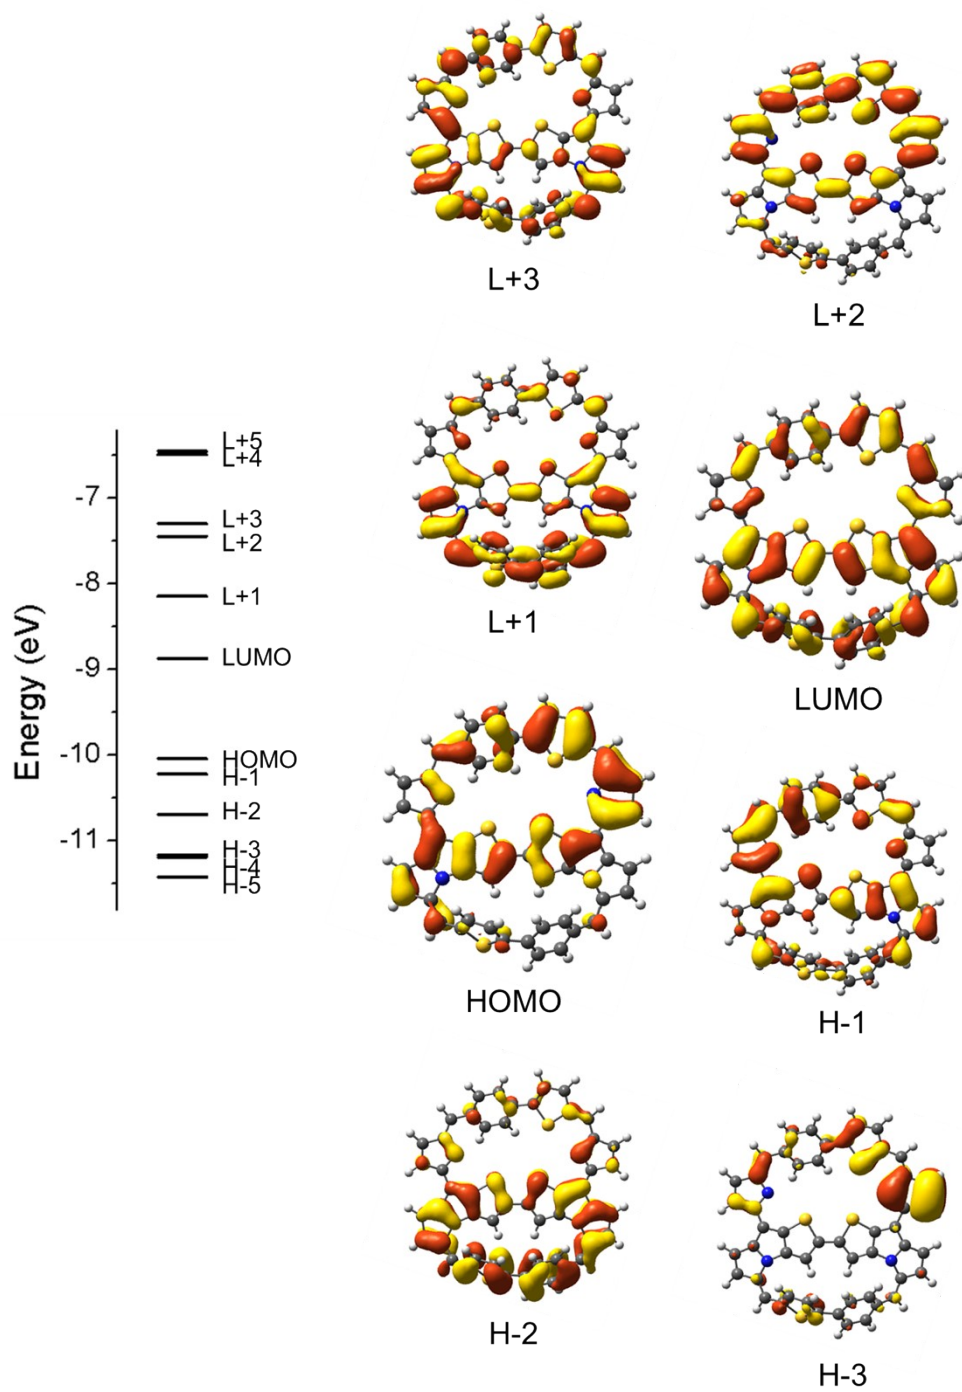

**Figure S50.** Frontier MO diagram of  $[6]^{2+}$  in its  $S_0$  state.

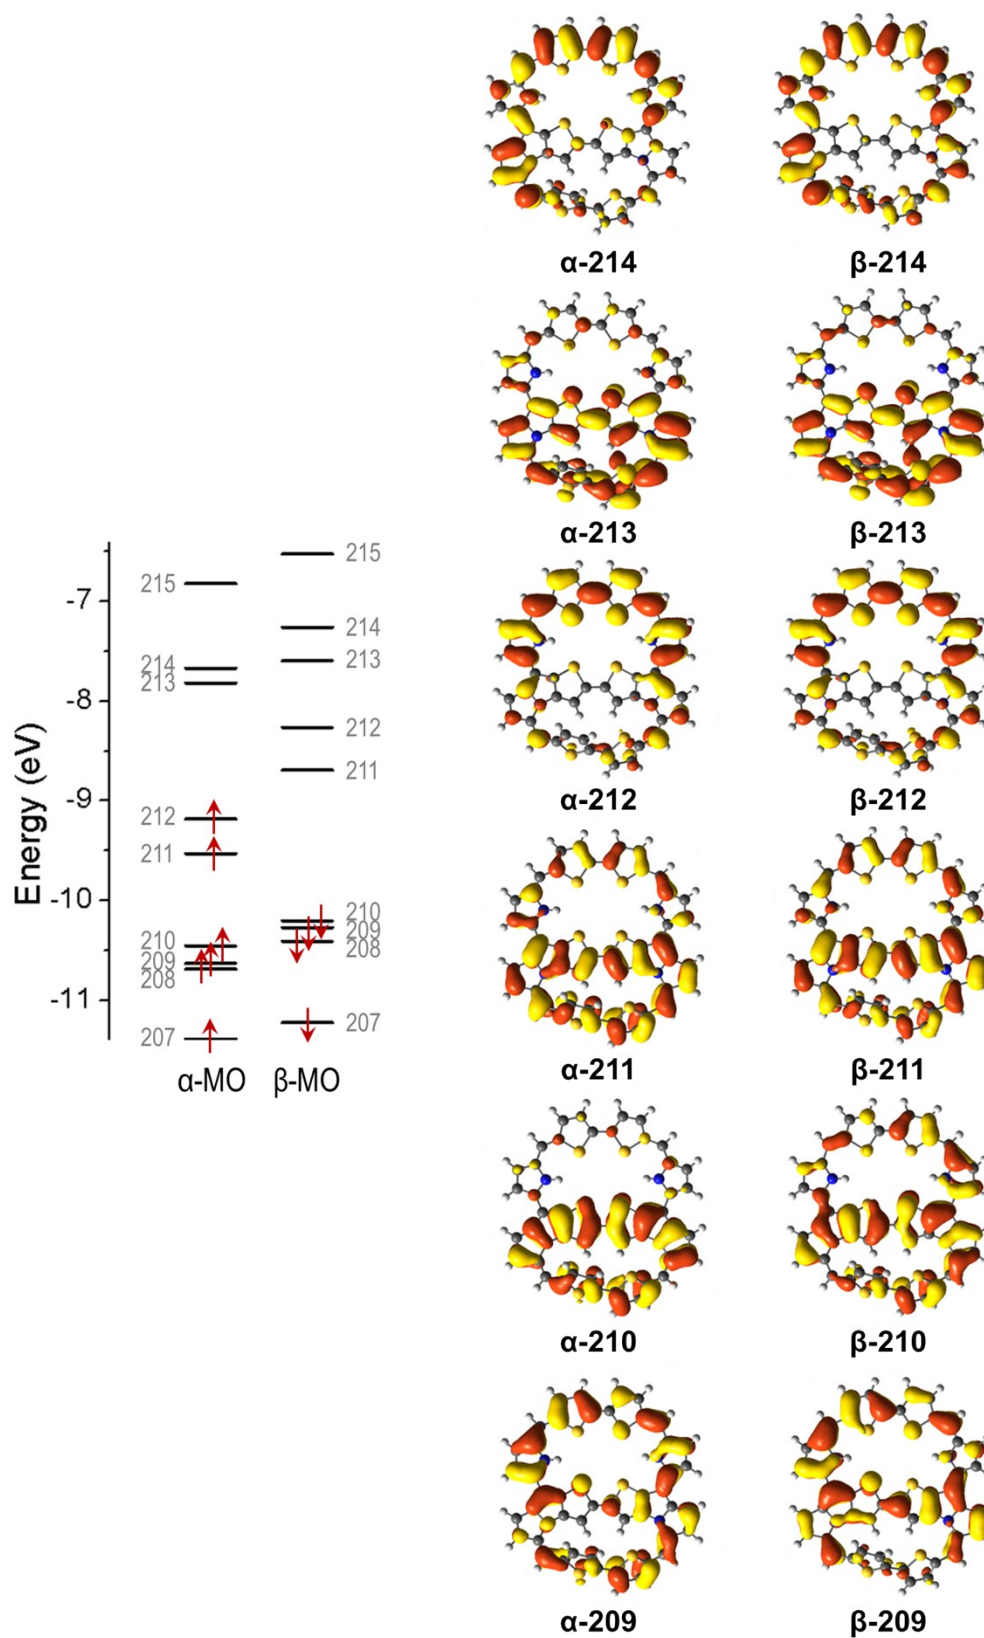

Figure S51. Frontier MO diagram of  $5\cdot 2H^+$  in its  $T_1$  state.

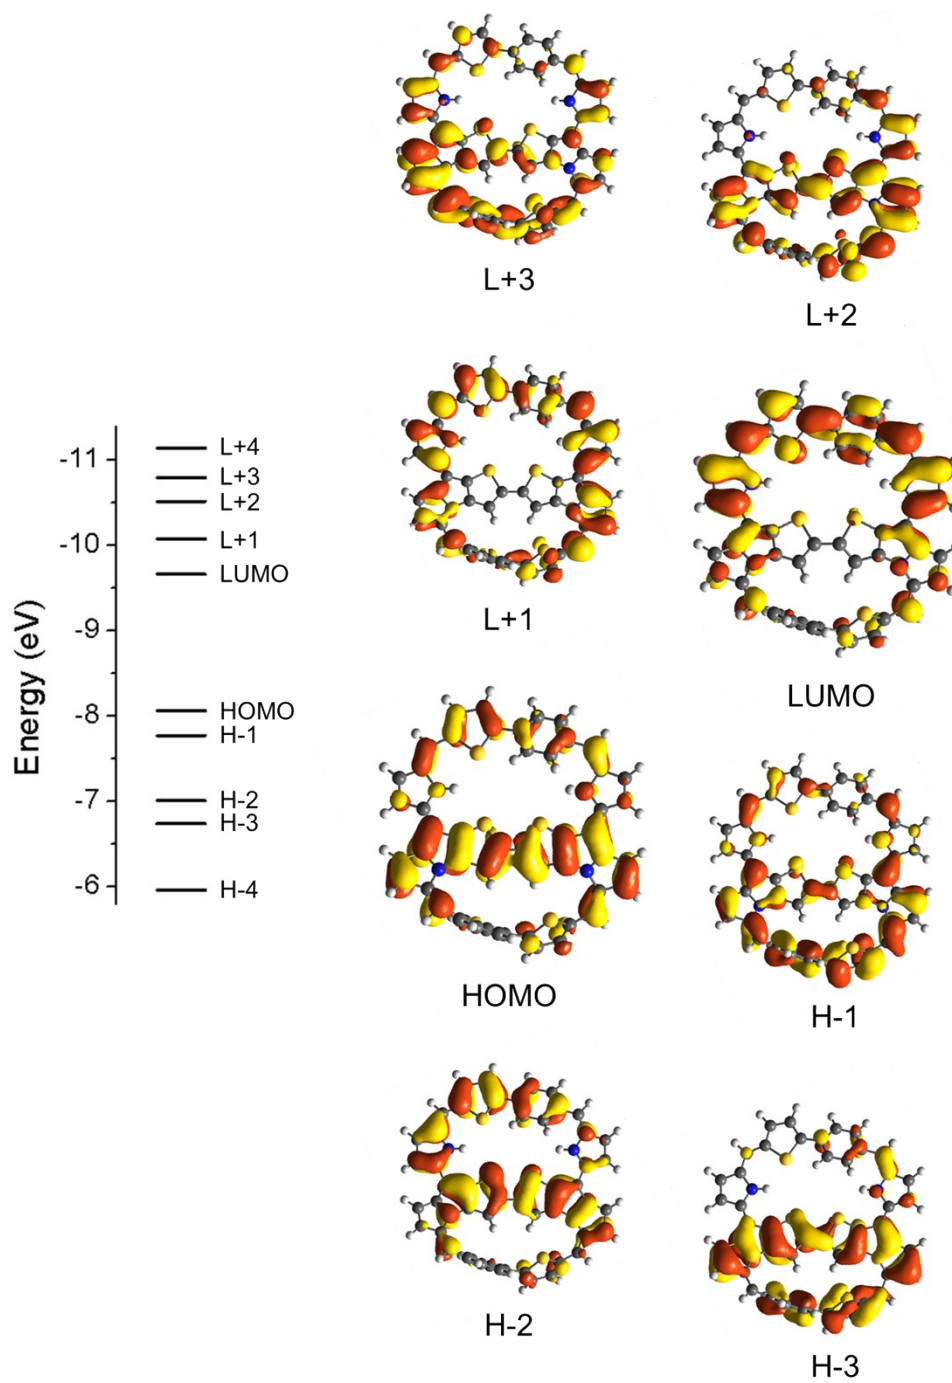

**Figure S52.** Frontier MO diagram of  $6\bullet 2H^+$  in its  $S_0$  state.

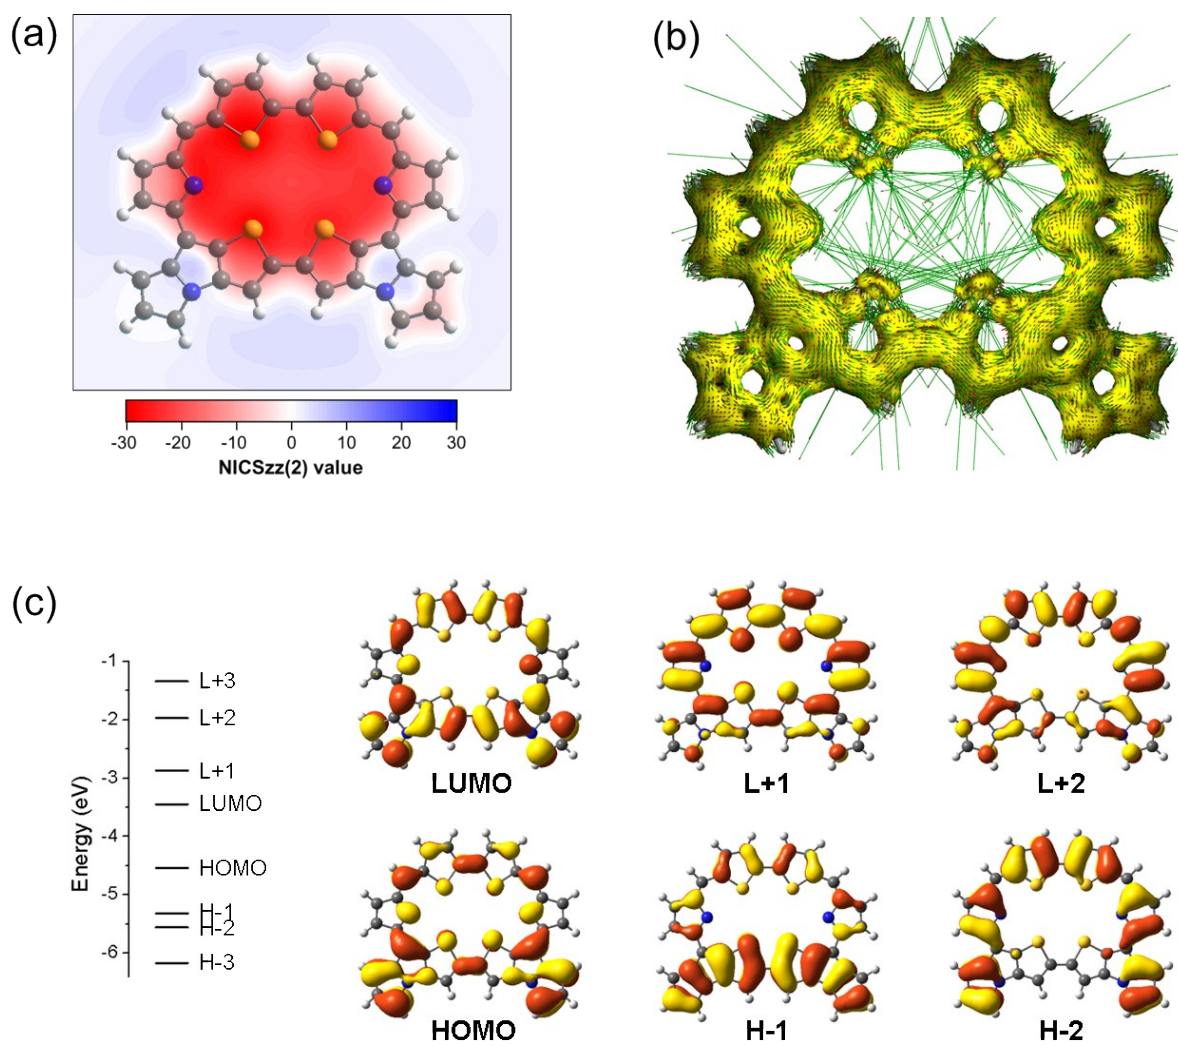

**Figure S53.** (a)  $\text{NICS}_{zz}(2)$  map, (b) ACID plot, and (c) MO diagram of the isolated upper sub-macrocycle present in **5**.

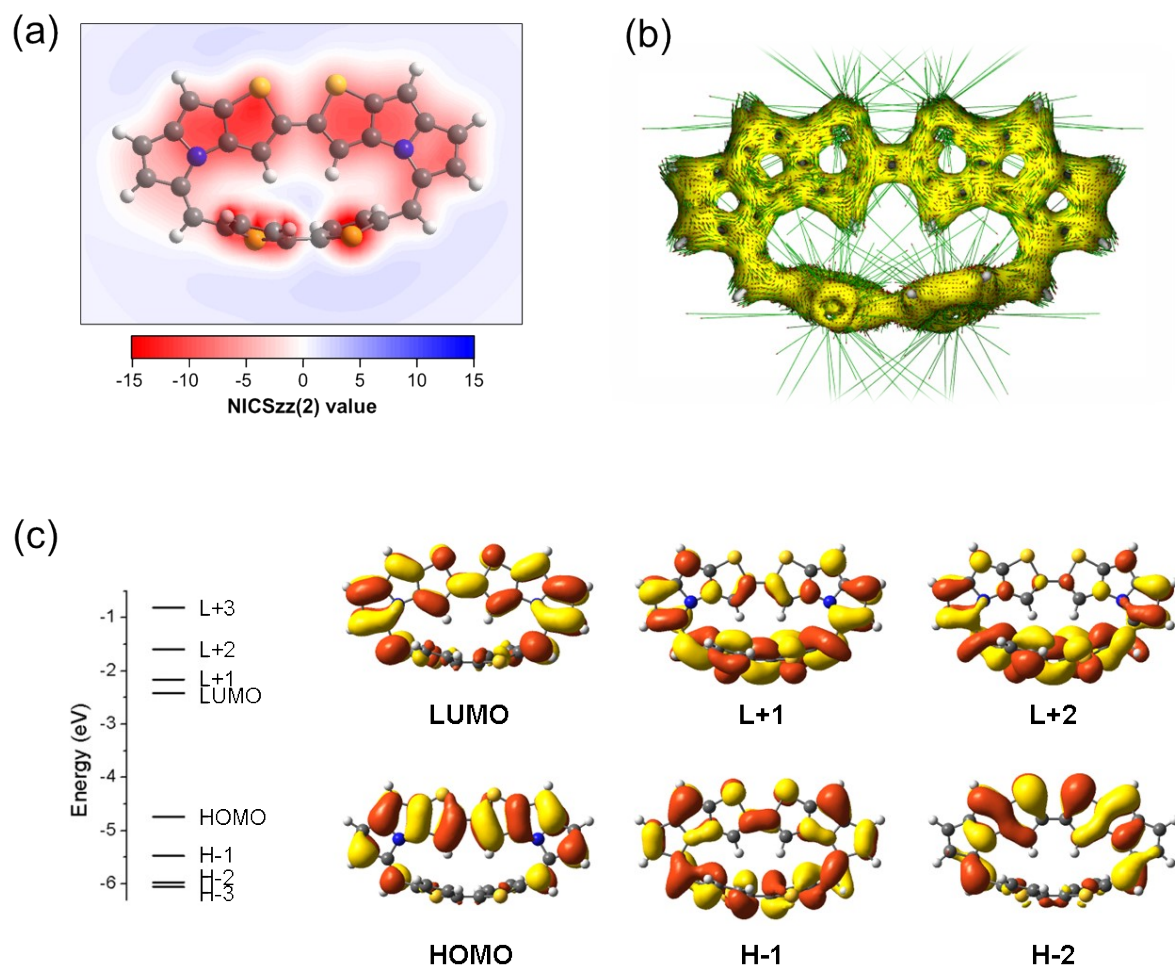

**Figure S54.** (a)  $\text{NICS}_{zz}(2)$  map, (b) ACID plot, and (c) MO diagram of the isolated bottom sub-macrocycle present in **5**.

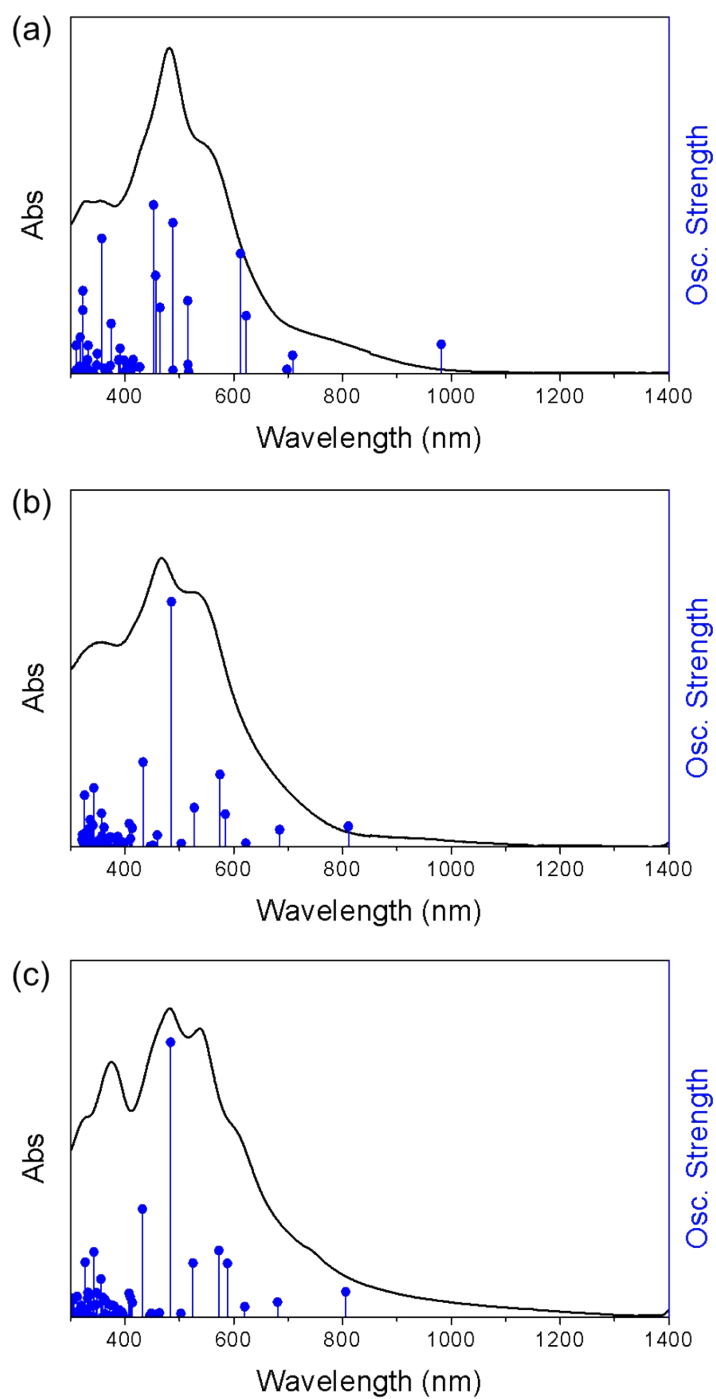

**Figure S55:** UV-Vis-NIR absorption spectra of (a) **5**, (b) **6**, and (c) **6'** with their simulated electronic transitions.

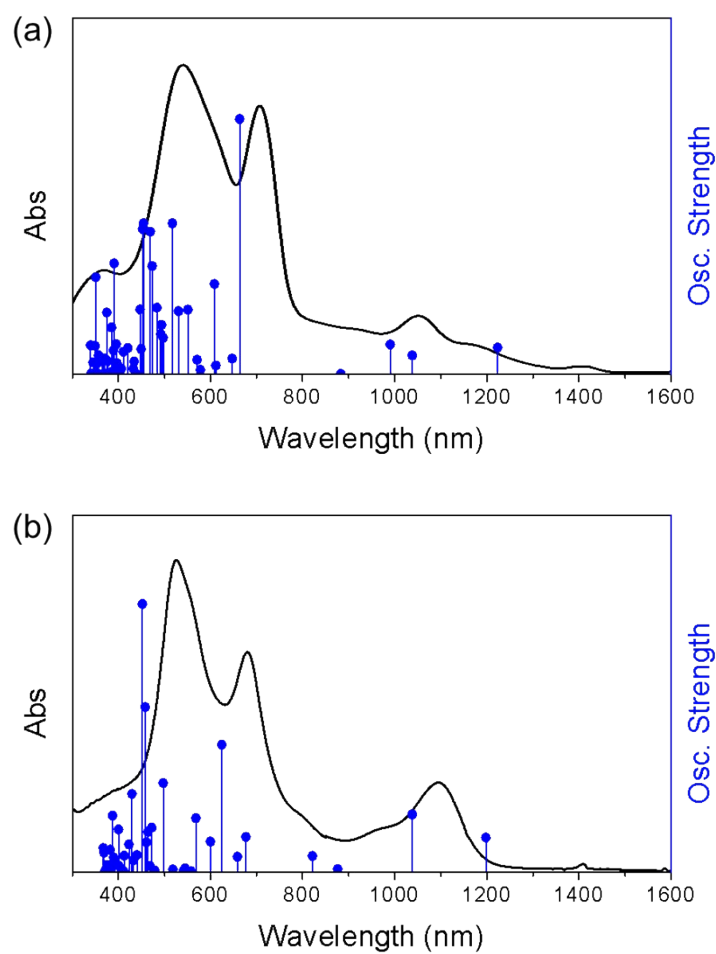

**Figure S56.** UV-Vis-NIR absorption spectra of (a)  $[5]^{2+}$  and (b)  $[6]^{2+}$  with their simulated electronic transitions.

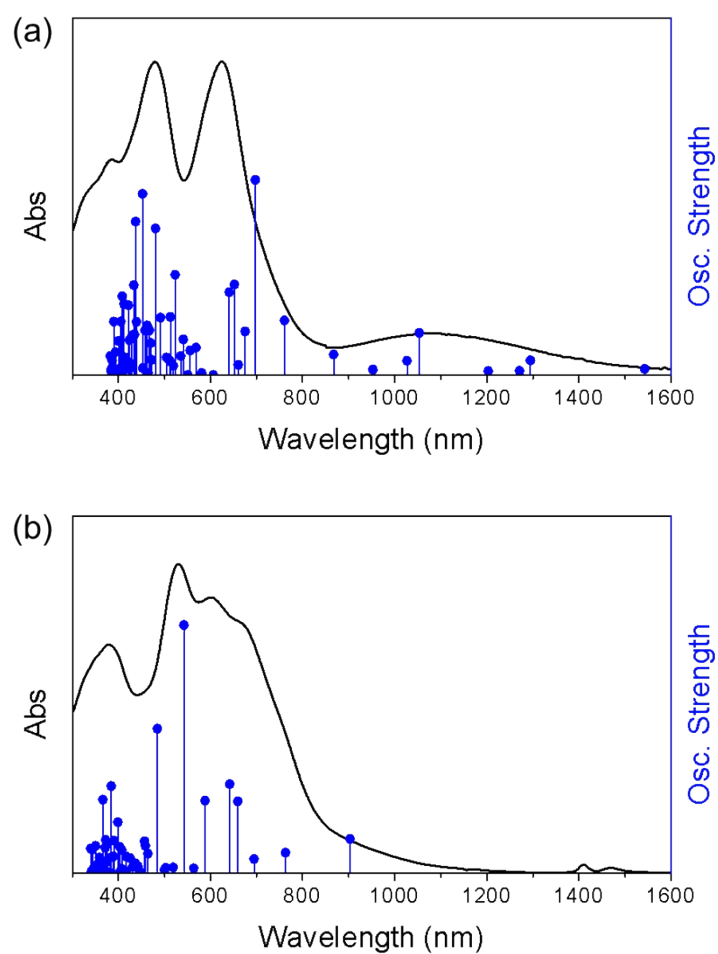

**Figure S57.** UV-Vis-NIR absorption spectra of (a)  $5\bullet 2H^+$  in the  $T_1$  state and (b)  $6\bullet 2H^+$  in the  $S_0$  state with their simulated electronic transitions.

**Table S4:** Coordinates for S<sub>0</sub> optimized geometry of the normal conformer of *meso* free compound **5** at B3LYP/6-311G\*\* level of theory # Sum of imaginary frequencies=0 # Total Energy (hartree) = -4374.733733

| Atom | X            | Y            | Z            | Atom | X            | Y            | Z            |
|------|--------------|--------------|--------------|------|--------------|--------------|--------------|
| C    | -0.219098000 | -3.098809000 | 0.086822000  | C    | 3.179853000  | -6.340721000 | 0.773128000  |
| C    | -1.564851000 | -2.911778000 | -0.222703000 | H    | 3.849474000  | -7.168483000 | 0.958887000  |
| C    | -1.941182000 | -1.555338000 | -0.318645000 | C    | 3.567142000  | -4.937136000 | 0.670299000  |
| H    | -2.898117000 | -1.177790000 | -0.632141000 | C    | 4.850779000  | -4.461146000 | 0.750295000  |
| C    | -0.878815000 | -0.720136000 | -0.019276000 | C    | 5.347825000  | -3.139683000 | 0.584492000  |
| C    | -0.878886000 | 0.720133000  | 0.019593000  | C    | 6.696740000  | -2.804109000 | 0.680167000  |
| C    | -1.941331000 | 1.555259000  | 0.318877000  | H    | 7.453123000  | -3.540713000 | 0.920101000  |
| H    | -2.898255000 | 1.177667000  | 0.632367000  | C    | 6.969356000  | -1.456368000 | 0.445611000  |
| C    | -1.565052000 | 2.911727000  | 0.223047000  | H    | 7.960605000  | -1.028790000 | 0.501311000  |
| C    | -0.219289000 | 3.098848000  | -0.086375000 | C    | 5.835325000  | -0.704023000 | 0.153567000  |
| C    | 0.100706000  | 4.485575000  | -0.139430000 | C    | 5.835265000  | 0.704428000  | -0.153700000 |
| C    | -1.109093000 | 5.136596000  | 0.136564000  | C    | 6.969224000  | 1.456866000  | -0.445778000 |
| C    | -1.666892000 | 6.431527000  | 0.395256000  | H    | 7.960506000  | 1.029369000  | -0.501510000 |
| H    | -1.133250000 | 7.365709000  | 0.315354000  | C    | 6.696489000  | 2.804583000  | -0.680336000 |
| C    | -2.963987000 | 6.267361000  | 0.763834000  | H    | 7.452802000  | 3.541245000  | -0.920312000 |
| H    | -3.674792000 | 7.038845000  | 1.017712000  | C    | 5.347548000  | 3.140042000  | -0.584632000 |
| C    | -3.311125000 | 4.847063000  | 0.742640000  | C    | 4.850392000  | 4.461464000  | -0.750452000 |
| C    | -4.532467000 | 4.356010000  | 1.080945000  | C    | 3.566738000  | 4.937384000  | -0.670343000 |
| C    | -5.019866000 | 2.985272000  | 1.027350000  | C    | 3.179370000  | 6.340947000  | -0.773155000 |
| C    | -5.814683000 | 0.887517000  | 1.693480000  | H    | 3.848942000  | 7.168746000  | -0.958928000 |
| H    | -6.133290000 | 0.128752000  | 2.396724000  | C    | 1.838503000  | 6.379584000  | -0.577898000 |
| C    | -5.655909000 | 0.635397000  | 0.349187000  | H    | 1.194760000  | 7.246463000  | -0.586861000 |
| C    | -5.655982000 | -0.636020000 | -0.348784000 | C    | 1.422731000  | 4.991676000  | -0.373749000 |
| C    | -5.815314000 | -0.888074000 | -1.693028000 | N    | -2.123801000 | -4.193419000 | -0.341768000 |
| H    | -6.134401000 | -0.129313000 | -2.396059000 | N    | -2.124122000 | 4.193324000  | 0.341903000  |
| C    | -5.476274000 | -2.210425000 | -2.068515000 | N    | 2.451846000  | 4.155506000  | -0.436418000 |
| H    | -5.507457000 | -2.571439000 | -3.088335000 | N    | 2.452198000  | -4.155313000 | 0.436454000  |
| C    | -5.019759000 | -2.985709000 | -1.027420000 | S    | 4.401126000  | -1.713645000 | 0.186044000  |
| C    | -4.531955000 | -4.356245000 | -1.081489000 | S    | 4.400991000  | 1.713947000  | -0.186063000 |
| C    | -3.310574000 | -4.847185000 | -0.743092000 | S    | 0.605319000  | 1.607884000  | -0.336216000 |
| C    | -2.963189000 | -6.267410000 | -0.764848000 | S    | -5.115106000 | -2.088273000 | 0.476943000  |
| H    | -3.673818000 | -7.038896000 | -1.019210000 | S    | -5.115665000 | 2.087677000  | -0.476887000 |
| C    | -1.666180000 | -6.431529000 | -0.395930000 | S    | 0.605417000  | -1.607787000 | 0.336620000  |
| H    | -1.132405000 | -7.365653000 | -0.316228000 | C    | -5.475728000 | 2.209980000  | 2.068706000  |
| C    | -1.108656000 | -5.136618000 | -0.136569000 | H    | -5.506549000 | 2.571077000  | 3.088508000  |
| C    | 0.101051000  | -4.485512000 | 0.139610000  | H    | -5.221341000 | -5.097719000 | -1.475951000 |
| C    | 1.423123000  | -4.991538000 | 0.373834000  | H    | 5.624360000  | -5.197908000 | 0.949669000  |
| C    | 1.838971000  | -6.379419000 | 0.577975000  | H    | -5.222197000 | 5.097512000  | 1.474756000  |
| H    | 1.195255000  | -7.246318000 | 0.587039000  | H    | 5.623909000  | 5.198265000  | -0.949928000 |

**Table S5:** Coordinates for  $S_0$  optimized geometry of the *anti* conformer of *meso* free compound **6** at B3LYP/6-311G\*\* level of theory; # sum of imaginary frequencies=0 # Total Energy (hartree) = -3733.196131

| Atom | X            | Y            | Z            | Atom | X            | Y            | Z            |
|------|--------------|--------------|--------------|------|--------------|--------------|--------------|
| C    | -5.332358000 | 4.206154000  | 0.110637000  | C    | 3.847652000  | -4.294380000 | -1.859075000 |
| C    | -4.476368000 | 5.276203000  | -0.102204000 | C    | 5.648154000  | -1.888362000 | 0.424367000  |
| C    | -3.193745000 | 5.088407000  | -0.657551000 | C    | 6.239237000  | -1.686236000 | 1.651421000  |
| C    | -2.862578000 | 3.795491000  | -1.111007000 | C    | 6.532215000  | -0.331334000 | 1.924055000  |
| C    | -3.724900000 | 2.737704000  | -0.922138000 | C    | 6.124449000  | 0.534206000  | 0.928704000  |
| C    | -4.956189000 | 2.900528000  | -0.257359000 | S    | 5.506170000  | -0.369635000 | -0.435433000 |
| C    | -5.760426000 | 1.731209000  | 0.075658000  | C    | 6.184558000  | 1.975462000  | 0.947598000  |
| S    | -4.972585000 | 0.176883000  | 0.209269000  | C    | 0.005309000  | -3.230476000 | -0.148479000 |
| C    | -6.478986000 | -0.614178000 | 0.614764000  | C    | 0.993607000  | -2.220624000 | -0.192502000 |
| C    | -7.515369000 | 0.315060000  | 0.650673000  | C    | 0.477582000  | -0.986776000 | 0.171492000  |
| C    | -7.113800000 | 1.627791000  | 0.354057000  | S    | -1.244844000 | -1.083580000 | 0.583152000  |
| C    | -2.242717000 | 6.181422000  | -0.685601000 | S    | 0.243035000  | 1.758044000  | -0.244947000 |
| C    | -5.592159000 | -2.947517000 | 0.784768000  | C    | 1.151937000  | 0.297005000  | 0.170786000  |
| C    | -6.595480000 | -2.014213000 | 0.839421000  | C    | 2.490618000  | 0.569460000  | 0.409977000  |
| C    | -0.879467000 | 6.067233000  | -0.665392000 | C    | 2.791063000  | 1.939527000  | 0.212299000  |
| C    | -5.746294000 | -4.391858000 | 0.899479000  | H    | -6.277347000 | 4.372227000  | 0.614572000  |
| C    | -4.517016000 | -4.921574000 | 0.683899000  | H    | -4.772750000 | 6.267118000  | 0.226369000  |
| C    | -3.619357000 | -3.784502000 | 0.458232000  | H    | -1.908686000 | 3.634565000  | -1.587590000 |
| N    | -4.265416000 | -2.632283000 | 0.533890000  | H    | -3.436658000 | 1.757645000  | -1.282435000 |
| N    | -0.199515000 | 4.857276000  | -0.575643000 | H    | -8.536397000 | 0.030853000  | 0.873701000  |
| C    | 1.080003000  | 5.150610000  | -0.450923000 | H    | -7.793902000 | 2.468420000  | 0.314269000  |
| C    | 1.308754000  | 6.600949000  | -0.490176000 | H    | -6.668873000 | -4.915127000 | 1.107014000  |
| C    | 0.085158000  | 7.167132000  | -0.618189000 | H    | -4.235938000 | -5.963791000 | 0.706035000  |
| C    | -2.206642000 | -3.848794000 | 0.193555000  | H    | 2.260115000  | 7.105569000  | -0.411965000 |
| C    | 2.023134000  | 4.089006000  | -0.228887000 | H    | -0.155900000 | 8.219408000  | -0.671380000 |
| C    | 1.674767000  | 2.709774000  | -0.114090000 | H    | -2.570052000 | -6.820752000 | -0.782147000 |
| C    | 3.398023000  | 4.124122000  | 0.014374000  | H    | -0.238518000 | -7.627661000 | -1.766687000 |
| C    | -1.261697000 | -2.776443000 | 0.226804000  | H    | 6.556789000  | 4.721654000  | 0.789468000  |
| C    | -1.462148000 | -4.956164000 | -0.233076000 | H    | 4.411021000  | 6.115549000  | 0.068874000  |
| C    | -1.641316000 | -6.272421000 | -0.776503000 | H    | 2.506107000  | -5.154633000 | 1.134857000  |
| C    | -0.455903000 | -6.678693000 | -1.300100000 | H    | 4.179670000  | -3.535064000 | 1.913687000  |
| C    | 0.561760000  | -5.658981000 | -1.067925000 | H    | 5.414936000  | -2.861379000 | -2.145279000 |
| N    | -0.121452000 | -4.605405000 | -0.405744000 | H    | 3.751042000  | -4.500986000 | -2.919333000 |
| N    | 3.884876000  | 2.832119000  | 0.261748000  | H    | 6.419425000  | -2.491445000 | 2.351827000  |
| C    | 5.255019000  | 2.914567000  | 0.616774000  | H    | 6.963906000  | 0.017429000  | 2.853440000  |
| C    | 5.569704000  | 4.339089000  | 0.578790000  | H    | 2.009901000  | -2.346890000 | -0.527915000 |
| C    | 4.475413000  | 5.047283000  | 0.201962000  | H    | 3.178496000  | -0.188749000 | 0.739909000  |
| C    | 1.871197000  | -5.768046000 | -1.399789000 | H    | 7.115079000  | 2.396585000  | 1.318181000  |
| C    | 2.965359000  | -4.904001000 | -0.952978000 | H    | 2.122094000  | -6.607588000 | -2.041841000 |
| C    | 3.150056000  | -4.660839000 | 0.416761000  | H    | -7.599871000 | -2.370987000 | 1.049357000  |
| C    | 4.106038000  | -3.760952000 | 0.856826000  | H    | -2.651279000 | 7.187220000  | -0.633715000 |

|   |             |              |              |  |  |  |  |  |
|---|-------------|--------------|--------------|--|--|--|--|--|
| C | 4.899102000 | -3.049729000 | -0.058960000 |  |  |  |  |  |
| C | 4.785001000 | -3.368055000 | -1.422512000 |  |  |  |  |  |

**Table S6:** Coordinates for  $S_0$  optimized geometry of the *syn* conformer of *meso* free compound **6'** at B3LYP/6-311G\*\* level of theory; # sum of imaginary frequencies = 0 # Total Energy (hartree) = -3733.196043

| Atom | X            | Y            | Z            | Atom | X            | Y            | Z            |
|------|--------------|--------------|--------------|------|--------------|--------------|--------------|
| C    | 6.479505000  | 2.168131000  | 0.034217000  | C    | -5.540006000 | 0.972401000  | 0.889819000  |
| C    | 6.057213000  | 3.475843000  | 0.218413000  | C    | -5.282199000 | 2.256648000  | 0.441173000  |
| C    | 4.782834000  | 3.765346000  | 0.748236000  | C    | -5.733500000 | -1.447474000 | 0.468052000  |
| C    | 4.010677000  | 2.683219000  | 1.217327000  | C    | -6.070691000 | -1.946513000 | 1.706235000  |
| C    | 4.442751000  | 1.384412000  | 1.056248000  | C    | -5.526236000 | -3.222827000 | 1.971534000  |
| C    | 5.656781000  | 1.088302000  | 0.406284000  | C    | -4.720499000 | -3.702641000 | 0.958378000  |
| C    | 5.989193000  | -0.291587000 | 0.074342000  | S    | -4.768025000 | -2.614523000 | -0.411024000 |
| S    | 4.696238000  | -1.454453000 | -0.103250000 | C    | -3.945278000 | -4.919319000 | 0.962839000  |
| C    | 5.822148000  | -2.724560000 | -0.525637000 | C    | -1.912176000 | 2.866037000  | -0.162470000 |
| C    | 7.124640000  | -2.232148000 | -0.525781000 | C    | -2.133731000 | 1.469234000  | -0.220701000 |
| C    | 7.218642000  | -0.871070000 | -0.194609000 | C    | -0.995393000 | 0.759104000  | 0.132725000  |
| C    | 4.275487000  | 5.122593000  | 0.713767000  | S    | 0.355026000  | 1.830016000  | 0.541298000  |
| C    | 2.960322000  | 5.492824000  | 0.644278000  | S    | 0.788090000  | -1.347780000 | -0.288074000 |
| C    | 5.431939000  | -4.059176000 | -0.823370000 | C    | -0.797854000 | -0.677393000 | 0.130598000  |
| C    | 4.163187000  | -4.579757000 | -0.824039000 | C    | -1.729745000 | -1.671700000 | 0.379387000  |
| C    | 2.450650000  | 6.854884000  | 0.473995000  | C    | -1.182888000 | -2.963028000 | 0.194553000  |
| C    | 1.113015000  | 6.745218000  | 0.293431000  | H    | 7.426892000  | 1.978737000  | -0.456734000 |
| C    | 0.814138000  | 5.308409000  | 0.356419000  | H    | 6.689597000  | 4.290753000  | -0.118791000 |
| N    | 1.899160000  | 4.595767000  | 0.587339000  | H    | 3.055472000  | 2.880608000  | 1.677061000  |
| N    | 3.024312000  | -3.844528000 | -0.532790000 | H    | 3.820506000  | 0.576186000  | 1.421376000  |
| C    | 2.013828000  | -4.699564000 | -0.568012000 | H    | 7.977327000  | -2.859619000 | -0.754192000 |
| C    | 2.464067000  | -6.051800000 | -0.911767000 | H    | 8.154779000  | -0.332435000 | -0.129642000 |
| C    | 3.806753000  | -5.969615000 | -1.075969000 | H    | 3.046869000  | 7.756384000  | 0.482334000  |
| C    | -0.436521000 | 4.633843000  | 0.142728000  | H    | 0.404630000  | 7.543213000  | 0.127350000  |
| C    | 0.663491000  | -4.289460000 | -0.289130000 | H    | 1.840683000  | -6.923976000 | -1.035308000 |
| C    | 0.175609000  | -2.956009000 | -0.132313000 | H    | 4.494365000  | -6.761113000 | -1.338143000 |
| C    | -0.452307000 | -5.098569000 | -0.049068000 | H    | -1.840488000 | 7.288063000  | -0.829270000 |
| C    | -0.615969000 | 3.218378000  | 0.212868000  | H    | -4.230401000 | 6.620104000  | -1.775490000 |
| C    | -1.674799000 | 5.123060000  | -0.288010000 | H    | -2.689572000 | -7.387824000 | 0.784826000  |
| C    | -2.287391000 | 6.306306000  | -0.820924000 | H    | -0.145688000 | -7.311917000 | 0.024813000  |
| C    | -3.502810000 | 5.964596000  | -1.321243000 | H    | -5.744356000 | 1.770954000  | -2.885541000 |
| C    | -3.755775000 | 4.547454000  | -1.079318000 | H    | -6.151163000 | -0.524230000 | -2.097047000 |
| N    | -2.583160000 | 4.070840000  | -0.438814000 | H    | -5.450442000 | 0.748386000  | 1.945808000  |
| N    | -1.581751000 | -4.315283000 | 0.222238000  | H    | -5.024830000 | 3.032574000  | 1.152423000  |
| C    | -2.653770000 | -5.161980000 | 0.604013000  | H    | -6.662399000 | -1.387158000 | 2.419268000  |
| C    | -2.101943000 | -6.511348000 | 0.557682000  | H    | -5.656220000 | -3.751622000 | 2.907062000  |
| C    | -0.807067000 | -6.470608000 | 0.154698000  | H    | -3.036458000 | 0.987013000  | -0.558661000 |
| C    | -4.900641000 | 3.891039000  | -1.387275000 | H    | -2.729371000 | -1.448579000 | 0.707016000  |
| C    | -5.295812000 | 2.557628000  | -0.929358000 | H    | 6.246133000  | -4.736512000 | -1.065528000 |
| C    | -5.685182000 | 1.549588000  | -1.825508000 | H    | 5.012539000  | 5.917170000  | 0.632509000  |
| C    | -5.912828000 | 0.254244000  | -1.380751000 | H    | -4.460480000 | -5.795646000 | 1.346527000  |

|   |              |              |              |   |              |             |              |
|---|--------------|--------------|--------------|---|--------------|-------------|--------------|
| C | -5.797431000 | -0.068122000 | -0.018239000 | H | -5.597696000 | 4.435908000 | -2.017539000 |
|---|--------------|--------------|--------------|---|--------------|-------------|--------------|

**Table S7:** Coordinates for  $S_0$  optimized geometry of the normal conformer of *meso* free compound [5]<sup>2+</sup> at B3LYP/6-311G\*\* level of theory; # sum of imaginary frequencies=0 # Total Energy (hartree) = -4374.240155

| Atom | X            | Y            | Z            | Atom | X            | Y            | Z            |
|------|--------------|--------------|--------------|------|--------------|--------------|--------------|
| C    | 0.499843000  | 3.018790000  | -0.169515000 | C    | -2.541322000 | 6.606306000  | 0.291815000  |
| C    | 1.854838000  | 2.684608000  | -0.339371000 | H    | -3.130858000 | 7.505517000  | 0.393415000  |
| C    | 2.072854000  | 1.329607000  | -0.548753000 | C    | -3.064450000 | 5.241680000  | 0.238781000  |
| H    | 3.015653000  | 0.862485000  | -0.768575000 | C    | -4.412576000 | 4.916427000  | 0.299679000  |
| C    | 0.873782000  | 0.596538000  | -0.443013000 | C    | -5.040576000 | 3.663098000  | 0.251661000  |
| C    | 0.732159000  | -0.817079000 | -0.424132000 | C    | -6.439687000 | 3.498995000  | 0.306588000  |
| C    | 1.765047000  | -1.772437000 | -0.344591000 | H    | -7.109233000 | 4.344770000  | 0.392904000  |
| H    | 2.808032000  | -1.508976000 | -0.384746000 | C    | -6.857031000 | 2.186851000  | 0.240166000  |
| C    | 1.248938000  | -3.049533000 | -0.172796000 | H    | -7.895215000 | 1.890079000  | 0.271829000  |
| C    | -0.154732000 | -3.110198000 | -0.174650000 | C    | -5.795904000 | 1.266989000  | 0.134274000  |
| C    | -0.604274000 | -4.445092000 | -0.119972000 | C    | -5.946804000 | -0.143516000 | 0.058516000  |
| C    | 0.600387000  | -5.220707000 | -0.071088000 | C    | -7.179868000 | -0.822788000 | 0.037375000  |
| C    | 1.069357000  | -6.557104000 | -0.189668000 | H    | -8.133923000 | -0.317122000 | 0.069514000  |
| H    | 0.455535000  | -7.442112000 | -0.232289000 | C    | -7.048767000 | -2.193898000 | -0.030887000 |
| C    | 2.439402000  | -6.509375000 | -0.260917000 | H    | -7.883256000 | -2.882443000 | -0.054996000 |
| H    | 3.112478000  | -7.349933000 | -0.339695000 | C    | -5.713983000 | -2.644412000 | -0.064211000 |
| C    | 2.880656000  | -5.145470000 | -0.116701000 | C    | -5.361283000 | -4.002532000 | -0.111005000 |
| C    | 4.180889000  | -4.712093000 | -0.017158000 | C    | -4.106403000 | -4.592620000 | -0.130295000 |
| C    | 4.581849000  | -3.446591000 | 0.503175000  | C    | -3.868113000 | -6.035637000 | -0.129995000 |
| C    | 4.587647000  | -1.510187000 | 1.802550000  | H    | -4.629327000 | -6.801800000 | -0.130491000 |
| H    | 4.294139000  | -0.854860000 | 2.612287000  | C    | -2.524113000 | -6.195959000 | -0.120579000 |
| C    | 5.501602000  | -1.133233000 | 0.818235000  | H    | -1.974446000 | -7.124233000 | -0.112633000 |
| C    | 5.894241000  | 0.196770000  | 0.466765000  | C    | -1.966178000 | -4.845925000 | -0.125009000 |
| C    | 6.854071000  | 0.632421000  | -0.449227000 | N    | 2.578255000  | 3.902982000  | -0.258933000 |
| H    | 7.605660000  | -0.022760000 | -0.869809000 | N    | 1.699190000  | -4.380960000 | -0.025193000 |
| C    | 6.719484000  | 1.974947000  | -0.794560000 | N    | -2.923905000 | -3.907904000 | -0.131468000 |
| H    | 7.352078000  | 2.479809000  | -1.513181000 | N    | -2.048112000 | 4.339104000  | 0.110868000  |
| C    | 5.610493000  | 2.599581000  | -0.203209000 | S    | -4.251789000 | 2.100468000  | 0.114528000  |
| C    | 5.121724000  | 3.882305000  | -0.537121000 | S    | -4.611197000 | -1.279701000 | -0.012377000 |
| C    | 3.862978000  | 4.452771000  | -0.468871000 | S    | -0.869405000 | -1.555840000 | -0.342578000 |
| C    | 3.659524000  | 5.873443000  | -0.538319000 | S    | 4.869308000  | 1.530384000  | 0.961694000  |
| H    | 4.462242000  | 6.580941000  | -0.682857000 | S    | 5.808618000  | -2.467334000 | -0.278848000 |
| C    | 2.336317000  | 6.167548000  | -0.312681000 | S    | -0.524092000 | 1.639030000  | -0.182413000 |
| H    | 1.892741000  | 7.148879000  | -0.274479000 | C    | 4.064893000  | -2.788691000 | 1.616858000  |
| C    | 1.655582000  | 4.938549000  | -0.160957000 | H    | 3.336253000  | -3.245478000 | 2.272602000  |
| C    | 0.326488000  | 4.410466000  | -0.065390000 | H    | 5.871253000  | 4.554622000  | -0.946280000 |
| C    | -0.922531000 | 5.068916000  | 0.074618000  | H    | -5.097805000 | 5.753736000  | 0.393832000  |
| C    | -1.195936000 | 6.498816000  | 0.189216000  | H    | -6.207541000 | -4.683036000 | -0.121952000 |
| H    | -0.472225000 | 7.298692000  | 0.195519000  | H    | 4.943601000  | -5.399513000 | -0.370695000 |

**Table S8:** Coordinates for  $S_0$  optimized geometry of the *anti* conformer of *meso* free compound  $[6]^{2+}$  at B3LYP/6-311G\*\* level of theory; # sum of imaginary frequencies=0 # Total Energy (hartree) = -3732.692803

| Atom | X            | Y            | Z            | Atom | X            | Y            | Z            |
|------|--------------|--------------|--------------|------|--------------|--------------|--------------|
| C    | -5.996991000 | 3.300357000  | 0.414386000  | C    | 5.117862000  | -4.176880000 | -0.729359000 |
| C    | -5.325673000 | 4.507048000  | 0.374461000  | C    | 5.640265000  | -0.891458000 | 0.962032000  |
| C    | -4.023585000 | 4.599916000  | -0.175229000 | C    | 5.188024000  | -0.042075000 | 1.968442000  |
| C    | -3.497875000 | 3.458963000  | -0.829398000 | C    | 5.212681000  | 1.307923000  | 1.613246000  |
| C    | -4.171619000 | 2.265751000  | -0.802697000 | C    | 5.729716000  | 1.534268000  | 0.343278000  |
| C    | -5.405504000 | 2.133823000  | -0.122382000 | S    | 6.255412000  | 0.037998000  | -0.390150000 |
| C    | -5.982069000 | 0.823971000  | 0.054732000  | C    | 5.792269000  | 2.785833000  | -0.342232000 |
| S    | -4.941425000 | -0.574067000 | -0.036129000 | C    | 0.605727000  | -3.169575000 | -0.231877000 |
| C    | -6.280733000 | -1.650165000 | 0.289170000  | C    | 1.395668000  | -2.029562000 | -0.282754000 |
| C    | -7.470814000 | -0.913940000 | 0.460206000  | C    | 0.621906000  | -0.853277000 | -0.136376000 |
| C    | -7.302645000 | 0.458273000  | 0.346483000  | S    | -1.100861000 | -1.227625000 | 0.048599000  |
| C    | -3.261567000 | 5.806238000  | -0.025859000 | S    | -0.102434000 | 1.824969000  | -0.041245000 |
| C    | -4.999489000 | -3.799428000 | 0.265946000  | C    | 1.071849000  | 0.497812000  | -0.119263000 |
| C    | -6.161741000 | -3.043214000 | 0.377129000  | C    | 2.403284000  | 0.979339000  | -0.140765000 |
| C    | -1.886027000 | 5.904499000  | -0.055876000 | C    | 2.443384000  | 2.368164000  | -0.091434000 |
| C    | -4.934294000 | -5.255035000 | 0.312186000  | H    | -6.955413000 | 3.241219000  | 0.914800000  |
| C    | -3.628704000 | -5.577795000 | 0.150798000  | H    | -5.773540000 | 5.381814000  | 0.832055000  |
| C    | -2.917498000 | -4.306909000 | 0.022212000  | H    | -2.554416000 | 3.537032000  | -1.345060000 |
| N    | -3.752548000 | -3.262546000 | 0.095153000  | H    | -3.754350000 | 1.412720000  | -1.323375000 |
| N    | -1.039049000 | 4.816446000  | -0.137094000 | H    | -8.419929000 | -1.395652000 | 0.657446000  |
| C    | 0.193102000  | 5.306270000  | -0.103905000 | H    | -8.109711000 | 1.172281000  | 0.435442000  |
| C    | 0.200754000  | 6.766878000  | -0.003493000 | H    | -5.771844000 | -5.922964000 | 0.448944000  |
| C    | -1.101546000 | 7.136095000  | 0.045254000  | H    | -3.198795000 | -6.566600000 | 0.152621000  |
| C    | -1.514442000 | -4.117739000 | -0.114470000 | H    | 1.065557000  | 7.410057000  | 0.053422000  |
| C    | 1.285712000  | 4.384752000  | -0.104869000 | H    | -1.503575000 | 8.135140000  | 0.128311000  |
| C    | 1.173119000  | 2.981502000  | -0.055764000 | H    | -1.241483000 | -7.184201000 | -0.807432000 |
| C    | 2.689695000  | 4.621359000  | -0.187971000 | H    | 1.329193000  | -7.689589000 | -1.278368000 |
| C    | -0.776300000 | -2.917736000 | -0.084353000 | H    | 5.757829000  | 5.578732000  | -0.945880000 |
| C    | -0.518509000 | -5.132267000 | -0.323003000 | H    | 3.360297000  | 6.699471000  | -0.644264000 |
| C    | -0.422244000 | -6.491670000 | -0.709759000 | H    | 2.723195000  | -4.305923000 | 1.690279000  |
| C    | 0.900369000  | -6.746441000 | -0.973781000 | H    | 3.947966000  | -2.350646000 | 2.475595000  |
| C    | 1.684371000  | -5.575709000 | -0.690494000 | H    | 6.651636000  | -2.703360000 | -0.867276000 |
| N    | 0.748316000  | -4.579787000 | -0.311984000 | H    | 5.466409000  | -4.717699000 | -1.601662000 |
| N    | 3.385742000  | 3.427367000  | -0.103299000 | H    | 4.812496000  | -0.395923000 | 2.918346000  |
| C    | 4.748911000  | 3.670083000  | -0.400975000 | H    | 4.879516000  | 2.111561000  | 2.255788000  |
| C    | 4.834189000  | 5.077140000  | -0.698253000 | H    | 2.463334000  | -2.009722000 | -0.425034000 |
| C    | 3.604288000  | 5.656304000  | -0.523803000 | H    | 3.259312000  | 0.325803000  | -0.188197000 |
| C    | 3.056377000  | -5.539230000 | -0.704185000 | H    | 6.709612000  | 3.075328000  | -0.845873000 |
| C    | 3.910513000  | -4.560416000 | -0.101225000 | H    | 3.527972000  | -6.353083000 | -1.248096000 |
| C    | 3.564078000  | -3.935480000 | 1.117392000  | H    | -7.085621000 | -3.585679000 | 0.553919000  |
| C    | 4.265943000  | -2.842995000 | 1.566143000  | H    | -3.812602000 | 6.716458000  | 0.192461000  |

|   |             |              |              |  |  |  |  |  |
|---|-------------|--------------|--------------|--|--|--|--|--|
| C | 5.303572000 | -2.287503000 | 0.780042000  |  |  |  |  |  |
| C | 5.785351000 | -3.043951000 | -0.311997000 |  |  |  |  |  |

**Table S9:** Coordinates for T<sub>1</sub> optimized geometry of the normal conformer of *meso* free compound **5•2H<sup>+</sup>** at UB3LYP/6-311G\*\* level of theory; # sum of imaginary frequencies=0 # Total Energy (hartree) = -4375.507608

| Atom | X            | Y            | Z            | Atom | X            | Y            | Z            |
|------|--------------|--------------|--------------|------|--------------|--------------|--------------|
| C    | -0.560928000 | -3.005648000 | -0.179961000 | H    | 3.141688000  | -7.387289000 | 0.834140000  |
| C    | -1.916477000 | -2.714748000 | -0.417220000 | C    | 3.146272000  | -5.224606000 | 0.349464000  |
| C    | -2.172190000 | -1.360333000 | -0.651798000 | C    | 4.509771000  | -4.884063000 | 0.391634000  |
| H    | -3.117439000 | -0.934317000 | -0.938929000 | C    | 5.154210000  | -3.657736000 | 0.307466000  |
| C    | -1.023946000 | -0.580592000 | -0.492097000 | C    | 6.564499000  | -3.486831000 | 0.330263000  |
| C    | -0.898097000 | 0.839021000  | -0.480255000 | H    | 7.233989000  | -4.333944000 | 0.405444000  |
| C    | -1.893718000 | 1.799056000  | -0.284204000 | C    | 6.986034000  | -2.183875000 | 0.244849000  |
| H    | -2.936371000 | 1.541752000  | -0.208479000 | H    | 8.027653000  | -1.895353000 | 0.248517000  |
| C    | -1.351107000 | 3.079843000  | -0.142172000 | C    | 5.936319000  | -1.236173000 | 0.151546000  |
| C    | 0.048221000  | 3.130874000  | -0.258565000 | C    | 6.075833000  | 0.157064000  | 0.065235000  |
| C    | 0.515307000  | 4.466655000  | -0.170315000 | C    | 7.291509000  | 0.884272000  | 0.063208000  |
| C    | -0.670542000 | 5.236609000  | 0.004245000  | H    | 8.255659000  | 0.400403000  | 0.130597000  |
| C    | -1.142370000 | 6.581422000  | 0.019708000  | C    | 7.135702000  | 2.245276000  | -0.027588000 |
| H    | -0.527783000 | 7.467235000  | -0.003235000 | H    | 7.959337000  | 2.947393000  | -0.037159000 |
| C    | -2.510064000 | 6.542624000  | 0.056150000  | C    | 5.787731000  | 2.684498000  | -0.102338000 |
| H    | -3.180352000 | 7.388388000  | 0.088999000  | C    | 5.398358000  | 4.015449000  | -0.193219000 |
| C    | -2.960313000 | 5.167876000  | 0.135081000  | C    | 4.129366000  | 4.613503000  | -0.241606000 |
| C    | -4.246576000 | 4.741541000  | 0.295638000  | C    | 3.840769000  | 5.992096000  | -0.409124000 |
| C    | -4.639451000 | 3.411838000  | 0.705351000  | H    | 4.584879000  | 6.762130000  | -0.543594000 |
| C    | -4.717347000 | 1.404770000  | 1.896018000  | C    | 2.465417000  | 6.157664000  | -0.400039000 |
| H    | -4.475238000 | 0.716861000  | 2.695973000  | H    | 1.930351000  | 7.083421000  | -0.536352000 |
| C    | -5.527357000 | 1.061414000  | 0.826115000  | C    | 1.875663000  | 4.887068000  | -0.228151000 |
| C    | -5.903270000 | -0.259089000 | 0.384845000  | N    | -2.602113000 | -3.936764000 | -0.344949000 |
| C    | -6.809272000 | -0.646078000 | -0.593890000 | N    | -1.773706000 | 4.394007000  | 0.079921000  |
| H    | -7.530338000 | 0.032762000  | -1.030565000 | N    | 2.905328000  | 3.973629000  | -0.151146000 |
| C    | -6.667429000 | -1.983605000 | -0.989700000 | N    | 2.086875000  | -4.370173000 | 0.103339000  |
| H    | -7.265180000 | -2.448187000 | -1.763431000 | S    | 4.383126000  | -2.067804000 | 0.190246000  |
| C    | -5.609487000 | -2.645213000 | -0.363890000 | S    | 4.719417000  | 1.273994000  | -0.072283000 |
| C    | -5.129426000 | -3.945349000 | -0.684348000 | S    | 0.710451000  | 1.565691000  | -0.575721000 |
| C    | -3.875318000 | -4.511972000 | -0.592096000 | S    | -4.914849000 | -1.621542000 | 0.875408000  |
| C    | -3.638138000 | -5.930021000 | -0.645822000 | S    | -5.744644000 | 2.437628000  | -0.243816000 |
| H    | -4.421187000 | -6.655097000 | -0.809774000 | S    | 0.390365000  | -1.565578000 | -0.100676000 |
| C    | -2.317315000 | -6.197246000 | -0.375132000 | C    | -4.210323000 | 2.715519000  | 1.819810000  |
| H    | -1.859746000 | -7.171932000 | -0.319963000 | H    | -3.554419000 | 3.152570000  | 2.561006000  |

|   |              |              |              |   |              |              |              |
|---|--------------|--------------|--------------|---|--------------|--------------|--------------|
| C | -1.660474000 | -4.956398000 | -0.196705000 | H | 2.191685000  | -3.442605000 | -0.279067000 |
| C | -0.354314000 | -4.398402000 | -0.052074000 | H | 2.788869000  | 3.020989000  | 0.159581000  |
| C | 0.891346000  | -5.057136000 | 0.150860000  | H | -5.879061000 | -4.620328000 | -1.089076000 |
| C | 1.201456000  | -6.397338000 | 0.465485000  | H | 5.172456000  | -5.733439000 | 0.524435000  |
| H | 0.483283000  | -7.185956000 | 0.621090000  | H | -5.021357000 | 5.481180000  | 0.114604000  |
| C | 2.578355000  | -6.502212000 | 0.581285000  | H | 6.220733000  | 4.722524000  | -0.237147000 |

**Table S10:** Coordinates for  $S_0$  optimized geometry of the *anti* conformer of *meso* free compound **6•2H<sup>+</sup>** at B3LYP/6-311G\*\* level of theory; # sum of imaginary frequencies=0 # Total Energy (hartree) = -3733.964838

| Atom | X            | Y            | Z            | Atom | X            | Y            | Z            |
|------|--------------|--------------|--------------|------|--------------|--------------|--------------|
| C    | 5.705866000  | 3.720561000  | -0.332996000 | C    | -4.249671000 | -3.846831000 | 1.908358000  |
| C    | 4.972775000  | 4.879224000  | -0.124543000 | C    | -5.844010000 | -1.262101000 | -0.336429000 |
| C    | 3.770224000  | 4.855064000  | 0.610865000  | C    | -6.564180000 | -1.032084000 | -1.492998000 |
| C    | 3.412603000  | 3.646486000  | 1.245202000  | C    | -6.718120000 | 0.333126000  | -1.792373000 |
| C    | 4.153893000  | 2.498132000  | 1.054302000  | C    | -6.056855000 | 1.171433000  | -0.903160000 |
| C    | 5.284428000  | 2.494326000  | 0.214547000  | S    | -5.393960000 | 0.243945000  | 0.422397000  |
| C    | 5.949849000  | 1.236417000  | -0.105245000 | C    | -5.894850000 | 2.581896000  | -1.055299000 |
| S    | 5.008866000  | -0.231145000 | -0.095448000 | C    | -0.399117000 | -3.296395000 | 0.098216000  |
| C    | 6.382553000  | -1.212631000 | -0.565562000 | C    | -1.268711000 | -2.181157000 | 0.159373000  |
| C    | 7.505250000  | -0.396744000 | -0.711861000 | C    | -0.631046000 | -1.015258000 | -0.217643000 |
| C    | 7.259718000  | 0.962724000  | -0.466798000 | S    | 1.049936000  | -1.309776000 | -0.693031000 |
| C    | 2.918192000  | 6.029982000  | 0.675888000  | S    | -0.093434000 | 1.651462000  | 0.354860000  |
| C    | 5.248463000  | -3.471033000 | -0.704224000 | C    | -1.141030000 | 0.341124000  | -0.213066000 |
| C    | 6.327380000  | -2.616083000 | -0.754157000 | C    | -2.407888000 | 0.799554000  | -0.512031000 |
| C    | 1.552935000  | 6.012098000  | 0.692022000  | C    | -2.545806000 | 2.186096000  | -0.255622000 |
| C    | 5.261468000  | -4.902094000 | -0.809846000 | H    | 6.584210000  | 3.756968000  | -0.965755000 |
| C    | 3.985572000  | -5.368855000 | -0.641186000 | H    | 5.299104000  | 5.804127000  | -0.586042000 |
| C    | 3.124621000  | -4.241581000 | -0.446824000 | H    | 2.575836000  | 3.624504000  | 1.932218000  |
| N    | 3.910010000  | -3.130304000 | -0.501556000 | H    | 3.867057000  | 1.593659000  | 1.577113000  |
| N    | 0.758088000  | 4.867148000  | 0.551426000  | H    | 8.475301000  | -0.791808000 | -0.985066000 |
| C    | -0.562948000 | 5.190267000  | 0.492069000  | H    | 8.024999000  | 1.725173000  | -0.518928000 |
| C    | -0.647023000 | 6.617995000  | 0.672997000  | H    | 6.148748000  | -5.489032000 | -0.993400000 |
| C    | 0.619478000  | 7.109789000  | 0.780855000  | H    | 3.661027000  | -6.395423000 | -0.687883000 |
| C    | 1.725902000  | -4.161770000 | -0.246665000 | H    | -1.563771000 | 7.181956000  | 0.725283000  |
| C    | -1.555330000 | 4.221753000  | 0.262649000  | H    | 0.906240000  | 8.139328000  | 0.933793000  |
| C    | -1.366886000 | 2.801875000  | 0.143857000  | H    | 1.733481000  | -7.183179000 | 0.700475000  |
| C    | -2.929675000 | 4.416936000  | -0.042584000 | H    | -0.670555000 | -7.708365000 | 1.689670000  |
| C    | 0.900042000  | -2.987333000 | -0.291756000 | H    | -5.933030000 | 5.366979000  | -1.016045000 |
| C    | 0.851756000  | -5.186072000 | 0.188720000  | H    | -3.694448000 | 6.514990000  | -0.172163000 |
| C    | 0.881565000  | -6.522519000 | 0.709103000  | H    | -3.228038000 | -4.938285000 | -1.145210000 |
| C    | -0.344894000 | -6.787020000 | 1.230695000  | H    | -4.730399000 | -3.132197000 | -1.863080000 |
| C    | -1.229084000 | -5.650108000 | 1.021045000  | H    | -5.585492000 | -2.207656000 | 2.250624000  |
| N    | -0.422730000 | -4.677110000 | 0.361101000  | H    | -4.133056000 | -4.059657000 | 2.964785000  |
| N    | -3.532191000 | 3.197474000  | -0.310411000 | H    | -6.954574000 | -1.831067000 | -2.108939000 |

|   |              |              |              |   |              |              |              |
|---|--------------|--------------|--------------|---|--------------|--------------|--------------|
| C | -4.868124000 | 3.430997000  | -0.739446000 | H | -7.234866000 | 0.704860000  | -2.667811000 |
| C | -5.013250000 | 4.870409000  | -0.745863000 | H | -2.285984000 | -2.194895000 | 0.514613000  |
| C | -3.867446000 | 5.458953000  | -0.298740000 | H | -3.161381000 | 0.154639000  | -0.927350000 |
| C | -2.535367000 | -5.589302000 | 1.371061000  | H | -6.730296000 | 3.083576000  | -1.537278000 |
| C | -3.515449000 | -4.580284000 | 0.961989000  | H | -2.883193000 | -6.398079000 | 2.008269000  |
| C | -3.741001000 | -4.339858000 | -0.401798000 | H | 7.280791000  | -3.090554000 | -0.963656000 |
| C | -4.601410000 | -3.331610000 | -0.806319000 | H | 3.390114000  | 7.006253000  | 0.640320000  |
| C | -5.225394000 | -2.502195000 | 0.141031000  | H | 1.133838000  | 3.977839000  | 0.256777000  |
| C | -5.069041000 | -2.801150000 | 1.504927000  | H | 3.568022000  | -2.197793000 | -0.328144000 |

**Table S11:** Coordinates for T<sub>1</sub> optimized geometry of the *anti* conformer of *meso* free compound **6•2H<sup>+</sup>** at UB3LYP/6-311G\*\* level of theory; # sum of imaginary frequencies=0 # Total Energy (hartree) = -3733.938396

| Atom | X            | Y            | Z            | Atom | X            | Y            | Z            |
|------|--------------|--------------|--------------|------|--------------|--------------|--------------|
| C    | 5.889676000  | 3.751602000  | -0.086300000 | C    | -4.231382000 | -3.888307000 | 1.861859000  |
| C    | 5.147834000  | 4.899410000  | 0.053472000  | C    | -5.952905000 | -1.284142000 | -0.260818000 |
| C    | 3.811865000  | 4.867005000  | 0.556716000  | C    | -6.733634000 | -1.028589000 | -1.369708000 |
| C    | 3.360328000  | 3.619606000  | 1.088638000  | C    | -6.881702000 | 0.344026000  | -1.643607000 |
| C    | 4.106480000  | 2.483652000  | 0.966370000  | C    | -6.158906000 | 1.160969000  | -0.782172000 |
| C    | 5.363986000  | 2.484984000  | 0.298163000  | S    | -5.446003000 | 0.206320000  | 0.496429000  |
| C    | 6.011855000  | 1.253404000  | 0.001243000  | C    | -5.974105000 | 2.566783000  | -0.929990000 |
| S    | 5.125475000  | -0.254126000 | 0.173020000  | C    | -0.409177000 | -3.279776000 | 0.078651000  |
| C    | 6.464728000  | -1.212772000 | -0.444654000 | C    | -1.285724000 | -2.191572000 | 0.060639000  |
| C    | 7.561423000  | -0.355309000 | -0.709704000 | C    | -0.621314000 | -0.992773000 | -0.231328000 |
| C    | 7.306140000  | 0.983335000  | -0.484015000 | S    | 1.103383000  | -1.260068000 | -0.557943000 |
| C    | 2.984028000  | 6.010922000  | 0.511807000  | S    | -0.046286000 | 1.682932000  | 0.171381000  |
| C    | 5.302199000  | -3.452624000 | -0.588972000 | C    | -1.131529000 | 0.337828000  | -0.227508000 |
| C    | 6.404209000  | -2.584104000 | -0.669295000 | C    | -2.442596000 | 0.781497000  | -0.437313000 |
| C    | 1.581066000  | 6.013548000  | 0.534093000  | C    | -2.573399000 | 2.160400000  | -0.256518000 |
| C    | 5.293897000  | -4.859101000 | -0.763219000 | H    | 6.869546000  | 3.811318000  | -0.543236000 |
| C    | 3.994589000  | -5.314190000 | -0.604475000 | H    | 5.556846000  | 5.842945000  | -0.289397000 |
| C    | 3.172158000  | -4.197045000 | -0.343777000 | H    | 2.441273000  | 3.584692000  | 1.658169000  |
| N    | 3.985828000  | -3.093674000 | -0.341538000 | H    | 3.740504000  | 1.567568000  | 1.414761000  |
| N    | 0.797974000  | 4.882333000  | 0.343442000  | H    | 8.505684000  | -0.735801000 | -1.077223000 |
| C    | -0.535467000 | 5.204182000  | 0.352027000  | H    | 8.038260000  | 1.761842000  | -0.649030000 |
| C    | -0.618559000 | 6.591484000  | 0.608329000  | H    | 6.165411000  | -5.454239000 | -0.988099000 |
| C    | 0.672384000  | 7.089736000  | 0.701085000  | H    | 3.654449000  | -6.331631000 | -0.708166000 |
| C    | 1.757987000  | -4.097196000 | -0.149705000 | H    | -1.529506000 | 7.152734000  | 0.737971000  |
| C    | -1.534088000 | 4.207927000  | 0.131471000  | H    | 0.957702000  | 8.109370000  | 0.909238000  |
| C    | -1.351865000 | 2.812963000  | 0.031622000  | H    | 1.763783000  | -7.121419000 | 0.730889000  |
| C    | -2.929632000 | 4.391566000  | -0.098529000 | H    | -0.692652000 | -7.732697000 | 1.540655000  |

|   |              |              |              |   |              |              |              |
|---|--------------|--------------|--------------|---|--------------|--------------|--------------|
| C | 0.934157000  | -2.949227000 | -0.212444000 | H | -5.968907000 | 5.335401000  | -0.937777000 |
| C | 0.866769000  | -5.139666000 | 0.223088000  | H | -3.667110000 | 6.485109000  | -0.264040000 |
| C | 0.895166000  | -6.483873000 | 0.697056000  | H | -3.390383000 | -4.959935000 | -1.252848000 |
| C | -0.361467000 | -6.792522000 | 1.125750000  | H | -4.917876000 | -3.134848000 | -1.869813000 |
| C | -1.254481000 | -5.666114000 | 0.910818000  | H | -5.553506000 | -2.258551000 | 2.293332000  |
| N | -0.431535000 | -4.657099000 | 0.327006000  | H | -4.054683000 | -4.109905000 | 2.907983000  |
| N | -3.560551000 | 3.161338000  | -0.287454000 | H | -7.166699000 | -1.812951000 | -1.975912000 |
| C | -4.916397000 | 3.400526000  | -0.658628000 | H | -7.437533000 | 0.734779000  | -2.486199000 |
| C | -5.043619000 | 4.834323000  | -0.696114000 | H | -2.335154000 | -2.227780000 | 0.305538000  |
| C | -3.861491000 | 5.427481000  | -0.334602000 | H | -3.224337000 | 0.107548000  | -0.737452000 |
| C | -2.571731000 | -5.647941000 | 1.219774000  | H | -6.815520000 | 3.087221000  | -1.380000000 |
| C | -3.559914000 | -4.618187000 | 0.869497000  | H | -2.925442000 | -6.510869000 | 1.777856000  |
| C | -3.858118000 | -4.365815000 | -0.476680000 | H | 7.332967000  | -3.053826000 | -0.976051000 |
| C | -4.733535000 | -3.347266000 | -0.823778000 | H | 3.456495000  | 6.979968000  | 0.389940000  |
| C | -5.308323000 | -2.531625000 | 0.165057000  | H | 1.170848000  | 4.028793000  | -0.043094000 |
| C | -5.076968000 | -2.842605000 | 1.514363000  | H | 3.671558000  | -2.155903000 | -0.148804000 |

**Table S12:** Coordinates for T<sub>1</sub> optimized geometry of the normal conformer of *meso* free compound **5•2H<sup>+</sup>** at UCAM-B3LYP/6-311G\*\* level of theory in dichloromethane using the PCM solvation model; # sum of imaginary frequencies=0 # Sum of electronic and zero-point Energies= -4375.147849

| Atom | X            | Y            | Z            | Atom | X           | Y            | Z            |
|------|--------------|--------------|--------------|------|-------------|--------------|--------------|
| C    | -0.570898000 | -3.003911000 | -0.224639000 | H    | 3.107360000 | -7.377904000 | 0.883666000  |
| C    | -1.927860000 | -2.706632000 | -0.450989000 | C    | 3.122935000 | -5.236871000 | 0.317381000  |
| C    | -2.183277000 | -1.351342000 | -0.675541000 | C    | 4.487033000 | -4.900237000 | 0.362980000  |
| H    | -3.127259000 | -0.916006000 | -0.953849000 | C    | 5.133469000 | -3.673192000 | 0.296004000  |
| C    | -1.029519000 | -0.577667000 | -0.519823000 | C    | 6.544078000 | -3.509836000 | 0.315296000  |
| C    | -0.894636000 | 0.838987000  | -0.503999000 | H    | 7.204948000 | -4.365799000 | 0.368117000  |
| C    | -1.887286000 | 1.804163000  | -0.319975000 | C    | 6.974652000 | -2.207478000 | 0.251976000  |
| H    | -2.931289000 | 1.545673000  | -0.277412000 | H    | 8.017376000 | -1.921165000 | 0.250676000  |
| C    | -1.338971000 | 3.078214000  | -0.158036000 | C    | 5.930163000 | -1.252761000 | 0.182555000  |
| C    | 0.063275000  | 3.123223000  | -0.255870000 | C    | 6.074871000 | 0.141167000  | 0.106879000  |
| C    | 0.531708000  | 4.457261000  | -0.174455000 | C    | 7.291277000 | 0.866400000  | 0.117936000  |
| C    | -0.653159000 | 5.231214000  | -0.014283000 | H    | 8.251849000 | 0.376795000  | 0.198752000  |
| C    | -1.116284000 | 6.578199000  | -0.005185000 | C    | 7.136914000 | 2.228135000  | 0.022658000  |
| H    | -0.487671000 | 7.454684000  | -0.032677000 | H    | 7.958450000 | 2.933337000  | 0.019585000  |
| C    | -2.485265000 | 6.544315000  | 0.031246000  | C    | 5.791373000 | 2.670344000  | -0.067671000 |
| H    | -3.157404000 | 7.389268000  | 0.060982000  | C    | 5.410008000 | 4.002181000  | -0.178070000 |
| C    | -2.940257000 | 5.171720000  | 0.117309000  | C    | 4.142926000 | 4.602988000  | -0.244941000 |
| C    | -4.227213000 | 4.753807000  | 0.299396000  | C    | 3.855582000 | 5.973328000  | -0.472803000 |
| C    | -4.617644000 | 3.431553000  | 0.726406000  | H    | 4.603773000 | 6.731973000  | -0.646380000 |
| C    | -4.646810000 | 1.408427000  | 1.893980000  | C    | 2.478543000 | 6.140723000  | -0.470314000 |
| H    | -4.352978000 | 0.707306000  | 2.665115000  | H    | 1.933070000 | 7.054134000  | -0.648900000 |

|   |              |              |              |   |              |              |              |
|---|--------------|--------------|--------------|---|--------------|--------------|--------------|
| C | -5.507693000 | 1.077466000  | 0.861256000  | C | 1.891983000  | 4.877902000  | -0.240845000 |
| C | -5.893600000 | -0.238817000 | 0.418310000  | N | -2.616660000 | -3.925331000 | -0.366756000 |
| C | -6.799630000 | -0.614559000 | -0.563975000 | N | -1.757932000 | 4.393668000  | 0.058004000  |
| H | -7.509649000 | 0.073818000  | -1.004686000 | N | 2.918889000  | 3.967365000  | -0.127946000 |
| C | -6.666254000 | -1.951086000 | -0.970067000 | N | 2.069750000  | -4.381990000 | 0.043548000  |
| H | -7.261424000 | -2.407414000 | -1.750881000 | S | 4.369665000  | -2.074393000 | 0.222564000  |
| C | -5.615519000 | -2.624328000 | -0.349080000 | S | 4.718819000  | 1.259331000  | -0.045078000 |
| C | -5.146550000 | -3.928991000 | -0.673675000 | S | 0.722594000  | 1.554460000  | -0.566582000 |
| C | -3.894025000 | -4.496748000 | -0.593980000 | S | -4.911743000 | -1.613006000 | 0.897545000  |
| C | -3.664337000 | -5.918227000 | -0.633399000 | S | -5.781697000 | 2.473228000  | -0.174218000 |
| H | -4.457266000 | -6.636501000 | -0.780847000 | S | 0.386986000  | -1.568175000 | -0.144749000 |
| C | -2.342792000 | -6.188834000 | -0.370292000 | C | -4.138542000 | 2.718127000  | 1.808374000  |
| H | -1.879274000 | -7.160141000 | -0.296845000 | H | -3.430360000 | 3.136702000  | 2.511399000  |
| C | -1.680158000 | -4.947190000 | -0.215952000 | H | 2.179859000  | -3.504457000 | -0.444953000 |
| C | -0.371068000 | -4.395463000 | -0.088081000 | H | 2.802136000  | 3.055525000  | 0.290330000  |
| C | 0.871451000  | -5.059251000 | 0.119190000  | H | -5.903450000 | -4.604428000 | -1.063923000 |
| C | 1.168265000  | -6.390161000 | 0.480296000  | H | 5.150363000  | -5.749533000 | 0.495006000  |
| H | 0.433907000  | -7.159305000 | 0.661966000  | H | -5.000131000 | 5.495172000  | 0.118226000  |
| C | 2.546273000  | -6.501876000 | 0.594842000  | H | 6.237529000  | 4.702833000  | -0.232083000 |

**Table S13:** Coordinates for  $S_0$  optimized geometry of the normal conformer of *meso* free compound **5•2H<sup>+</sup>** at CAM-B3LYP/6-311G\*\* level of theory in dichloromethane using the PCM solvation model; # sum of imaginary frequencies=0 # Sum of electronic and zero-point Energies= -4375.157778

| Atom | X            | Y            | Z            | Atom | X           | Y            | Z            |
|------|--------------|--------------|--------------|------|-------------|--------------|--------------|
| C    | -0.626360000 | -3.003278000 | -0.128541000 | C    | 3.046994000 | -5.260900000 | 0.421505000  |
| C    | -1.949290000 | -2.715347000 | -0.435437000 | C    | 4.386158000 | -4.950900000 | 0.462170000  |
| C    | -2.196963000 | -1.345992000 | -0.695588000 | C    | 5.075724000 | -3.715622000 | 0.348499000  |
| H    | -3.119555000 | -0.921224000 | -1.053084000 | C    | 6.466487000 | -3.595893000 | 0.325054000  |
| C    | -1.072862000 | -0.579003000 | -0.469463000 | H    | 7.113420000 | -4.462318000 | 0.378381000  |
| C    | -0.927295000 | 0.856356000  | -0.455117000 | C    | 6.929506000 | -2.283588000 | 0.216161000  |
| C    | -1.871644000 | 1.817987000  | -0.162732000 | H    | 7.978176000 | -2.022431000 | 0.176738000  |
| H    | -2.898366000 | 1.568054000  | 0.040488000  | C    | 5.913375000 | -1.332924000 | 0.158150000  |
| C    | -1.295476000 | 3.107658000  | -0.103646000 | C    | 6.077169000 | 0.092036000  | 0.060329000  |
| C    | 0.075724000  | 3.131435000  | -0.327181000 | C    | 7.280055000 | 0.794693000  | 0.099667000  |
| C    | 0.572160000  | 4.474963000  | -0.255256000 | H    | 8.237116000 | 0.307455000  | 0.224163000  |
| C    | -0.576988000 | 5.257450000  | -0.003145000 | C    | 7.128637000 | 2.175458000  | -0.026093000 |
| C    | -1.016441000 | 6.620836000  | 0.116442000  | H    | 7.952688000 | 2.877545000  | -0.009842000 |
| H    | -0.372854000 | 7.485832000  | 0.071281000  | C    | 5.805045000 | 2.600813000  | -0.161509000 |
| C    | -2.365448000 | 6.604679000  | 0.276743000  | C    | 5.417814000 | 3.957718000  | -0.281590000 |
| H    | -3.021389000 | 7.453571000  | 0.400411000  | C    | 4.179745000 | 4.557402000  | -0.339523000 |
| C    | -2.844453000 | 5.223282000  | 0.325265000  | C    | 3.905347000 | 5.957366000  | -0.494326000 |
| C    | -4.116816000 | 4.838968000  | 0.575820000  | H    | 4.668763000 | 6.711089000  | -0.618055000 |
| C    | -4.568091000 | 3.478132000  | 0.870655000  | C    | 2.547161000 | 6.143711000  | -0.485939000 |
| C    | -4.856605000 | 1.431818000  | 1.961877000  | H    | 2.009311000 | 7.071281000  | -0.602445000 |

|   |              |              |              |   |              |              |              |
|---|--------------|--------------|--------------|---|--------------|--------------|--------------|
| H | -4.726843000 | 0.714342000  | 2.762791000  | C | 1.932613000  | 4.863004000  | -0.328807000 |
| C | -5.490959000 | 1.131850000  | 0.777348000  | N | -2.643840000 | -3.936546000 | -0.384324000 |
| C | -5.844619000 | -0.171088000 | 0.243313000  | N | -1.681298000 | 4.433430000  | 0.126675000  |
| C | -6.644655000 | -0.497639000 | -0.835517000 | N | 2.933653000  | 3.938687000  | -0.263815000 |
| H | -7.282313000 | 0.219528000  | -1.336967000 | N | 1.980213000  | -4.395181000 | 0.185203000  |
| C | -6.518151000 | -1.841536000 | -1.246346000 | S | 4.347772000  | -2.114433000 | 0.257635000  |
| H | -7.045312000 | -2.265022000 | -2.091948000 | S | 4.736413000  | 1.199000000  | -0.156522000 |
| C | -5.580906000 | -2.559620000 | -0.521449000 | S | 0.678134000  | 1.555240000  | -0.707202000 |
| C | -5.148109000 | -3.904968000 | -0.779538000 | S | -4.962331000 | -1.580870000 | 0.795407000  |
| C | -3.921162000 | -4.492826000 | -0.651744000 | S | -5.507395000 | 2.542877000  | -0.276535000 |
| C | -3.707146000 | -5.929332000 | -0.656306000 | S | 0.314421000  | -1.562455000 | 0.021009000  |
| H | -4.504614000 | -6.638103000 | -0.824395000 | C | -4.332135000 | 2.748932000  | 2.009755000  |
| C | -2.411354000 | -6.208729000 | -0.332923000 | H | -3.779200000 | 3.145613000  | 2.851269000  |
| H | -1.961047000 | -7.182464000 | -0.218194000 | H | 2.077658000  | -3.494336000 | -0.261954000 |
| C | -1.733663000 | -4.961082000 | -0.168847000 | H | 2.790457000  | 2.993679000  | 0.062573000  |
| C | -0.437349000 | -4.416458000 | 0.019488000  | H | -5.919357000 | -4.576883000 | -1.147703000 |
| C | 0.792539000  | -5.071648000 | 0.231564000  | H | 5.040666000  | -5.803688000 | 0.613210000  |
| C | 1.094618000  | -6.435213000 | 0.546365000  | H | -4.852693000 | 5.638686000  | 0.598703000  |
| H | 0.354878000  | -7.207197000 | 0.689563000  | H | 6.253411000  | 4.649892000  | -0.327042000 |
| C | 2.453950000  | -6.549642000 | 0.655096000  |   |              |              |              |
| H | 3.018365000  | -7.435295000 | 0.906983000  |   |              |              |              |

**Table S14:** Coordinates for  $S_0$  optimized geometry of the normal conformer of *meso* free compound **5** at CAM-B3LYP/6-311G\*\* level of theory # Sum of imaginary frequencies=0 # Total Energy (hartree) = -4373.675018

| Atom | X            | Y            | Z            | Atom | X           | Y            | Z            |
|------|--------------|--------------|--------------|------|-------------|--------------|--------------|
| C    | -0.244128000 | -3.081270000 | 0.028337000  | C    | 3.123927000 | -6.317640000 | 0.853596000  |
| C    | -1.577191000 | -2.907738000 | -0.299889000 | H    | 3.780511000 | -7.142283000 | 1.088871000  |
| C    | -1.967343000 | -1.547076000 | -0.367774000 | C    | 3.525770000 | -4.920274000 | 0.738354000  |
| H    | -2.918644000 | -1.162458000 | -0.689086000 | C    | 4.782143000 | -4.437604000 | 0.873071000  |
| C    | -0.924027000 | -0.724174000 | -0.031382000 | C    | 5.259880000 | -3.099575000 | 0.697155000  |
| C    | -0.923969000 | 0.724253000  | 0.031390000  | C    | 6.572188000 | -2.731431000 | 0.900193000  |
| C    | -1.967216000 | 1.547241000  | 0.367787000  | H    | 7.320799000 | -3.433410000 | 1.242801000  |
| H    | -2.918550000 | 1.162707000  | 0.689109000  | C    | 6.828185000 | -1.380993000 | 0.630854000  |
| C    | -1.576950000 | 2.907870000  | 0.299891000  | H    | 7.790984000 | -0.909395000 | 0.763603000  |
| C    | -0.243878000 | 3.081294000  | -0.028349000 | C    | 5.713731000 | -0.698567000 | 0.199678000  |
| C    | 0.086647000  | 4.465573000  | -0.068122000 | C    | 5.713790000 | 0.698137000  | -0.199623000 |
| C    | -1.092508000 | 5.116791000  | 0.238682000  | C    | 6.828299000 | 1.380466000  | -0.630814000 |
| C    | -1.647922000 | 6.428975000  | 0.459623000  | H    | 7.791053000 | 0.908781000  | -0.763581000 |
| H    | -1.101864000 | 7.354745000  | 0.371994000  | C    | 6.572411000 | 2.730919000  | -0.900181000 |
| C    | -2.941584000 | 6.284668000  | 0.793881000  | H    | 7.321071000 | 3.432822000  | -1.242837000 |
| H    | -3.652986000 | 7.063291000  | 1.021056000  | C    | 5.260131000 | 3.099171000  | -0.697157000 |
| C    | -3.298771000 | 4.859853000  | 0.800273000  | C    | 4.782488000 | 4.437223000  | -0.873155000 |
| C    | -4.517617000 | 4.378389000  | 1.083897000  | C    | 3.526153000 | 4.919993000  | -0.738442000 |
| C    | -4.912480000 | 2.969890000  | 1.063329000  | C    | 3.124411000 | 6.317382000  | -0.853747000 |

|   |              |              |              |   |              |              |              |
|---|--------------|--------------|--------------|---|--------------|--------------|--------------|
| C | -5.391627000 | 0.796645000  | 1.727094000  | H | 3.781053000  | 7.141966000  | -1.089069000 |
| H | -5.504759000 | -0.019079000 | 2.428217000  | C | 1.802395000  | 6.352333000  | -0.600405000 |
| C | -5.433459000 | 0.624555000  | 0.371996000  | H | 1.149636000  | 7.211693000  | -0.599374000 |
| C | -5.433547000 | -0.624150000 | -0.371973000 | C | 1.404940000  | 4.966211000  | -0.349233000 |
| C | -5.391738000 | -0.796243000 | -1.727071000 | N | -2.109017000 | -4.190486000 | -0.457370000 |
| H | -5.504761000 | 0.019496000  | -2.428193000 | N | -2.108670000 | 4.190660000  | 0.457370000  |
| C | -5.103369000 | -2.128877000 | -2.117186000 | N | 2.418325000  | 4.141986000  | -0.433492000 |
| H | -4.985136000 | -2.445462000 | -3.143949000 | N | 2.417998000  | -4.142174000 | 0.433437000  |
| C | -4.912779000 | -2.969526000 | -1.063302000 | S | 4.322318000  | -1.736480000 | 0.149851000  |
| C | -4.517992000 | -4.378046000 | -1.083875000 | S | 4.322492000  | 1.736198000  | -0.149681000 |
| C | -3.299173000 | -4.859590000 | -0.800267000 | S | 0.554491000  | 1.595422000  | -0.328438000 |
| C | -2.942089000 | -6.284431000 | -0.793894000 | S | -5.165334000 | -2.138063000 | 0.442049000  |
| H | -3.653552000 | -7.063000000 | -1.021062000 | S | -5.164990000 | 2.138422000  | -0.442026000 |
| C | -1.648432000 | -6.428836000 | -0.459662000 | S | 0.554362000  | -1.595465000 | 0.328438000  |
| H | -1.102440000 | -7.354648000 | -0.372054000 | C | -5.103130000 | 2.129252000  | 2.117210000  |
| C | -1.092920000 | -5.116697000 | -0.238707000 | H | -4.984895000 | 2.445831000  | 3.143976000  |
| C | 0.086290000  | -4.465574000 | 0.068083000  | H | -5.269807000 | -5.111314000 | -1.355279000 |
| C | 1.404549000  | -4.966320000 | 0.349161000  | H | 5.556001000  | -5.153087000 | 1.134092000  |
| C | 1.801900000  | -6.352479000 | 0.600298000  | H | -5.269386000 | 5.111703000  | 1.355302000  |
| H | 1.149073000  | -7.211787000 | 0.599257000  | H | 5.556395000  | 5.152633000  | -1.134231000 |

**Table S15:** Coordinates for  $S_0$  optimized geometry of the normal conformer of *meso* free compound  $[5]^{2+}$  at CAM-B3LYP/6-311G\*\* level of theory # Sum of imaginary frequencies=0 # Total Energy (hartree) = -4373.147993

| Atom | X            | Y            | Z            | Atom | X           | Y            | Z            |
|------|--------------|--------------|--------------|------|-------------|--------------|--------------|
| C    | -0.556184000 | -2.984257000 | -0.153776000 | C    | 2.391053000 | -6.609373000 | 0.368007000  |
| C    | -1.908819000 | -2.627599000 | -0.340346000 | H    | 2.958467000 | -7.519594000 | 0.489770000  |
| C    | -2.102911000 | -1.284256000 | -0.542941000 | C    | 2.943189000 | -5.265631000 | 0.305542000  |
| H    | -3.029423000 | -0.793056000 | -0.776835000 | C    | 4.289462000 | -4.963115000 | 0.377919000  |
| C    | -0.886174000 | -0.569657000 | -0.409922000 | C    | 4.926711000 | -3.722431000 | 0.311934000  |
| C    | -0.729625000 | 0.825264000  | -0.386001000 | C    | 6.319163000 | -3.578948000 | 0.381878000  |
| C    | -1.753373000 | 1.793171000  | -0.290293000 | H    | 6.975477000 | -4.430450000 | 0.500718000  |
| H    | -2.800539000 | 1.542031000  | -0.315296000 | C    | 6.752458000 | -2.276776000 | 0.286969000  |
| C    | -1.220361000 | 3.052880000  | -0.125629000 | H    | 7.791463000 | -1.988520000 | 0.329629000  |
| C    | 0.188405000  | 3.087304000  | -0.150547000 | C    | 5.706101000 | -1.359697000 | 0.141885000  |
| C    | 0.656037000  | 4.403852000  | -0.112864000 | C    | 5.883123000 | 0.051735000  | 0.026064000  |
| C    | -0.516990000 | 5.191320000  | -0.047276000 | C    | 7.119697000 | 0.686981000  | -0.045044000 |
| C    | -0.945998000 | 6.554254000  | -0.118959000 | H    | 8.061659000 | 0.160006000  | -0.032242000 |
| H    | -0.298748000 | 7.414433000  | -0.160767000 | C    | 7.018231000 | 2.063217000  | -0.141885000 |
| C    | -2.299643000 | 6.553102000  | -0.143559000 | H    | 7.866286000 | 2.731030000  | -0.205732000 |
| H    | -2.950516000 | 7.413227000  | -0.187227000 | C    | 5.706809000 | 2.530409000  | -0.147580000 |
| C    | -2.790430000 | 5.191989000  | -0.014322000 | C    | 5.385115000 | 3.907205000  | -0.213356000 |
| C    | -4.072861000 | 4.815385000  | 0.146423000  | C    | 4.161324000 | 4.509215000  | -0.211659000 |
| C    | -4.473582000 | 3.498577000  | 0.590796000  | C    | 3.935825000 | 5.949560000  | -0.236783000 |
| C    | -4.547006000 | 1.545763000  | 1.836976000  | H    | 4.705658000 | 6.705317000  | -0.275456000 |

|   |              |              |              |   |              |              |              |
|---|--------------|--------------|--------------|---|--------------|--------------|--------------|
| H | -4.303745000 | 0.877222000  | 2.651790000  | C | 2.601286000  | 6.123399000  | -0.194481000 |
| C | -5.364720000 | 1.190780000  | 0.789186000  | H | 2.059198000  | 7.055497000  | -0.194216000 |
| C | -5.783733000 | -0.130530000 | 0.395255000  | C | 2.032683000  | 4.781129000  | -0.153960000 |
| C | -6.720961000 | -0.489457000 | -0.557282000 | N | -2.645818000 | -3.839241000 | -0.275557000 |
| H | -7.412833000 | 0.214397000  | -0.998542000 | N | -1.629801000 | 4.389976000  | 0.009518000  |
| C | -6.647835000 | -1.836578000 | -0.910563000 | N | 2.957824000  | 3.842128000  | -0.164910000 |
| H | -7.273662000 | -2.302061000 | -1.660219000 | N | 1.953693000  | -4.345849000 | 0.153289000  |
| C | -5.613599000 | -2.512925000 | -0.273967000 | S | 4.167406000  | -2.161986000 | 0.123792000  |
| C | -5.165090000 | -3.806470000 | -0.615136000 | S | 4.584443000  | 1.208294000  | -0.033827000 |
| C | -3.922778000 | -4.381521000 | -0.533903000 | S | 0.878476000  | 1.535778000  | -0.320009000 |
| C | -3.722432000 | -5.794835000 | -0.615981000 | S | -4.862333000 | -1.499623000 | 0.916014000  |
| H | -4.521636000 | -6.497706000 | -0.798310000 | S | -5.565701000 | 2.513598000  | -0.321371000 |
| C | -2.410640000 | -6.094629000 | -0.357763000 | S | 0.486322000  | -1.625667000 | -0.146879000 |
| H | -1.963656000 | -7.073740000 | -0.326341000 | C | -4.038843000 | 2.850673000  | 1.720491000  |
| C | -1.744081000 | -4.871979000 | -0.174537000 | H | -3.371844000 | 3.310170000  | 2.436106000  |
| C | -0.405291000 | -4.358178000 | -0.050212000 | H | -5.921855000 | -4.458767000 | -1.041477000 |
| C | 0.819947000  | -5.045861000 | 0.110229000  | H | 4.960983000  | -5.807681000 | 0.496630000  |
| C | 1.053683000  | -6.472552000 | 0.244409000  | H | 6.246971000  | 4.564858000  | -0.259844000 |
| H | 0.310876000  | -7.253831000 | 0.252505000  | H | -4.835734000 | 5.562378000  | -0.045137000 |

**Table S16:** Coordinates for  $S_0$  optimized geometry of the normal conformer of *meso* free compound **6** at CAM-B3LYP/6-311G\*\* level of theory # Sum of imaginary frequencies=0 # Total Energy (hartree) = -3732.060860

| Atom | X           | Y            | Z            | Atom | X            | Y            | Z            |
|------|-------------|--------------|--------------|------|--------------|--------------|--------------|
| C    | 4.672423000 | 4.726852000  | -0.168844000 | C    | -4.259284000 | -3.804392000 | 1.316526000  |
| C    | 3.719985000 | 5.695032000  | 0.093946000  | C    | -3.279874000 | -4.631341000 | 1.838635000  |
| C    | 2.508764000 | 5.366429000  | 0.712643000  | C    | -5.120587000 | -2.439033000 | -0.602837000 |
| C    | 2.332590000 | 4.051364000  | 1.158777000  | C    | -5.459827000 | -2.233454000 | -1.910358000 |
| C    | 3.292112000 | 3.094923000  | 0.920273000  | C    | -5.957874000 | -0.933712000 | -2.164923000 |
| C    | 4.460610000 | 3.399831000  | 0.213687000  | C    | -5.979543000 | -0.141421000 | -1.054892000 |
| C    | 5.398493000 | 2.335915000  | -0.143763000 | S    | -5.477986000 | -1.029175000 | 0.347057000  |
| S    | 4.812300000 | 0.715118000  | -0.302811000 | C    | -6.347928000 | 1.263620000  | -0.970514000 |
| C    | 6.396215000 | 0.126811000  | -0.703384000 | C    | 0.354288000  | -3.199597000 | 0.249742000  |
| C    | 7.306438000 | 1.162025000  | -0.722245000 | C    | -0.746314000 | -2.304564000 | 0.298744000  |
| C    | 6.743849000 | 2.412766000  | -0.407293000 | C    | -0.389334000 | -1.054288000 | -0.139925000 |
| C    | 1.449815000 | 6.361245000  | 0.807401000  | S    | 1.304146000  | -0.963770000 | -0.613601000 |
| C    | 5.833602000 | -2.291611000 | -0.853408000 | S    | -0.483032000 | 1.686730000  | 0.279908000  |
| C    | 6.699538000 | -1.253404000 | -0.927175000 | C    | -1.213431000 | 0.149662000  | -0.159106000 |
| C    | 0.125328000 | 6.097540000  | 0.778618000  | C    | -2.553606000 | 0.262193000  | -0.437417000 |
| C    | 6.151344000 | -3.710195000 | -0.940405000 | C    | -3.010682000 | 1.595874000  | -0.246805000 |
| C    | 5.005440000 | -4.369163000 | -0.681485000 | H    | 5.568541000  | 4.991430000  | -0.716535000 |
| C    | 3.986976000 | -3.338495000 | -0.457390000 | H    | 3.889106000  | 6.713170000  | -0.239235000 |
| N    | 4.479500000 | -2.135180000 | -0.576505000 | H    | 1.421916000  | 3.782744000  | 1.669419000  |

|   |              |              |              |   |              |              |              |
|---|--------------|--------------|--------------|---|--------------|--------------|--------------|
| N | -0.406334000 | 4.817107000  | 0.625693000  | H | 3.124219000  | 2.086026000  | 1.275853000  |
| C | -1.695288000 | 4.957280000  | 0.510794000  | H | 8.355010000  | 1.006203000  | -0.940038000 |
| C | -2.104560000 | 6.363904000  | 0.615763000  | H | 7.309877000  | 3.331691000  | -0.345334000 |
| C | -0.969607000 | 7.067500000  | 0.780281000  | H | 7.124390000  | -4.124636000 | -1.159160000 |
| C | 2.599799000  | -3.565304000 | -0.144369000 | H | 4.843306000  | -5.435917000 | -0.667511000 |
| C | -2.506366000 | 3.798787000  | 0.244068000  | H | -3.112569000 | 6.744234000  | 0.555770000  |
| C | -1.998932000 | 2.471615000  | 0.110078000  | H | -0.859527000 | 8.136715000  | 0.886140000  |
| C | -3.852967000 | 3.686180000  | -0.021486000 | H | 3.367743000  | -6.415036000 | 0.928386000  |
| C | 1.531850000  | -2.616946000 | -0.194000000 | H | 1.185344000  | -7.470018000 | 1.994386000  |
| C | 2.020697000  | -4.716540000 | 0.355525000  | H | -7.076496000 | 3.939130000  | -0.702652000 |
| C | 2.376916000  | -5.990060000 | 0.932933000  | H | -5.097159000 | 5.549770000  | 0.010685000  |
| C | 1.274249000  | -6.518913000 | 1.492354000  | H | -1.655751000 | -5.407790000 | -1.020134000 |
| C | 0.126165000  | -5.644146000 | 1.244733000  | H | -3.373037000 | -3.932699000 | -1.946635000 |
| N | 0.661396000  | -4.527559000 | 0.560734000  | H | -4.982148000 | -3.347178000 | 1.982142000  |
| N | -4.185961000 | 2.364350000  | -0.310631000 | H | -3.238245000 | -4.808417000 | 2.906908000  |
| C | -5.559952000 | 2.293264000  | -0.627115000 | H | -5.316342000 | -2.979745000 | -2.678966000 |
| C | -6.046748000 | 3.673474000  | -0.520526000 | H | -6.240484000 | -0.573027000 | -3.144225000 |
| C | -5.043170000 | 4.486031000  | -0.155435000 | H | -1.727945000 | -2.523839000 | 0.685610000  |
| C | -1.152324000 | -5.922450000 | 1.533589000  | H | -3.137792000 | -0.570362000 | -0.789511000 |
| C | -2.300168000 | -5.176844000 | 1.010786000  | H | -7.368173000 | 1.524448000  | -1.230932000 |
| C | -2.398153000 | -4.969445000 | -0.364939000 | H | -1.334934000 | -6.792989000 | 2.154224000  |
| C | -3.376197000 | -4.150384000 | -0.886896000 | H | 7.740713000  | -1.474853000 | -1.139557000 |
| C | -4.292721000 | -3.512264000 | -0.048849000 | H | 1.751087000  | 7.404556000  | 0.822373000  |

**Table S17:** Coordinates for  $S_0$  optimized geometry of the normal conformer of *meso* free compound **6•2H<sup>+</sup>** at CAM-B3LYP/6-311G\*\* level of theory # Sum of imaginary frequencies=0 # Total Energy (hartree) = -3732.823129

| Atom | X           | Y            | Z            | Atom | X            | Y            | Z            |
|------|-------------|--------------|--------------|------|--------------|--------------|--------------|
| C    | 5.143807000 | 4.202164000  | -0.421522000 | C    | -3.780310000 | -4.150572000 | 1.915183000  |
| C    | 4.326260000 | 5.289424000  | -0.170269000 | C    | -5.454770000 | -1.769356000 | -0.475742000 |
| C    | 3.200842000 | 5.160646000  | 0.650219000  | C    | -5.993258000 | -1.622138000 | -1.725617000 |
| C    | 2.986619000 | 3.939540000  | 1.301763000  | C    | -6.324664000 | -0.286451000 | -2.034578000 |
| C    | 3.813388000 | 2.862042000  | 1.066200000  | C    | -5.992820000 | 0.589943000  | -1.034663000 |
| C    | 4.879324000 | 2.962903000  | 0.166952000  | S    | -5.405892000 | -0.252155000 | 0.362182000  |
| C    | 5.669690000 | 1.777749000  | -0.169879000 | C    | -6.080083000 | 2.028354000  | -1.101716000 |
| S    | 4.890886000 | 0.236743000  | -0.202083000 | C    | -0.082628000 | -3.313142000 | 0.176191000  |
| C    | 6.360285000 | -0.582857000 | -0.643310000 | C    | -1.056153000 | -2.282029000 | 0.243905000  |
| C    | 7.387650000 | 0.332858000  | -0.760725000 | C    | -0.550695000 | -1.090427000 | -0.200963000 |
| C    | 6.996190000 | 1.658703000  | -0.502513000 | S    | 1.119736000  | -1.230934000 | -0.734097000 |
| C    | 2.251709000 | 6.261738000  | 0.782556000  | S    | -0.284687000 | 1.601231000  | 0.386522000  |
| C    | 5.500476000 | -2.944031000 | -0.757616000 | C    | -1.192868000 | 0.216171000  | -0.206180000 |
| C    | 6.469780000 | -1.991745000 | -0.818062000 | C    | -2.477815000 | 0.546313000  | -0.538809000 |
| C    | 0.912975000 | 6.105830000  | 0.792208000  | C    | -2.747103000 | 1.918477000  | -0.282509000 |

|   |              |              |              |   |              |              |              |
|---|--------------|--------------|--------------|---|--------------|--------------|--------------|
| C | 5.658739000  | -4.370250000 | -0.819627000 | H | 5.971499000  | 4.305123000  | -1.111808000 |
| C | 4.448920000  | -4.955646000 | -0.620953000 | H | 4.532188000  | 6.235639000  | -0.656014000 |
| C | 3.480052000  | -3.913568000 | -0.451758000 | H | 2.190234000  | 3.847117000  | 2.029683000  |
| N | 4.133607000  | -2.740778000 | -0.552090000 | H | 3.639394000  | 1.936365000  | 1.600419000  |
| N | 0.243855000  | 4.888072000  | 0.599680000  | H | 8.398164000  | 0.042703000  | -1.015546000 |
| C | -1.087900000 | 5.067980000  | 0.559731000  | H | 7.673407000  | 2.500573000  | -0.525399000 |
| C | -1.332446000 | 6.471283000  | 0.796472000  | H | 6.601268000  | -4.866487000 | -0.994378000 |
| C | -0.137350000 | 7.090038000  | 0.924883000  | H | 4.225698000  | -6.009435000 | -0.625851000 |
| C | 2.090717000  | -3.973946000 | -0.225047000 | H | -2.307888000 | 6.922127000  | 0.868159000  |
| C | -1.973099000 | 4.014149000  | 0.300579000  | H | 0.037350000  | 8.137614000  | 1.117750000  |
| C | -1.644330000 | 2.624758000  | 0.148624000  | H | 2.454673000  | -6.936652000 | 0.803393000  |
| C | -3.339518000 | 4.085919000  | -0.023562000 | H | 0.155715000  | -7.679699000 | 1.882183000  |
| C | 1.150900000  | -2.890295000 | -0.277366000 | H | -6.415424000 | 4.794678000  | -0.959439000 |
| C | 1.350737000  | -5.053437000 | 0.278699000  | H | -4.298630000 | 6.112202000  | -0.074441000 |
| C | 1.537902000  | -6.370888000 | 0.828006000  | H | -2.530117000 | -5.249229000 | -1.034868000 |
| C | 0.371889000  | -6.743464000 | 1.390505000  | H | -4.079160000 | -3.549646000 | -1.882466000 |
| C | -0.635242000 | -5.711438000 | 1.176769000  | H | -5.243670000 | -2.608442000 | 2.137334000  |
| N | 0.050716000  | -4.673813000 | 0.485014000  | H | -3.699086000 | -4.321654000 | 2.981771000  |
| N | -3.813119000 | 2.838521000  | -0.340250000 | H | -6.130604000 | -2.448374000 | -2.408556000 |
| C | -5.167835000 | 2.956231000  | -0.757231000 | H | -6.740435000 | 0.031454000  | -2.980910000 |
| C | -5.452017000 | 4.381388000  | -0.702331000 | H | -2.051048000 | -2.372511000 | 0.647382000  |
| C | -4.376965000 | 5.051067000  | -0.241013000 | H | -3.155459000 | -0.166845000 | -0.974410000 |
| C | -1.932178000 | -5.784157000 | 1.501918000  | H | -7.003506000 | 2.432443000  | -1.505777000 |
| C | -2.967756000 | -4.860894000 | 1.031621000  | H | -2.227662000 | -6.619917000 | 2.128218000  |
| C | -3.127931000 | -4.671753000 | -0.340698000 | H | 7.473301000  | -2.356964000 | -1.007981000 |
| C | -4.011400000 | -3.724923000 | -0.816845000 | H | 2.634458000  | 7.275689000  | 0.817065000  |
| C | -4.745214000 | -2.930792000 | 0.067523000  | H | 0.713408000  | 4.048398000  | 0.294569000  |
| C | -4.647508000 | -3.182793000 | 1.438243000  | H | 3.693868000  | -1.846497000 | -0.402815000 |

**Table S18:** Coordinates for  $S_0$  optimized geometry of the normal conformer of *meso* free compound **6**<sup>2+</sup> at CAM-B3LYP/6-311G\*\* level of theory # Sum of imaginary frequencies=0  
# Total Energy (hartree) = -3731.529695

| Atom | X            | Y            | Z            | Atom | X           | Y            | Z            |
|------|--------------|--------------|--------------|------|-------------|--------------|--------------|
| C    | -5.764474000 | 3.464584000  | 0.498086000  | C    | 5.547294000 | -3.179678000 | -0.352146000 |
| C    | -5.064651000 | 4.653078000  | 0.435779000  | C    | 4.878711000 | -4.307488000 | -0.773092000 |
| C    | -3.817021000 | 4.717405000  | -0.199909000 | C    | 5.466247000 | -1.057871000 | 0.953838000  |
| C    | -3.357135000 | 3.585467000  | -0.889982000 | C    | 5.118698000 | -0.232339000 | 1.994812000  |
| C    | -4.062198000 | 2.410464000  | -0.844532000 | C    | 5.259576000 | 1.133010000  | 1.688321000  |
| C    | -5.249559000 | 2.311508000  | -0.104763000 | C    | 5.740476000 | 1.347304000  | 0.423042000  |
| C    | -5.880519000 | 1.015404000  | 0.069673000  | S    | 6.070618000 | -0.138477000 | -0.391592000 |
| S    | -4.895759000 | -0.399043000 | 0.025551000  | C    | 5.899612000 | 2.633134000  | -0.215858000 |
| C    | -6.273303000 | -1.420703000 | 0.308794000  | C    | 0.526405000 | -3.175829000 | -0.243320000 |
| C    | -7.431595000 | -0.653280000 | 0.438286000  | C    | 1.343677000 | -2.083827000 | -0.288340000 |

|   |              |              |              |   |              |              |              |
|---|--------------|--------------|--------------|---|--------------|--------------|--------------|
| C | -7.210744000 | 0.713787000  | 0.314343000  | C | 0.598716000  | -0.866741000 | -0.125091000 |
| C | -3.015856000 | 5.916623000  | -0.094481000 | S | -1.131284000 | -1.181438000 | 0.062391000  |
| C | -5.092086000 | -3.611863000 | 0.293803000  | S | -0.037637000 | 1.810620000  | -0.040368000 |
| C | -6.213623000 | -2.817981000 | 0.396534000  | C | 1.088054000  | 0.438985000  | -0.105338000 |
| C | -1.659733000 | 5.955382000  | -0.113656000 | C | 2.451119000  | 0.873740000  | -0.122771000 |
| C | -5.068905000 | -5.057651000 | 0.345199000  | C | 2.539946000  | 2.240940000  | -0.082441000 |
| C | -3.776146000 | -5.419658000 | 0.181165000  | H | -6.688086000 | 3.415436000  | 1.060366000  |
| C | -3.037797000 | -4.177577000 | 0.041734000  | H | -5.456254000 | 5.530576000  | 0.936521000  |
| N | -3.825982000 | -3.117378000 | 0.115085000  | H | -2.439644000 | 3.643822000  | -1.452872000 |
| N | -0.853061000 | 4.821688000  | -0.167011000 | H | -3.698556000 | 1.553549000  | -1.397476000 |
| C | 0.378032000  | 5.254789000  | -0.139725000 | H | -8.402177000 | -1.100132000 | 0.608253000  |
| C | 0.460280000  | 6.709702000  | -0.067670000 | H | -7.988741000 | 1.461631000  | 0.365178000  |
| C | -0.816334000 | 7.141907000  | -0.037111000 | H | -5.924943000 | -5.699259000 | 0.489068000  |
| C | -1.627337000 | -4.023453000 | -0.112011000 | H | -3.376476000 | -6.420347000 | 0.190600000  |
| C | 1.438971000  | 4.282360000  | -0.126547000 | H | 1.355803000  | 7.308840000  | -0.017288000 |
| C | 1.277574000  | 2.902999000  | -0.059456000 | H | -1.170337000 | 8.160055000  | 0.022148000  |
| C | 2.836078000  | 4.468661000  | -0.211787000 | H | -1.528594000 | -7.065613000 | -0.847166000 |
| C | -0.859793000 | -2.874042000 | -0.081002000 | H | 1.006064000  | -7.713325000 | -1.341753000 |
| C | -0.674846000 | -5.073541000 | -0.352813000 | H | 5.926880000  | 5.398192000  | -0.864590000 |
| C | -0.666059000 | -6.429635000 | -0.747185000 | H | 3.539734000  | 6.544317000  | -0.636686000 |
| C | 0.630780000  | -6.752983000 | -1.020250000 | H | 2.511766000  | -4.457214000 | 1.656709000  |
| C | 1.480601000  | -5.631904000 | -0.734452000 | H | 3.725060000  | -2.485405000 | 2.429616000  |
| N | 0.602695000  | -4.588684000 | -0.344997000 | H | 6.408167000  | -2.833705000 | -0.910965000 |
| N | 3.500520000  | 3.272351000  | -0.114448000 | H | 5.213889000  | -4.838264000 | -1.656033000 |
| C | 4.880082000  | 3.497452000  | -0.350350000 | H | 4.741477000  | -0.591337000 | 2.941382000  |
| C | 4.988095000  | 4.913111000  | -0.642663000 | H | 5.018331000  | 1.939253000  | 2.366654000  |
| C | 3.775240000  | 5.500538000  | -0.511614000 | H | 2.411207000  | -2.092524000 | -0.434382000 |
| C | 2.834873000  | -5.677051000 | -0.721244000 | H | 3.281137000  | 0.185788000  | -0.157340000 |
| C | 3.701328000  | -4.699887000 | -0.123449000 | H | 6.875643000  | 2.944847000  | -0.572173000 |
| C | 3.354887000  | -4.086892000 | 1.087702000  | H | 3.282647000  | -6.531353000 | -1.220101000 |
| C | 4.047933000  | -2.987387000 | 1.527722000  | H | -7.161177000 | -3.321669000 | 0.560321000  |
| C | 5.078367000  | -2.445165000 | 0.745694000  | H | -3.538645000 | 6.853955000  | 0.069019000  |

**Table S19:** Coordinates for  $S_0$  optimized geometry of the normal conformer of *meso* free compound **6'** at CAM-B3LYP/6-311G\*\* level of theory # Sum of imaginary frequencies=0 # Total Energy (hartree) = -3732.060905

| Atom | X           | Y           | Z           | Atom | X            | Y            | Z            |
|------|-------------|-------------|-------------|------|--------------|--------------|--------------|
| C    | 6.087316000 | 2.776996000 | 0.063922000 | C    | -5.336966000 | 1.816628000  | 0.392287000  |
| C    | 5.552129000 | 4.033508000 | 0.281627000 | C    | -5.297121000 | -1.898750000 | 0.648930000  |
| C    | 4.280949000 | 4.188177000 | 0.845391000 | C    | -5.339500000 | -2.279511000 | 1.960540000  |
| C    | 3.617362000 | 3.041365000 | 1.297827000 | C    | -4.710928000 | -3.523142000 | 2.206362000  |
| C    | 4.162355000 | 1.792626000 | 1.103436000 | C    | -4.171245000 | -4.081701000 | 1.085220000  |
| C    | 5.382140000 | 1.630376000 | 0.437891000 | S    | -4.524582000 | -3.121067000 | -0.314111000 |

|   |              |              |              |   |              |              |              |
|---|--------------|--------------|--------------|---|--------------|--------------|--------------|
| C | 5.860666000  | 0.293480000  | 0.087181000  | C | -3.389399000 | -5.304768000 | 0.986330000  |
| S | 4.712929000  | -0.979225000 | -0.157381000 | C | -2.193942000 | 2.627663000  | -0.265644000 |
| C | 5.971156000  | -2.105137000 | -0.562373000 | C | -2.271030000 | 1.209891000  | -0.318932000 |
| C | 7.205011000  | -1.492472000 | -0.508800000 | C | -1.099399000 | 0.633561000  | 0.106724000  |
| C | 7.144603000  | -0.136107000 | -0.141689000 | S | 0.110762000  | 1.824147000  | 0.566616000  |
| C | 3.654781000  | 5.503109000  | 0.849360000  | S | 0.869633000  | -1.278524000 | -0.329308000 |
| C | 2.329285000  | 5.738369000  | 0.738363000  | C | -0.756522000 | -0.784283000 | 0.123613000  |
| C | 5.741608000  | -3.476187000 | -0.896755000 | C | -1.569474000 | -1.851019000 | 0.412764000  |
| C | 4.553209000  | -4.124553000 | -0.915496000 | C | -0.890055000 | -3.084608000 | 0.224088000  |
| C | 1.676126000  | 7.038185000  | 0.576991000  | H | 7.035359000  | 2.680477000  | -0.450650000 |
| C | 0.377934000  | 6.785604000  | 0.330423000  | H | 6.097021000  | 4.909680000  | -0.052456000 |
| C | 0.240738000  | 5.323294000  | 0.351530000  | H | 2.652754000  | 3.139559000  | 1.768901000  |
| N | 1.371437000  | 4.733007000  | 0.612270000  | H | 3.619429000  | 0.923365000  | 1.453631000  |
| N | 3.340645000  | -3.520350000 | -0.599144000 | H | 8.123822000  | -2.023561000 | -0.720740000 |
| C | 2.439088000  | -4.465029000 | -0.637186000 | H | 8.011827000  | 0.499104000  | -0.027788000 |
| C | 3.019112000  | -5.757507000 | -1.014014000 | H | 2.168195000  | 7.998022000  | 0.633385000  |
| C | 4.335713000  | -5.537318000 | -1.190522000 | H | -0.411289000 | 7.498970000  | 0.148428000  |
| C | -0.925189000 | 4.525726000  | 0.082732000  | H | 2.483439000  | -6.684363000 | -1.144323000 |
| C | 1.057908000  | -4.205810000 | -0.319174000 | H | 5.098362000  | -6.247166000 | -1.474929000 |
| C | 0.438378000  | -2.930938000 | -0.143249000 | H | -2.507860000 | 7.022896000  | -0.994097000 |
| C | 0.058458000  | -5.117345000 | -0.051531000 | H | -4.782926000 | 6.129844000  | -2.011245000 |
| C | -0.967284000 | 3.100841000  | 0.168196000  | H | -1.924306000 | -7.655938000 | 0.690456000  |
| C | -2.162467000 | 4.883616000  | -0.416337000 | H | 0.584565000  | -7.296622000 | -0.073908000 |
| C | -2.865836000 | 6.005810000  | -0.988417000 | H | -5.843294000 | 1.069577000  | -2.866856000 |
| C | -4.014771000 | 5.552402000  | -1.520327000 | H | -5.925103000 | -1.197873000 | -1.927863000 |
| C | -4.149675000 | 4.117954000  | -1.256619000 | H | -5.200787000 | 0.406809000  | 1.979629000  |
| N | -2.954255000 | 3.756334000  | -0.593784000 | H | -5.147586000 | 2.663843000  | 1.039577000  |
| N | -1.130134000 | -4.466330000 | 0.267586000  | H | -5.772068000 | -1.664907000 | 2.737348000  |
| C | -2.107214000 | -5.425736000 | 0.611438000  | H | -4.609822000 | -3.968974000 | 3.186150000  |
| C | -1.426645000 | -6.719567000 | 0.491337000  | H | -3.096773000 | 0.631452000  | -0.699971000 |
| C | -0.158091000 | -6.534406000 | 0.095191000  | H | -2.576215000 | -1.723225000 | 0.770724000  |
| C | -5.228436000 | 3.367454000  | -1.518120000 | H | 6.630487000  | -4.048619000 | -1.143018000 |
| C | -5.447929000 | 2.021083000  | -0.982820000 | H | 4.316499000  | 6.364142000  | 0.836821000  |
| C | -5.721801000 | 0.925550000  | -1.799715000 | H | -3.883089000 | -6.230774000 | 1.261154000  |
| C | -5.763097000 | -0.352341000 | -1.269519000 | H | -6.003535000 | 3.820124000  | -2.126970000 |
| C | -5.544268000 | -0.566759000 | 0.093161000  |   |              |              |              |
| C | -5.382878000 | 0.545096000  | 0.922228000  |   |              |              |              |

## References

1. G. M. Sheldrick, *Acta Crystallogr.* 2015, **A71**, 3–8.
2. G. M. Sheldrick, *Acta Crystallogr.* 2015, **C71**, 3–8.
3. O. V. Dolomanov, L. J. Bourhis, R. J. Gildea, J. A. K. Howard, H. Puschmann, *J. Appl. Crystallogr.* 2009, **42**, 339–341.

4. Gaussian 16, Revision C.01, M. J. Frisch, G. W. Trucks, H. B. Schlegel, G. E. Scuseria, M. A. Robb, J. R. Cheeseman, G. Scalmani, V. Barone, G. A. Petersson, H. Nakatsuji, X. Li, M. Caricato, A. V. Marenich, J. Bloino, B. G. Janesko, R. Gomperts, B. Mennucci, H. P. Hratchian, J. V. Ortiz, A. F. Izmaylov, J. L. Sonnenberg, D. Williams-Young, F. Ding, F. Lipparini, F. Egidi, J. Goings, B. Peng, A. Petrone, T. Henderson, D. Ranasinghe, V. G. Zakrzewski, J. Gao, N. Rega, G. Zheng, W. Liang, M. Hada, M. Ehara, K. Toyota, R. Fukuda, J. Hasegawa, M. Ishida, T. Nakajima, Y. Honda, O. Kitao, H. Nakai, T. Vreven, K. Throssell, J. A. Montgomery Jr., J. E. Peralta, F. Ogliaro, M. J. Bearpark, J. J. Heyd, E. N. Brothers, K. N. Kudin, V. N. Staroverov, T. A. Keith, R. Kobayashi, J. Normand, K. Raghavachari, A. P. Rendell, J. C. Burant, S. S. Iyengar, J. Tomasi, M. Cossi, J. M. Millam, M. Klene, C. Adamo, R. Cammi, J. W. Ochterski, R. L. Martin, K. Morokuma, O. Farkas, J. B. Foresman, D. J. Fox, Gaussian, Inc., Wallingford CT, 2016.

5. (a) A. D. Becke, *J. Chem. Phys.* 1993, **98**, 1372–1377; (b) W. J. Hehre, *Acc. Chem. Res.* 1976, **9**, 399–406.

6. J. Tomasi, B. Mennucci, R. Cammi, *Chem. Rev.* 2005, **105**, 2999–3093.
